1 **Dynamic proteomics of HSV1 infection reveals molecular events that govern non-stochastic**  
2 **infection outcomes**

3 Drayman Nir<sup>1\*</sup>, Karin Omer<sup>1\*</sup>, Mayo Avi<sup>1</sup>, Danon Tamar<sup>1</sup>, Shapira Lev<sup>2</sup>, Kobilier Oren<sup>2</sup>, Alon  
4 Uri<sup>1</sup>

5 \* First co-authors

6 1 - The Department of Molecular Cell Biology, Weizmann Institute of Science, Rehovot, Israel.

7 2 - The Department of Clinical Microbiology and Immunology, Sackler School of Medicine, Tel-  
8 Aviv University, Tel-Aviv, Israel.

9

10 **Abstract:**

11 Viral infection is usually studied at the level of cell populations, averaging over hundreds of  
12 thousands of individual cells. Moreover, measurements are typically done by analyzing a few  
13 time points along the infection process. While informative, such measurements are limited in  
14 addressing how cell variability affects infection outcome. Here we employ dynamic proteomics to  
15 study virus-host interactions, using the human pathogen Herpes Simplex virus 1 as a model. We  
16 tracked >50,000 individual cells as they respond to HSV1 infection, allowing us to model  
17 infection kinetics and link infection outcome (productive or not) with the cell state at the time of  
18 initial infection. We find that single cells differ in their preexisting susceptibility to HSV1, and  
19 that this is partially mediated by their cell-cycle position. We also identify specific changes in  
20 protein levels and localization in infected cells, attesting to the power of the dynamic proteomics  
21 approach for studying virus-host interactions.

22

23

24

25

26

27

## 28 INTRODUCTION

29 Viral infection is a heterogeneous process. One example is the variation in the number of viral  
30 progeny produced by individual cells, which spans several orders of magnitude, as first described  
31 for bacteriophages in the 1940's (Delbrück, 1945). Several recent studies found similar variability  
32 in mammalian viruses (Zhu et al., 2009; Timm and Yin, 2012; Schulte and Andino, 2014; Combe  
33 et al., 2015; Heldt et al., 2015).

34 Viral infection course can also vary, between a lytic and a lysogenic (or latent) cycle. For HIV1,  
35 this decision is stochastic and governed by the initial fluctuations in the number of viral Tat  
36 proteins, leading to a bi-stable decision (Weinberger et al., 2005; Singh and Weinberger, 2009;  
37 Razooky et al., 2015). In contrast, the decision between lysogeny and lytic infection of phage  
38 Lambda seems to be more dependent on the host cell, with smaller bacteria more likely to  
39 undergo lytic infection (St-Pierre and Endy, 2008).

40 Variability also exists in infection outcome, when some cells in a population become successfully  
41 infected, while others resist the infection. One known source of this variability is cell-extrinsic,  
42 emanating from the random distribution of the number of viruses that individual cells encounter.  
43 This distribution explains why, on the population level, the percentage of infected cells is  
44 governed by Poisson's law according to the number of infectious units per cell - the multiplicity  
45 of infection (moi) (Parker, 1938; Smith, 1968).

46 In addition, infection outcome might also be influenced from the host cellular state at the time of  
47 virus adsorption. Such cell-intrinsic differences include the cell-cycle stage and cell-to-cell  
48 variability in protein levels and activities that have been studied in other contexts (Elowitz et al.,  
49 2002; Cohen et al., 2008; Tay et al., 2010; Loewer and Lahav, 2011; Kellogg and Tay, 2015).

50 Supporting a possible role for the host cellular state in determining infection outcome, Pelkmans  
51 et al. performed studies in which cells were infected with different viruses, fixed several hours  
52 later and immuno-stained for viral proteins. Using a machine learning approach, they found that  
53 infected cells differ from non-infected cells (Snijder et al., 2009, 2012). However, as cells were  
54 not imaged at the time of virus adsorption, it is unclear whether the observed differences between  
55 the cells are the cause or the consequence of viral infection success.

56 There is a lack of experiments that directly address the question of determinism in viral infection,  
57 which requires a system that follows individual cells from the time of virus adsorption to the  
58 onset of viral gene expression (distinguishing successful from failed infections).

59 To address this question, we use the dynamic proteomics approach (Sigal et al., 2006a, 2006b,  
60 2007; Geva-Zatorsky et al., 2010; Eden et al., 2011; Farkash-Amar et al., 2014) that relies on a  
61 library of human cell-line clones, each expressing a unique YFP-tagged host protein from its  
62 native chromosomal location. All the clones also express mCherry-tagged markers that are used  
63 for automated segmentation and tracking of the cells. We follow tens of thousands of individual  
64 cells from ~400 clones throughout the process of infection by the human pathogen Herpes  
65 Simplex virus 1 (HSV1). The virus expresses mTurquoise2, a bright variant of CFP (Goedhart et  
66 al., 2012), allowing the monitoring of successful infection in real-time. We start imaging at the  
67 time of viral adsorption, monitoring infection kinetics, cellular proteins level and localization as  
68 well as the cellular environment through time-lapse fluorescence microscopy (Fig. 1A).

69 This dataset allows us to probe multiple aspects of the virus-host interaction at the single cell  
70 level (Fig. 1B-D). By measuring and modeling the distribution of lag-times between virus  
71 adsorption and viral gene expression in the population (Fig. 1B), we discover that infection  
72 kinetics are well described by a Gamma distribution. We next ask if there is a role for the host  
73 cellular state in determining infection outcome. We find that 20 image-analysis features extracted  
74 from cells at the time of adsorption can be used to predict the outcome of viral infections nine  
75 hours later (Fig. 1C). These features include the cell's velocity, cell-cycle stage and nuclear area,  
76 among others. We further find that this cell-intrinsic difference in susceptibility to HSV1  
77 infection is pre-existing in the population, as infection outcome can be determined even when  
78 using cell images taken 24 hours prior to the cells encountering the virus. Finally, we analyze the  
79 effect of HSV1 infection on the host proteins (Fig. 1D). Of the ~400 host proteins studied, two  
80 (Geminin and RFX7) showed a significant difference in their concentration at the time of virus  
81 adsorption between cells that will become successfully infected and those that will not. Two  
82 others (SUMO2 and RPAP3) were degraded specifically in infected cells, and another two  
83 (SLTM and YTHDC1) changed their localization upon infection.

84

## 85 **RESULTS**

### 86 **Dynamic proteomics of human cells following HSV1 infection**

87 We infected ~400 clones from our library with a CFP-expressing HSV1 at a multiplicity of  
88 infection (moi) of 0.5. CFP expression correlates with expression of the viral immediate-early  
89 protein ICP4 (Supplementary Fig. 1), which is required for the progression of successful

90 infection. This design allowed us to compare successfully-infected and non-infected cells side by  
91 side. Note that in this cell line, the moi used is equivalent to ~50 virus particles per cell, such that  
92 all cells in the culture have likely encountered viruses. H1299 cells are fully permissive for HSV1  
93 infection, as evident by the spread of infection from primary infected cells to produce secondary  
94 infections (Fig. 1A, Supplementary Movie 1).

95 Using custom software we tracked tens of thousands of individual cells for 12 hours after HSV1  
96 adsorption at a time resolution of 20 minutes, extracting features such as the cell's position, shape  
97 and size, as well as the level and sub-cellular localization of the different fluorescent proteins.  
98 Since we continuously monitored the cells we could identify the point at which each infected cell  
99 began to express CFP. We refer to this time delay between viral adsorption and initial expression  
100 of viral encoded proteins as infection lag time. We found that the lag time is variable among  
101 individual cells with a mean time of  $5.9 \pm 2.6$  hours and a CV of 44% (Fig. 1B).

102 Since HSV1 undergoes productive infection in the cells, the distribution of lag times captures  
103 both primary infections and subsequent secondary infections (Fig. 1A,B). To determine the  
104 kinetics of infections we modeled infection kinetics as the sum of primary and secondary  
105 infections (Fig. 1B and Supplementary Fig. 2). We fitted our model with two-parameter  
106 distributions (Normal, Log-normal, Weibull and Gamma), estimating for each distribution the  
107 best fitted parameters. We found that the lag-time distribution is best described by a Gamma  
108 distribution with a shape factor of 6 and a rate parameter of 1.25 (Supplementary Fig. 2 and  
109 Methods).

110 In addition to the theoretical interest in modeling infection kinetics, this model also allowed us to  
111 determine a cut-off point between primary and secondary infections, which is 9 hours post virus  
112 adsorption. Here we are only interested in the analysis of the primary infections, which more  
113 closely resembles the initial infection of a human host. In all subsequent analyses, we considered  
114 cells as successfully infected if their initial CFP expression time was below 9 hours and as non-  
115 infected if they remained CFP negative for the entire 12 hours. Cells whose CFP expression time  
116 was between 9-12 hours were removed from the analyses.

117 As we started our time-lapse recording from viral adsorption, we could not directly observe the  
118 cell's position along the cell-cycle (based on its previous mitosis). To circumvent this, we  
119 determined the cell-cycle stage from still images, similarly to what was previously done by others  
120 (Kafri et al., 2013; Gut et al., 2015; Blasi et al., 2016) (See Methods and Supplementary Fig. 3 for  
121 more information).

122 **HSV1 infection outcome is largely determined by the host cellular state at the time of**  
123 **adsorption**

124 Overall, we tracked >52,000 single cells from ~400 different clones for 12 hours after HSV1  
125 adsorption. We determined primary infection outcome (successful or not) based on the cell's CFP  
126 levels at nine hours post adsorption. Of these cells, 22,182 were successfully infected (CFP  
127 positive) and 29,993 were not (CFP negative). The percentage of infected cells varied among  
128 different clones and was  $35\pm 13\%$  CFP positive cells.

129 To test whether infection outcome is dependent on the cellular state at the time of virus  
130 adsorption (time zero) we employed a supervised machine learning approach. If infection  
131 outcome depends on the cellular state, then features extracted from the cell image should contain  
132 information regarding the future outcome of the virus-host encounter. We therefore trained a  
133 decision-tree based classifier to predict infection outcome from features extracted from the cell  
134 image at the first two frames of the movie (Fig. 2A and Methods). We extracted standard image-  
135 analysis features (listed in Supplementary Table 1) of cell morphology (53 features such as cell  
136 size and roundness), texture (320 features such as homogeneity, contrast and dissimilarity),  
137 velocity, local cell density and cell-cycle stage.

138 We trained the classifier on 23,780 cells, using the 20 most explanatory features (Fig. 2B,  
139 Supplementary Table 1). The features used include textural features as well as the cell's velocity,  
140 mCherry concentration, cell-cycle stage, nuclear area and cell morphology. The classifier outputs  
141 the probability of a cell to become infected, ranging from 0-1, and we refer to this output  
142 hereafter as the classifier score. We classified cells based on the classifier score, using a threshold  
143 of 0.5 to assign cells to the infected or non-infected groups. We tested the classifier performance  
144 on a dataset of 8,108 cells from clones not used in the training step and found that it correctly  
145 predicted infection outcome in 75% of these cells with an area under the curve (AUC) of 0.82  
146 (Fig. 2C).

147 We next analyzed the contribution of the different features in predicting infection outcome. The  
148 most predictive feature was the nuclear cluster prominence, a measurement of textural asymmetry  
149 (Unser, 1986). Cells with low cluster prominence were more likely to become successfully  
150 infected, and the probability for infection decreased as the cluster prominence increased (Fig.  
151 2D).

152 The second most predictive feature was the cell's velocity at the time of virus adsorption (Fig.  
153 2E). While infection probability continues to increase as the cell movement increases, the most  
154 pronounced effect was seen in cells with low velocity ( $z$ -score $<0$ ) which were more resistant to  
155 viral infection. Infection probability dependence on the top 10 features can be found in  
156 Supplementary Fig. 4.

157 The cell-cycle stage was ranked ninth among these features (Fig. 2B). Infection probability  
158 showed a non-monotonic relation to the cell-cycle stage, peaking around six hours after mitosis  
159 and then decreasing as the cells progress through the cell cycle (Fig. 2F). We tested whether the  
160 cell-cycle effect is independent from that of other features by comparing the mean classifier score  
161 of cells that will become infected and those that will not over 24 hours, after aligning them to the  
162 same stage of the cell cycle (Fig. 2E). We observed that the classifier score is higher in cells that  
163 will become infected throughout the cell-cycle, implying that the cell-cycle effect is at least  
164 partially independent from that of other features, such as the cell velocity and texture that were  
165 described above.

166 The success of a machine learning algorithm in predicting the success of viral infection in  
167 individual cells suggests that the outcome of infection is not intrinsically stochastic but rather  
168 depends on the cellular state at the time of infection.

### 169 **Cellular susceptibility is pre-existing in the population prior to encountering the virus**

170 Since our time-lapse recordings started approximately 45 minutes after HSV1 adsorption to the  
171 cells, we wanted to verify that the classifier was not influenced by a rapid response of the cells to  
172 the infection. To address this, we performed longer time-lapse movies in which we first imaged  
173 the cells unperturbed for 24 hours before adding the virus. We tracked 124 infected cells and 99  
174 non-infected cells.

175 We analyzed the classifier's performance when using cell images up to 24 hours prior to the  
176 addition of the virus. We did so by using either the raw score given by the classifier (Fig. 2H  
177 ,purple line), or after normalizing according to the cell-cycle effect, as the cells move along the  
178 cell-cycle phases during these 24 hours (Fig. 2H ,orange line). Both analyses showed that  
179 susceptibility to HSV1 infection is long-lasting, with 61-63% correct classification achieved even  
180 when using images from 24 hours prior to the cells encountering the virus. This is especially  
181 apparent when controlling for the cell-cycle effect, with cell images taken 17 hours prior to virus  
182 adsorption resulting in ~70% correct classification (Fig. 2H).

183 To quantify the life time of infection susceptibility we calculated the mixing time of the predictor  
184 output (Sigal et al., 2006b). This is done by computing the auto-correlation of the predictor output  
185 over time. We found that the mixing time (the time it takes for the auto-correlation to decay to  
186 0.5) is around 6 hours when using the raw data and 10 hours when controlling for the cell-cycle  
187 effect (Supplementary Fig. 5).

188 Taken together, our findings suggest that the cellular state that underlies susceptibility to HSV1  
189 infection is composed of: (1) a faster changing, cell-cycle dependent component and (2) a more  
190 stable, cell-cycle independent component.

### 191 **Cells in the early part of the cell-cycle are more susceptible to HSV1 infection**

192 To better understand the molecular mechanism that underlies the variability in infection outcome  
193 among individual cells, we looked for proteins whose concentration significantly differ between  
194 cells that will become infected and those that will not at time zero. Of the ~400 proteins screened,  
195 we identified two such proteins - Geminin and RFX7 (Fig. 3A). On average, Geminin  
196 concentration was 40% lower in cells that will become infected and RFX7 concentration was 37%  
197 lower (Fig. 3B). The difference in their concentration was mainly observed at time zero, and  
198 disappeared later in the infection (Fig. 3C,D).

199 Geminin levels are known to be correlated with the cell-cycle stage, as Geminin is a substrate of  
200 the Anaphase Promoting Complex (McGarry and Kirschner, 1998). RFX7 is a member of a  
201 transcription factor family that binds the X-box motif, which are important for the regulation of  
202 immune genes such as MHC class II (Fontes et al., 1997). We found that both Geminin and RFX7  
203 show a similar cell-cycle related concentration profile (Fig 3E). Both are rapidly degraded  
204 following mitosis, with their concentration rising slowly towards the next mitosis (Fig. 3F).

205 The lower concentrations of Geminin and RFX7 in cells that will become infected is an  
206 independent indication that cells in the earlier part of the cell-cycle are more susceptible to HSV1  
207 infection, in agreement with the results obtained from the machine learning approach described  
208 above.

209 To further experimentally test the effect of the cell cycle on infection outcome we used the double  
210 thymidine block protocol, which synchronizes cells to the G1/S checkpoint (Bootsma et al.,  
211 1964). We infected cells either 15 minutes after releasing from the block (Fig. 3G) or 8 hours  
212 after release, where the majority of cells are in the G2/M stages (Fig. 3H). We found that cells

213 infected during the G1 and early S phases were 2-3 fold more susceptible to HSV1 infection than  
214 cells infected as the G2 and M phases, in two multiplicities of infection (Fig. 3I,J).

215 Taken together, our results clearly demonstrate a deterministic role for the cell-cycle stage in  
216 determining HSV1 infection outcome among individual cells.

### 217 **Infection kinetics are affected by position along the cell cycle**

218 After considering the effect of the cell cycle on infection outcome, we next considered its effect  
219 on infection kinetics. We divided the cells in our dataset into early (G1 and early S) and late (late  
220 S, G2 and M) stages and measured their distribution of infection lag times (Fig. 4A). We  
221 observed a clear effect of the cell-cycle on infection kinetics with cells at the early cell cycle  
222 stages infected 20% faster than cells at the late stages (Fig. 4A,B).

223 We compared the effect of the cell-cycle stage (a cell-intrinsic variability source) to that of the  
224 effective moi (a cell-extrinsic variability source). As explained above, although all experiments  
225 were conducted in the same moi of 0.5, a large variation in the percentage of infected cells was  
226 observed. We used this experimental variation to bin different time-lapse movies into four  
227 equally-spaced categories of effective moi, from low (15-29% CFP positive cells) to high (56-  
228 70% CPF positive). The distributions of lag times and the fitted models for different effective moi  
229 are shown in Fig. 4C,D.

230 We found that cells infected during G1 and early S stages show similar kinetics to cells in the  
231 highest effective moi. Cells infected during late S and G2/M stages showed kinetics similar to  
232 those in the lowest effective moi. Thus, the cell-cycle stage at the time of virus adsorption has an  
233 effect of similar magnitude to that of changing the effective moi by a factor of ~3. Furthermore,  
234 both the cell-cycle stage and the moi scale the kinetics of the infection by changing the rate  
235 parameter of the Gamma distribution ( $\beta$ ) without affecting the shape parameter ( $\alpha$ ).

236 We conclude that HSV1 infection kinetics is affected by the cell-cycle stage of the host cell at the  
237 time of viral adsorption.

### 238 **HSV1 infection causes a sharp decline in SUMO2 and RPAP3 concentrations**

239 Having considered the effect of the cellular state on infection outcome, we next turned to study  
240 the effect of viral infection on the host cell. To our surprise, the majority of the ~400 host proteins  
241 studied did not show significant differences in concentration between infected and non-infected  
242 cells (Fig. 3A).



243 However two proteins, SUMO2 and RPAP3, showed reduced protein concentrations following  
244 adsorption in cells that eventually became infected (Fig. 3A). SUMO2 is a ubiquitin homolog that  
245 can be covalently attached to cellular proteins. Indeed, a decrease in SUMO2 levels upon HSV1  
246 infection has been previously reported (Sahin et al., 2014; Sloan et al., 2015). SUMO2  
247 concentration began dropping approximately two hours after HSV1 infection and continued so for  
248 the next nine hours (Fig. 5A,C and Supplementary Movie 2).

249 RPAP3 (RNA polymerase II-associated protein 3) has not been previously characterized in the  
250 context of viral infection. In non-infected cells it showed distinct foci in the nucleus, which may  
251 represent transcriptional complexes on the cellular DNA (Fig. 5B). In HSV1 infected cells  
252 RPAP3 levels rapidly dropped, beginning at time zero and preceding CFP expression (Fig. 5B,D  
253 and Supplementary Movie 3). The degradation of RPAP3 might relate to the previously observed  
254 changes in RNA-polymerase II dependent transcription following HSV1 infection (Wagner and  
255 Roizman, 1969; Rice et al., 1994; Spencer et al., 1997; Jenkins and Spencer, 2001; Abrisch et al.,  
256 2015).

257 As the degradation of SUMO2 and RPAP3 seem to be very rapid, it is probably mediated by one  
258 of HSV1 immediate-early proteins. The most likely candidate for this is the virus encoded E3-  
259 ubiquitin ligase - ICP0. We tested this by infecting the cells with a mutant virus that does not  
260 express ICP0 and expresses a CFP reporter. Indeed, cells successfully infected by the ICP0 null  
261 mutant did not show degradation of either SUMO2 or RPAP3 (Fig. 5E,F and Supplementary  
262 Movies 4,5).

### 263 **HSV1 infection causes re-distribution of SLTM and YTHDC1**

264 One unique feature of live cell microscopy is the ability to observe changes in the localization of  
265 tagged proteins. We studied these changes by looking at the nuclear/cytoplasm ratio of the  
266 proteins, and on their coefficient of variance (CV) in the nucleus and cytoplasm (which indicate  
267 how dispersed is the protein in these compartments). We did not observe any nucleus/cytoplasm  
268 trafficking nor changes in cytoplasmic proteins CV. We found that the CV of two nuclear  
269 proteins (SLTM and YTHDC1) increased specifically in successfully infected cells (Fig.  
270 6A,B,C). Both SLTM and YTHDC1 participate in splicing of mRNA (Nayler et al., 1998; Xiao et  
271 al., 2016). The increase in the nuclear CV is a result of re-distribution of these proteins upon  
272 infection, from being equally diffused around the nucleus to forming large foci (Fig. 6 D,E and  
273 Supplementary Movies 6,7).

274 The re-distribution of YTHDC1 and SLTM could be a result of their recruitment to viral  
275 replication centers. To test this we fixed infected cells six hours after infection and stained them  
276 for either ICP4 (an immediate early protein that is required for HSV1 gene expression) or ICP8  
277 (an early protein required for HSV1 genomic replication) and found that the nuclear foci of  
278 SLTM and YTHDC1 do not co-localize with them (Fig. 6F). In fact, in agreement with the fast  
279 kinetics of the appearance of these foci, we occasionally observed cells that contained such foci  
280 but were negative for ICP8, suggesting that the re-distribution happens before viral DNA  
281 replication and is mediated by one of the immediate-early proteins of the virus.

282 As ICP0 is known to interact with many of the host proteins, we tested whether it is also involved  
283 in the re-distribution of SLTM and YTHDC1. Indeed, cells successfully infected with the mutant  
284 virus that does not express ICP0 did not show re-distribution of both proteins (Fig. 6G,H and  
285 Supplementary Movies 8,9).

286 Our results suggest that the re-distribution of SLTM and YTHDC1 into nuclear foci is an active,  
287 virus-induced process, which is facilitated by the immediate-early protein ICP0.

288

## 289 **DISCUSSION**

290 Following tens of thousands of individual cells throughout the infection process we find that the  
291 outcome of HSV1 infection is largely determined by the cellular state at the time of infection. The  
292 cell's texture, morphology and cell-cycle stage at the time of adsorption enabled a supervised  
293 machine learning algorithm to predict which of the cells will become successfully infected during  
294 the next 9 hours. This variability in susceptibility among single cells is present in the population  
295 prior to meeting the virus. We find that the cellular state that makes cells susceptible to infection  
296 is composed of a fast, cell-cycle dependent component and a more stable, cell-cycle independent  
297 component. We conclude that HSV1 infection outcome is not an intrinsically stochastic event.  
298 Rather, it seems that individual cells have specific prior tendencies to become successfully-  
299 infected, showing that cellular heterogeneity of the host can have a profound impact on its  
300 survival.

301 We found that cell velocity is correlated with the probability of successful infection. Cell  
302 movement requires the generation of membrane extensions called filopodia (Gupton and Gertler,  
303 2007), which several viruses have been reported to “surf” as a mechanism to enter their host cells  
304 (reviewed in (Taylor et al., 2011)). Thus, increased cell movement might be linked to a higher

305 chance of a virus to catch a filopodia and enter the cell. An alternative explanation might be that  
306 motile cells sample more of their environment during the 30 minutes of virus adsorption, thus  
307 increasing the chances of a virus-cell meeting taking place.

308 Contrary to our findings, previous work done on HSV1 infection in cell populations concluded  
309 that the cell-cycle position does not affect infection outcome (Cai and Schaffer, 1991; Cohen et  
310 al., 1971). One possible explanation for this discrepancy is our enhanced sensitivity in identifying  
311 infected cells. Previous work relied on the traditional plaque-assay to measure infectivity. In this  
312 assay, 10-fold serial dilutions from a viral stock are applied to cell monolayers, which are then  
313 overlaid with agarose and infectivity is monitored several days later by manual counting of the  
314 resulting plaques in the monolayer. The noise in such measurements is often on the scale of the  
315 effect which we have measured here, of 2-3 fold change in infectivity.

316 In addition to its role in determining infection outcome, the cell-cycle stage also affects the speed  
317 in which infection proceeds. Cells at the earlier part of the cell cycle (G1 and early S) had, on  
318 average, a shorter lag time between viral adsorption and CFP expression than cells infected in the  
319 later part of the cell-cycle (late S and G2/M). The fact that cells at the G1/S phase are infected  
320 faster than cells in later stages might explain why HSV1 infection interferes with the natural  
321 progress of the cell-cycle, arresting cells at either the G1/S or G2/M checkpoints (Hobbs and  
322 DeLuca, 1999; Lomonte and Everett, 1999; Ehmann et al., 2000; Song et al., 2000; Paladino et  
323 al., 2014).

324 This finding is interesting in the context of development of new anti-viral drugs. In most cases  
325 libraries of potential compounds are assessed based on their ability to decrease the percentage of  
326 infected cells at a given time point (what we refer to as infection outcome). Such screens are  
327 likely to miss potential drugs that target infection kinetics. Infection kinetics may have a dramatic  
328 effect *in vivo*, where viral replication and dissemination is in a race against the host's mounting  
329 anti-viral response. In this context, identifying the cellular determinates of infection outcome as  
330 well as its kinetics are likely to offer new targets for drug design.

331 We find that the distribution of primary infection kinetics is well-described by a Gamma  
332 distribution. The Gamma distribution is defined by two parameters - rate ( $\beta$ ) and shape ( $\alpha$ ). We  
333 find that the rate parameter varied by up to 22% between cell-cycle stages and when changing the  
334 effective moi, reflecting a scaling of the infection kinetics by these features. The shape parameter,  
335 in contrast, remained almost constant at a value of  $\alpha=6$  (changing by less than 5%). A Gamma  
336 distribution may arise as a result of a sequence of rate-limiting exponential processes. When this

337 is the case, the shape parameter is the number of processes and the rate parameter is their rate  
338 (Floyd et al., 2008; Gardner et al., 2011). In the case of HSV1 infection, this may relate to a series  
339 of processes that are required for successful infection. A possible list of six of the slowest  
340 processes (as faster ones are not rate limiting) is: (1) adsorption to the cell membrane, (2)  
341 internalization, (3) binding to microtubuli, (4) binding to the nuclear pore complex, (5) mRNA  
342 synthesis and (6) protein synthesis. The measured timescale of these processes is quite similar, in  
343 the range of 15-60 minutes (Koyama and Uchida, 1987; Sodeik et al., 1997; Willis et al., 1998;  
344 Lee et al., 2016), possibly leading to the observed Gamma distribution of infection lag times, with  
345 a mean delay time of several hours.

346 Looking at the individual proteins in our screen, we find two proteins whose concentration at time  
347 zero is indicative of infection outcome. The concentration of one of these proteins, Geminin, is  
348 well-known to be cell-cycle regulated. In fact, the Geminin protein is part of the widely-used  
349 FUCCI system to monitor cell-cycle progression in time-lapse microscopy (Sakaue-Sawano et al.,  
350 2008). The other protein, RFX7, was not previously known to be cell-cycle regulated, but our  
351 results clearly show that its dynamics through the cell-cycle is identical to that of Geminin. Thus,  
352 the lower concentration of Geminin and RFX7 in cells that will become infected reflects the  
353 higher susceptibility of cells in the early part of the cell cycle to become successfully infected.

354 We did not find any other protein whose concentration or cellular localization at time zero are  
355 indicative of infection outcome. However, this should not be interpreted to suggest that such  
356 proteins do not exist. Specifically, our library does not include known anti-viral effectors, such as  
357 proteins in the NFkB and interferon pathways, because these have low expression under the basal  
358 conditions in which the library was established. Future studies looking into the effect of  
359 heterogeneity in such proteins on viral infection outcome are likely to better shape our  
360 understanding of the interplay between host and virus.

361 Four proteins responded specifically in successfully infected cells. The degradation of one of  
362 these proteins, SUMO2, has been previously observed and reported by others (Sahin et al., 2014;  
363 Sloan et al., 2015). The three other proteins; RPAP3, YTHDC1 and SLTM have not been  
364 previously described in the context of HSV1 infection. Interestingly, all three of these proteins  
365 seem to be related to the life-cycle of mRNA.

366 RPAP3 (RNA polymerase II associated protein 3) is one of the four components of the R2TP  
367 complex (von Morgen et al., 2015), a complex responsible for the assembly of several cellular  
368 machineries, including the RNA polymerase II complex. The rapid degradation of RPAP3 is in

369 line with the previous reported alterations in RNA polymerase II upon HSV1 infection (Rice et  
370 al., 1994; Spencer et al., 1997; Jenkins and Spencer, 2001; Abrisch et al., 2015) and the known  
371 function of the virus host shutoff protein (vhs) that arrests the host's translation by degrading  
372 mRNA. The rapid block of cellular transcription and translation is likely to be important for  
373 hampering the innate-immune response in the infected cells, as the vhs protein has been shown to  
374 attenuate the host's anti-viral response (Pasieka et al., 2008; Zenner et al., 2013).

375 SLTM (SAFB-like Transcription modulator) is a scarcely studied homolog of SAF-B (Scaffold  
376 Attachment Factor B). Overexpression of SLTM in HeLa cells resulted in transcriptional  
377 repression and cell death (Chan et al., 2007). SAF-B is involved in the spatial arrangement of  
378 chromatin loops, poising them for transcription (Nayler et al., 1998). It can also directly bind to  
379 RNA and was shown to participate in the alternative splicing of different genes (Rivers et al.,  
380 2015). YTHDC1 is also a regulator of alternative splicing, which specifically recognizes and  
381 binds N<sup>6</sup>-methyladenosine (m<sup>6</sup>A)-containing RNAs (Xiao et al., 2016). YTHDC1 was shown to  
382 physically interact with SAF-B (Nayler et al., 1998) and all three proteins (YTHDC1, SLTM and  
383 SAF-B) were found to bind to the Xist long-non coding RNA that is required for X-chromosome  
384 inactivation (Chu et al., 2015). We find that upon HSV1 infection, SLTM and YTHDC1 change  
385 localization, forming several nuclear foci. A similar observation was made for SAF-B upon heat-  
386 shock treatment (Weighardt et al., 1999). However, in the context of HSV1 infection, the re-  
387 distribution of YTHDC1 and SLTM to nuclear foci seems to be actively controlled by the virus,  
388 as it requires the expression of the immediate-early protein ICP0.

389 One possible role for the sequestration of these proteins by HSV1 could be the repression of gene  
390 splicing. Unlike the majority of viruses that replicate in the nucleus, HSV1 genome contains very  
391 few introns (only 5 genes out of the ~80 encoded by the virus) and thus requires very little  
392 splicing activity. Indeed, several works have indicated that HSV1 actively represses splicing in  
393 the host (Hardy and Sandri-Goldin, 1994; Lindberg and Kreivi, 2002; Sciabica et al., 2003). This  
394 however has been called into question by a recent study that found that HSV1 causes widespread  
395 disruption of host transcription termination and that ensuing read-in into neighboring genes is  
396 responsible for the apparent inhibition of splicing (Rutkowski et al., 2015). In this regard it is  
397 interesting to note that m<sup>6</sup>A modification of mRNA (which is recognized by YTHDC1) is most  
398 abundant near transcriptional termination sites (Dominissini et al., 2012; Meyer et al., 2012).  
399 Whether the re-distribution of YTHDC1 and SLTM is linked to changes in the host alternative  
400 splicing or aberrant transcription termination is an intriguing question that requires further  
401 exploration.

402 In conclusion, this first application of the dynamic proteomics approach to study virus-host  
403 interaction at the single cell level has provided several novel insights. It allowed us to measure  
404 and model the kinetics of viral infection, to uncover the role of the host cell state in determining  
405 infection outcome and to identify new proteins that participate in the infection process. Future  
406 studies should focus on identifying the underlying molecular mechanisms that determine  
407 infection outcome and kinetics, thus opening the door to designing new and better anti-viral  
408 interventions.

409

## 410 **METHODS**

### 411 **Library of annotated clones**

412 The generation of the library of annotated clones (LARC) was described elsewhere (Sigal et al.,  
413 2007). The library consists of over 1,000 clones of the non-small cell lung carcinoma cell-line,  
414 H1299. All clones share the constitutively expressed mCherry-tagged proteins. The mCherry  
415 signal is bright in the nucleus and dim in the cytoplasm and is used for the automated  
416 segmentation and tracking of the cells during the analysis of time-lapse movies. Each of the  
417 clones in the library also expresses a unique YFP-tagged, full length protein. Tagging was done  
418 by the CD-tagging scheme, such that one copy of the gene is tagged in its native chromosomal  
419 location, and is thus under the control of its endogenous promoter. For all the clones in the  
420 library, the YFP-tagged protein shows a correct sub-cellular localization (clones that did not show  
421 correct localization were discarded). Cells were grown in RPMI supplemented with penicillin,  
422 streptomycin and 10% fetal bovine serum at 37C and 8% CO<sub>2</sub>. Cells were regularly tested for  
423 mycoplasma.

### 424 **CFP expressing HSV1**

425 HSV-1 Strain 17 was genetically modified to express mTurq2 (a brighter derivative of CFP) from  
426 the CMV immediate early promoter by homologous recombination. The reporter gene was  
427 inserted between UL37 and UL38 genes in the viral genome, a site known to tolerate insertions  
428 with minimal effect on the viral replication. Co-transfection of purified viral DNA (Szpara et al.,  
429 2011) and plasmid pMPT06 (a kind gift from Matthew Taylor, Montana State University) was  
430 followed by several rounds of plaque purification, as described in Criddle et al. (Criddle et al.,  
431 2016).

432 The ICP0 mutant express mTurq2 is based was constructed using the HSV-1 dl1403 (Stow and  
433 Stow, 1986), an HSV-1 strain 17 with a 2kb deletion in both copies of the ICP0 gene (a kind gift  
434 from Roger Everett, University of Glasgow Centre for Virus Research). A viral construct  
435 originating from the mTurq2 expressing virus described above was crossed with the HSV-1  
436 dl1403 and viral progeny where purified to obtain an ICP0 mutant express mTurq2. The progeny  
437 virus was plaque purified and tested by phenotype and by PCR to contain both the mTurq2 gene  
438 and the ICP0 deletion.

#### 439 **HSV1 titration and infection**

440 CFP expressing HSV1 was titrated in Vero cells using the Plaque assay. We assessed the  
441 infectivity of HSV1 on H1299 cells by determining the percentage of CFP positive cells at 9  
442 hours post adsorption when infecting with serial dilutions starting at an moi of 10. We compared  
443 the observed percentage of CFP positive cells to that expected from the moi, and found that  
444 H1299 cells are approximately 10-fold less susceptible to infection than Vero cells. We used this  
445 to determine the moi for all experiments. Thus, an moi of 0.5 when infecting H1299 cells is  
446 equivalent to an moi of 5 when infecting Vero cells.

#### 447 **Cells plating, infection and imaging**

448 Cells were plated and imaged in 12-well, glass-bottom plates (MatTek, MA, US). One hour  
449 before plating the cells, plates were coated with 200µl of 10 µg/ml fibronectin from bovine serum  
450 (Sigma, Israel). Plates were washed once with 1 ml PBS and 10<sup>5</sup> cells were plated in each well.  
451 Cells were allowed to grow for 24 hours. The following day, medium was replaced to an imaging  
452 medium (transparent RPMI without phenol red and riboflavin from Biological Industries, Israel,  
453 supplemented with penicillin, streptomycin and 5% fetal bovine serum) approximately one hour  
454 before infection. Medium was then aspirated and 300 µl of imaging medium containing HSV1 at  
455 an moi of 0.5 was added. Virus was allowed to adsorb to the cells for 30 minutes at 37C. During  
456 this time, the imaging set-up was performed - calibrating the microscopes, choosing four fields of  
457 view for each well and setting the acquisition times for the fluorescent channels. After 30 minutes  
458 the virus-containing medium was aspirated and 2 ml of imaging medium added to each well.  
459 Plates were placed in a temperature, CO<sub>2</sub> and humidity control chambers in the microscopes,  
460 focus adjusted and imaging started. Imaging was done using two inverted epi-fluorescent Leica  
461 microscopes (DMIRE2 and DMI6000b), controled by macro scripts developed in house.

#### 462 **Image and data analysis**

463 Flat field correction and background subtraction were done for all images prior to starting the  
464 analysis. Cell segmentation and tracking was done using the PhenoTrack package for Matlab,  
465 previously developed in our lab (Sigal et al., 2006a), with some additions and modifications. All  
466 codes used in this work are available upon request. The package was extended to extract  
467 morphological and textural features. The Harlick texture features (Haralick RM, Shanmuga K,  
468 Dinstein I, 1973) were calculated using the GLCM\_features1 function  
469 (<http://www.mathworks.com/matlabcentral/fileexchange/22187-glcmm-texture-features>). Features  
470 were extracted for each segmented cell and nucleus, once from the phase channel and once from  
471 the mCherry channel. We retained the original features and also calculated the z-scored features  
472 (normalizing for all the cells in a specific clone). We also calculated the change in these features  
473 between two consecutive frames.

474 The CFP concentration was calculated as the median value of CFP in the cell nucleus. A  
475 threshold was calculated for each clone, based on the median level of CFP in all cells of that  
476 clone in the first five frames of the movie (less than two hours post HSV1 adsorption).

477 To ensure correct tracking of the cells we employed several filters, eliminating trajectories of  
478 cells that did not meet certain criteria. Such criteria included, for example, more than one mitosis  
479 event in 12 hours and a rapid, non-physiological, change in the mCherry levels. Overall we  
480 eliminated ~2/3 of the data, remaining with ~52,000 reliably tracked cells out of ~190,000 cells  
481 imaged in total.

#### 482 **Supervised machine learning for predicting infection outcome**

483 We divided our dataset of ~52,000 cells into two group - infected (CFP positive at 9 hours post  
484 HSV1 adsorption) and non-infected (CFP negative for the entire 12 hours). Next we divided the  
485 data into train and test sets. To avoid any biases due to differences between the clones, we made  
486 sure that each clone is similarly represented in the infected and non-infected groups. We  
487 additionally made sure that no particular clone will be over represented in the dataset. 75% of the  
488 data was used for training the classifier and 25% (from clones not used in the training step) for  
489 testing its performance. The training set included 23,780 cells and the test set 8,108.

490 We used Matlab version R2015b for all supervised machine learning procedures. We used  
491 Matlab's *fitensemble* function to construct decision trees for classification using the RobustBoost  
492 algorithm. We performed feature selection by identifying the 20 features with highest predictive



493 power using the *predictorImportance* function. The final classifier included 2,000 decision trees  
494 based on the top 20 features.

#### 495 **Extracting cell-cycle data from still images**

496 We employed a supervised machine learning approach, similar to that used by others (Kafri et al.,  
497 2013; Gut et al., 2015; Blasi et al., 2016), which infers the cell-cycle position of a cell from a still  
498 image using a random forest regression predictor. The performance of this predictor is shown in  
499 Supplementary Fig. 3. We trained and tested the predictor using independent datasets of non-  
500 infected cells that divided during the movies, so that we could determine the time after mitosis for  
501 each cell in each frame. We aligned the cells trajectories to an imaginary cell-cycle length of 24  
502 hours. This gave the best results, but using other cell-cycle lengths did not significantly alter our  
503 findings. We selected the top 30 features to use in the predictor.

#### 504 **Infection kinetics modeling**

505 We fitted the distribution of infection lag times with a three-parameter mixture model for the  
506 primary and secondary infections (Supplementary Fig. 2). The model assumes that the lag time  
507 between adsorption and infection can be captured by a two-parameter distribution, and that this  
508 distribution also captures the lag between primary and secondary infections. Specifically, the  
509 number of secondary infection at a given time-point depends on the number of infections in all  
510 previous time-points with appropriate delays that are given by the two-parameter distribution.  
511 The relative number of secondary infections is also fitted as a third parameter. Overall we fitted  
512 three parameters - two for the distribution ( $\alpha, \beta$ ) and one for the relative number of secondary  
513 infections ( $\delta$ ).

514 We fitted the following two parameter distributions: Normal, Log-Normal, Weibull and Gamma.  
515 For each distribution we scanned each parameter with a resolution of 0.05. Each parameter was  
516 scanned in the range of  $\pm 1$  of the best fit value and  $\delta$  was scanned in the range of 0-2. For each  
517 set of parameters we generated a distribution from the mixture model and estimated the log-  
518 likelihood of the data given this distribution.

519 To statistically assess which distribution fits the data best we performed a bootstrapping  
520 procedure. We generated a distribution of log-likelihoods for each fit by resampling our data  
521 1,000 times with replacements. We then performed a one-sided t-test to compute the significance  
522 of the difference between these distributions. The Gamma distribution fitted our data significantly  
523 better than the other three (maximal p-value  $< 10^{-15}$ ).

524 Confidence intervals for each parameter were computed by fixing other parameters and fitting a  
525 third order polynomial to the distribution of log-likelihoods around the fitted parameter. We then  
526 computed the 95% confidence interval using the second derivative of this polynomial at this  
527 parameter. For all the parameters assessed, confidence intervals were at least one order of  
528 magnitude lower than the estimated parameter.

### 529 **Cell-cycle synchronization**

530  $5 \times 10^4$  cells were plated in 12-well glass bottom plates as described above. At 5pm the medium  
531 was replaced with a full medium containing 2 mM thymidine (Sigma-Aldrich, Israel). At 8am the  
532 next morning cells were washed twice with PBS and normal growth medium was added. At 5pm  
533 of the same day the medium was again replaced with a thymidine containing medium. At 8am the  
534 next morning half of the wells were released from blocking (washed twice and given normal  
535 growth medium) and half were maintained in the blocking medium. At 4pm, eight hours later, the  
536 blocked cells were released. Cells were washed and infected with HSV1 at an moi of 0.25 or 0.5  
537 and imaged as described above.

538 One well from each condition (15 minutes or 8 hours post-release) was harvested and fixed with  
539 70% ethanol at the time of HSV1 infection. Samples were rehydrated, treated with RNase A and  
540 stained with propidium iodide to analyze the cell-cycle stage by FACS.

541

### 542 **ACKNOWLEDGMENTS**

543 This work has been supported by an Israeli Science Foundation (ISF) grant from the Israeli  
544 Academy of Sciences (grant number #1349/15). ND wishes to thank the Clore Foundation for  
545 their generous support through the Sir Charles Clore Postdoctoral fellowships program. We thank  
546 Prof Matthew D. Weitzman for helpful discussions and critical reading of the manuscript.

547

### 548 **FIGURE LEGENDS**

549 **Figure 1. Dynamic proteomics to study virus-host interactions in single cells over time. A.**  
550 Schematic representation of the screen. A CFP-expressing HSV1 was allowed to adsorb to clones  
551 seeded in 12-well plates for 30 minutes, washed out and cells subsequently imaged every 20  
552 minutes for 12 hour. Overall, more than 50,000 single cells were followed, from ~400 different

553 YFP-expressing clones **B.** Model for de-mixing primary and secondary infections. Shown are the  
554 measured lag-times between virus adsorption and CFP expression (gray bars), the fitted model  
555 (blue line) which is based on primary (red dashed line) and secondary (purple dashed line)  
556 infections. See Supplementary Fig. 2 for more information. **C.** A supervised machine learning  
557 approach was used to predict infection outcome from the cell images at the time of virus  
558 adsorption. See Fig. 2 for more information. **D.** Specific changes in host proteins levels and  
559 localization upon HSV1 infection were studied. Shown is an example of a localization change in  
560 cells infected by HSV1. See figures 5 and 6 for more information.

561

562 **Figure 2. HSV1 infection outcome can be predicted from images of the cells at the time of**  
563 **adsorption. A.** Schematic representation of the machine learning approach; First, image-analysis  
564 features were extracted for each cell from the phase and mCherry channels. Second, of the 418  
565 features calculated for each cell, we chose the top 20 most explanatory features to continue with.  
566 The full list of features with their relative explanatory power is listed in Supplementary Table 1.  
567 We trained a supervised machine learning classifier to best discriminate cells that will become  
568 successfully infected from those that will not and tested its performance on a separate test set. **B.**  
569 The top 20 ranking image-analysis features that were used for predicting infection outcome. For  
570 convenience we color coded the features according to the next groups: Texture (gray) - all  
571 textural features, extracted from either the phase or mCherry channel. Velocity (green) -  
572 normalized (feature ranked #2) or raw (#18). mCherry (Purpule) - normalized mCherry  
573 concentration (#3), raw nuclear mCherry level (#15), normalized mCherry level (#20). Cell-cycle  
574 position at the time of infection (yellow). Cell size (red) - nuclear area (#10), change in  
575 normalized cell width (#17). Cell Shape (blue) – normalized cell roundness (#11), cell  
576 eccentricity (#16). **C.** ROC curves for the trained classifier (blue line) and a random prediction  
577 (dashed black line) The area under the curves are noted in corresponding colors. **D,E,F.**  
578 Probability for cells to become infected, based on three different cellular features at time zero. **D** -  
579 cluster prominence (textural feature), **E** - cell velocity and **F** - cell-cycle position. **G.** Their mean  
580 classifier score in cells that will become infected (blue) or nor-infected (red) over 24 hours,  
581 aligned by their cell-cycle position. The figure shows the clear cell-cycle dependency for  
582 infection outcome, as well as the cell-cycle independent component, as the two curves never cross  
583 each other. **H.** Correct classification can also be done using images of cells prior to the addition  
584 of the virus. A second, smaller dataset was constructed in which cells were first imaged for 24

585 hours and then infected. Shown are the classifier performances based on the raw predictor score  
586 (purple line) or after normalizing by the cell-cycle stage (yellow line).

587

588 **Figure 3. Cells in the early part of the cell-cycle are more susceptible to HSV1 infection. A.**

589 The fraction difference in YFP concentration between infected and non-infected cells over the  
590 first nine hour after adsorption. The majority of the clones (grey lines) showed differences in the  
591 range of  $\pm 0.2$  (20%), which are within experimental error. Four clones are highlighted. Geminin  
592 (dashed green line) and RFX7 (dashed purple line) concentrations are lower in cells that will  
593 become infected at time zero. SUMO2 (red line) and RPAP3 (blue line) concentration decrease  
594 over time, specifically in cells that will become infected. **B.** Geminin and RFX7 concentration  
595 (mean $\pm$ s.e.m) in cells that will become infected (blue bars) or not-infected (red bars) at time zero.  
596 \* p-value<0.05, \*\* p-value<0.01. Both were calculated based on a one-tailed t-test. **C,D.** Geminin  
597 (C) and RFX7 (D) concentration (mean $\pm$ s.e.m) over time in cells that will become infected (blue  
598 lines) or not-infected (red lines). **E.** Geminin (green line) and RFX7 (purple line) concentration  
599 are cell-cycle dependent. The gray line depicts the median behavior of all other clones in the  
600 screen. **F.** Representing images of cells expressing YFP-Geminin (top row) or YFP-RFX7  
601 (bottom row) at different times post-mitosis. **G,H.** Distribution of DNA content in cells 15  
602 minutes (G) and 8 hours (H) after release from double-thymidine block. **I,J.** Accumulation of  
603 infected cells (CFP<sup>+</sup>) as a function of time for cells enriched for the G1 and S (blue lines) or  
604 G2/M (red lines) stages, infected with HSV1 at an moi of 0.25 (I) or 0.5 (J). mean $\pm$ s.e.m from six  
605 positions for each moi.

606

607 **Figure 4. The cell-cycle stage of the host cell impact HSV1 kinetics. A.** Data points (circles)  
608 and models (lines) fitted to cells infected at the early part of the cell-cycle (G1 and early S) or the  
609 late part of the cell-cycle (late S and G2/M). Cells in the G1 and early S stages show a faster  
610 kinetics with shorter lag times. **B.** Best estimated parameters for the Gamma distributions of  
611 primary infection kinetics shown in A. Cells at the later stages of the cell-cycle (Late S and  
612 G2/M) showed a 21% decrease in the rate parameter  $\beta$ . The shape parameter  $\alpha$  was largely  
613 unaffected, showing a 6% difference. **C.** Data points (circles) and models (lines) fitted to cells  
614 binned by their effective moi. Infection kinetics is faster as the effective moi increases. **D.** Best  
615 estimated parameters for the Gamma distributions of primary infection kinetics shown in C. The

616 rate parameter  $\beta$  increases as the effective moi increases, while the shape parameter  $\alpha$  remains  
617 largely unaffected, with a slight increase (4%) at the lowest moi.

618

619 **Figure 5. SUMO2 and RPAP3 degradation upon HSV1 infection is facilitated by ICP0. A,B.**

620 Images of representing cells from time-lapse movies of SUMO2 (A) and RPAP3 (B). Shown are  
621 the YFP channel, CFP channel and a merged image including the phase channel at 0-9 hours post

622 wild-type HSV1 adsorption. **C,D.** mean $\pm$ s.e.m of SUMO2 (C) and RPAP3 (D) concentrations in

623 non-infected (red) and infected (blue) cells following wild-type HSV1 adsorption. **E,F.**

624 mean $\pm$ s.e.m of SUMO2 (E) and RPAP3 (F) concentrations in non-infected (red) and infected

625 (blue) cells following infection by a mutant HSV1 that does not express ICP0

626 **Figure 6. SLTM and YTHDC1 localization change upon HSV1 infection is facilitated by**

627 **ICP0. A.** The fraction difference in YFP nuclear cv between infected and non-infected cells over  
628 the first nine hour after adsorption. The majority of the clones (grey lines) did not show

629 significant changes. Three clones are highlighted; SLTM (red line) and YTHDC1 (purple line)

630 which show an increase in nuclear cv and RPAP3 (blue line) which shows a decrease in nuclear

631 cv. **B,C.** Images of representing cells from time-lapse movies of SLTM (B) and YTHDC1 (D).

632 Shown are the YFP channel, CFP channel and a merged image including the phase channel at 0-9

633 hours post wild-type HSV1 adsorption. **D.** Cells infected by wild-type HSV1 were fixed and

634 stained for ICP4 or ICP8 at six hours post adsorption and imaged using a X100 magnification

635 lens. Shown are representative images of nuclear foci formed by SLTM (top two rows) or

636 YTHDC1 (bottom two rows), which do not co-localize with ICP4 or ICP8. Cellular DNA was

637 stained with DAPI (blue). **E,F.** SLTM (E) and YTHDC1 (F) nuclear cv (mean $\pm$ s.e.m) in non-

638 infected (red) and infected (blue) cells following wild-type HSV1 adsorption. **G,H.** nuclear cv

639 (mean $\pm$ s.e.m) of SLTM (G) and YTHDC1 (H) in non-infected (red) and infected (blue) cells

640 following infection by a mutant HSV1 that does not express ICP0.

641

## 642 REFERENCES

643 Abrisch, R.G., Eidem, T.M., Yakovchuk, P., Kugel, J.F., and Goodrich, J.A. (2015). Infection by  
644 Herpes Simplex Virus 1 Causes Near-Complete Loss of RNA Polymerase II Occupancy on the Host  
645 Cell Genome. *J. Virol.* *90*, 2503–2513.

- 646 Blasi, T., Hennig, H., Summers, H.D., Theis, F.J., Cerveira, J., Patterson, J.O., Davies, D., Filby, A.,  
647 Carpenter, A.E., and Rees, P. (2016). Label-free cell cycle analysis for high-throughput imaging  
648 flow cytometry. *Nat. Commun.* *7*, 10256.
- 649 Bootsma, D., Budke, L., and Vos, O. (1964). STUDIES ON SYNCHRONOUS DIVISION OF TISSUE  
650 CULTURE CELLS INITIATED BY EXCESS THYMIDINE. *Exp. Cell Res.* *33*, 301–309.
- 651 Cai, W., and Schaffer, P.A. (1991). A cellular function can enhance gene expression and plating  
652 efficiency of a mutant defective in the gene for ICPO, a transactivating protein of herpes simplex  
653 virus type 1. *J. Virol.* *65*, 4078–4090.
- 654 Chan, C.W., Lee, Y.-B., Uney, J., Flynn, A., Tobias, J.H., and Norman, M. (2007). A novel member  
655 of the SAF (scaffold attachment factor)-box protein family inhibits gene expression and induces  
656 apoptosis. *Biochem. J.* *407*, 355–362.
- 657 Chu, C., Zhang, Q.C., da Rocha, S.T., Flynn, R.A., Bharadwaj, M., Calabrese, J.M., Magnuson, T.,  
658 Heard, E., and Chang, H.Y. (2015). Systematic discovery of Xist RNA binding proteins. *Cell* *161*,  
659 404–416.
- 660 Cohen, A.A., Geva-Zatorsky, N., Eden, E., Frenkel-Morgenstern, M., Issaeva, I., Sigal, A., Milo, R.,  
661 Cohen-Saidon, C., Liron, Y., Kam, Z., et al. (2008). Dynamic proteomics of individual cancer cells  
662 in response to a drug. *Science* *322*, 1511–1516.
- 663 Cohen, G.H., Vaughan, R.K., and Lawrence, W.C. (1971). Deoxyribonucleic acid synthesis in  
664 synchronized mammalian KB cells infected with herpes simplex virus. *J. Virol.* *7*, 783–791.
- 665 Combe, M., Garijo, R., Geller, R., Cuevas, J.M., and Sanjuán, R. (2015). Single-Cell Analysis of RNA  
666 Virus Infection Identifies Multiple Genetically Diverse Viral Genomes within Single Infectious  
667 Units. *Cell Host Microbe* *18*, 424–432.
- 668 Criddle, A., Thornburg, T., Kochetkova, I., DePartee, M., and Taylor, M.P. (2016). gD-  
669 Independent Superinfection Exclusion of Alpha herpesviruses. *J. Virol.* *90*, 4049–4058.
- 670 Delbrück, M. (1945). The Burst Size Distribution in the Growth of Bacterial Viruses  
671 (Bacteriophages)1. *J. Bacteriol.* *50*, 131–135.
- 672 Dominissini, D., Moshitch-Moshkovitz, S., Schwartz, S., Salmon-Divon, M., Ungar, L., Osenberg,  
673 S., Cesarkas, K., Jacob-Hirsch, J., Amariglio, N., Kupiec, M., et al. (2012). Topology of the human  
674 and mouse m6A RNA methylomes revealed by m6A-seq. *Nature* *485*, 201–206.
- 675 Eden, E., Geva-Zatorsky, N., Issaeva, I., Cohen, A., Dekel, E., Danon, T., Cohen, L., Mayo, A., and  
676 Alon, U. (2011). Proteome half-life dynamics in living human cells. *Science* *331*, 764–768.
- 677 Ehmann, G.L., McLean, T.I., and Bachenheimer, S.L. (2000). Herpes simplex virus type 1 infection  
678 imposes a G(1)/S block in asynchronously growing cells and prevents G(1) entry in quiescent  
679 cells. *Virology* *267*, 335–349.
- 680 Elowitz, M.B., Levine, A.J., Siggia, E.D., and Swain, P.S. (2002). Stochastic Gene Expression in a  
681 Single Cell. *Science* *297*, 1183–1186.

- 682 Farkash-Amar, S., Zimmer, A., Eden, E., Cohen, A., Geva-Zatorsky, N., Cohen, L., Milo, R., Sigal, A.,  
683 Danon, T., and Alon, U. (2014). Noise genetics: inferring protein function by correlating  
684 phenotype with protein levels and localization in individual human cells. *PLoS Genet.* *10*,  
685 e1004176.
- 686 Floyd, D.L., Ragains, J.R., Skehel, J.J., Harrison, S.C., and van Oijen, A.M. (2008). Single-particle  
687 kinetics of influenza virus membrane fusion. *Proc. Natl. Acad. Sci. U. S. A.* *105*, 15382–15387.
- 688 Fontes, J.D., Jabrane-Ferrat, N., and Peterlin, B.M. (1997). Assembly of functional regulatory  
689 complexes on MHC class II promoters in vivo. *J. Mol. Biol.* *270*, 336–345.
- 690 Gardner, M.K., Zanic, M., Gell, C., Bormuth, V., and Howard, J. (2011). Depolymerizing Kinesins  
691 Kip3 and MCAK Shape Cellular Microtubule Architecture by Differential Control of Catastrophe.  
692 *Cell* *147*, 1092–1103.
- 693 Geva-Zatorsky, N., Dekel, E., Cohen, A.A., Danon, T., Cohen, L., and Alon, U. (2010). Protein  
694 dynamics in drug combinations: a linear superposition of individual-drug responses. *Cell* *140*,  
695 643–651.
- 696 Goedhart, J., von Stetten, D., Noirclerc-Savoye, M., Lelimosin, M., Joosen, L., Hink, M.A., van  
697 Weeren, L., Gadella, T.W.J., and Royant, A. (2012). Structure-guided evolution of cyan  
698 fluorescent proteins towards a quantum yield of 93%. *Nat. Commun.* *3*, 751.
- 699 Gupton, S.L., and Gertler, F.B. (2007). Filopodia: The Fingers That Do the Walking. *Sci STKE* *2007*,  
700 re5-re5.
- 701 Gut, G., Tadmor, M.D., Pe'er, D., Pelkmans, L., and Liberali, P. (2015). Trajectories of cell-cycle  
702 progression from fixed cell populations. *Nat. Methods* *12*, 951–954.
- 703 Haralick RM, Shanmuga K, Dinstein I (1973). Textural features for image classification. *IEEE Trans*  
704 *Syst Man Cybern* *3*: 610-621. *Syst. Man Cybern. IEEE Trans. On SMC3*, 610–621.
- 705 Hardy, W.R., and Sandri-Goldin, R.M. (1994). Herpes simplex virus inhibits host cell splicing, and  
706 regulatory protein ICP27 is required for this effect. *J. Virol.* *68*, 7790–7799.
- 707 Heldt, F.S., Kupke, S.Y., Dorl, S., Reichl, U., and Frensing, T. (2015). Single-cell analysis and  
708 stochastic modelling unveil large cell-to-cell variability in influenza A virus infection. *Nat.*  
709 *Commun.* *6*.
- 710 Hobbs, W.E., and DeLuca, N.A. (1999). Perturbation of cell cycle progression and cellular gene  
711 expression as a function of herpes simplex virus ICP0. *J. Virol.* *73*, 8245–8255.
- 712 Jenkins, H.L., and Spencer, C.A. (2001). RNA polymerase II holoenzyme modifications accompany  
713 transcription reprogramming in herpes simplex virus type 1-infected cells. *J. Virol.* *75*, 9872–  
714 9884.
- 715 Kafri, R., Levy, J., Ginzberg, M.B., Oh, S., Lahav, G., and Kirschner, M.W. (2013). Dynamics  
716 extracted from fixed cells reveal feedback linking cell growth to cell cycle. *Nature* *494*, 480–483.

- 717 Kellogg, R.A., and Tay, S. (2015). Noise facilitates transcriptional control under dynamic inputs.  
718 *Cell* 160, 381–392.
- 719 Koyama, A.H., and Uchida, T. (1987). The mode of entry of herpes simplex virus type 1 into Vero  
720 cells. *Microbiol. Immunol.* 31, 123–130.
- 721 Lee, J.S., Raja, P., and Knipe, D.M. (2016). Herpesviral ICP0 Protein Promotes Two Waves of  
722 Heterochromatin Removal on an Early Viral Promoter during Lytic Infection. *mBio* 7, e02007-  
723 2015.
- 724 Lindberg, A., and Kreivi, J.-P. (2002). Splicing inhibition at the level of spliceosome assembly in  
725 the presence of herpes simplex virus protein ICP27. *Virology* 294, 189–198.
- 726 Loewer, A., and Lahav, G. (2011). We are all individuals: causes and consequences of non-  
727 genetic heterogeneity in mammalian cells. *Curr. Opin. Genet. Dev.* 21, 753–758.
- 728 Lomonte, P., and Everett, R.D. (1999). Herpes simplex virus type 1 immediate-early protein  
729 Vmw110 inhibits progression of cells through mitosis and from G(1) into S phase of the cell  
730 cycle. *J. Virol.* 73, 9456–9467.
- 731 McGarry, T.J., and Kirschner, M.W. (1998). Geminin, an Inhibitor of DNA Replication, Is Degraded  
732 during Mitosis. *Cell* 93, 1043–1053.
- 733 Meyer, K.D., Saletore, Y., Zumbo, P., Elemento, O., Mason, C.E., and Jaffrey, S.R. (2012).  
734 Comprehensive Analysis of mRNA Methylation Reveals Enrichment in 3' UTRs and near Stop  
735 Codons. *Cell* 149, 1635–1646.
- 736 von Morgen, P., Hořejší, Z., and Macurek, L. (2015). Substrate recognition and function of the  
737 R2TP complex in response to cellular stress. *Front. Genet.* 6, 69.
- 738 Nayler, O., Strätling, W., Bourquin, J.P., Stagljar, I., Lindemann, L., Jasper, H., Hartmann, A.M.,  
739 Fackelmayer, F.O., Ullrich, A., and Stamm, S. (1998). SAF-B protein couples transcription and  
740 pre-mRNA splicing to SAR/MAR elements. *Nucleic Acids Res.* 26, 3542–3549.
- 741 Paladino, P., Marcon, E., Greenblatt, J., and Frappier, L. (2014). Identification of herpesvirus  
742 proteins that contribute to G1/S arrest. *J. Virol.* 88, 4480–4492.
- 743 Parker, R.F. (1938). STATISTICAL STUDIES OF THE NATURE OF THE INFECTIOUS UNIT OF VACCINE  
744 VIRUS. *J. Exp. Med.* 67, 725–738.
- 745 Pasiaka, T.J., Lu, B., Crosby, S.D., Wylie, K.M., Morrison, L.A., Alexander, D.E., Menachery, V.D.,  
746 and Leib, D.A. (2008). Herpes Simplex Virus Virion Host Shutoff Attenuates Establishment of the  
747 Antiviral State. *J. Virol.* 82, 5527–5535.
- 748 Razooky, B.S., Pai, A., Aull, K., Rouzine, I.M., and Weinberger, L.S. (2015). A hardwired HIV  
749 latency program. *Cell* 160, 990–1001.



- 750 Rice, S.A., Long, M.C., Lam, V., and Spencer, C.A. (1994). RNA polymerase II is aberrantly  
751 phosphorylated and localized to viral replication compartments following herpes simplex virus  
752 infection. *J. Virol.* *68*, 988–1001.
- 753 Rivers, C., Idris, J., Scott, H., Rogers, M., Lee, Y.-B., Gaunt, J., Phylactou, L., Curk, T., Campbell, C.,  
754 Ule, J., et al. (2015). iCLIP identifies novel roles for SAFB1 in regulating RNA processing and  
755 neuronal function. *BMC Biol.* *13*, 111.
- 756 Rutkowski, A.J., Erhard, F., L'Hernault, A., Bonfert, T., Schilhabel, M., Crump, C., Rosenstiel, P.,  
757 Efstathiou, S., Zimmer, R., Friedel, C.C., et al. (2015). Widespread disruption of host transcription  
758 termination in HSV-1 infection. *Nat. Commun.* *6*, 7126.
- 759 Sahin, U., Ferhi, O., Carnec, X., Zamborlini, A., Peres, L., Jollivet, F., Vitaliano-Prunier, A., de Thé,  
760 H., and Lallemand-Breitenbach, V. (2014). Interferon controls SUMO availability via the Lin28  
761 and let-7 axis to impede virus replication. *Nat. Commun.* *5*, 4187.
- 762 Sakaue-Sawano, A., Kurokawa, H., Morimura, T., Hanyu, A., Hama, H., Osawa, H., Kashiwagi, S.,  
763 Fukami, K., Miyata, T., Miyoshi, H., et al. (2008). Visualizing spatiotemporal dynamics of  
764 multicellular cell-cycle progression. *Cell* *132*, 487–498.
- 765 Schulte, M.B., and Andino, R. (2014). Single-cell analysis uncovers extensive biological noise in  
766 poliovirus replication. *J. Virol.* *88*, 6205–6212.
- 767 Sciabica, K.S., Dai, Q.J., and Sandri-Goldin, R.M. (2003). ICP27 interacts with SRPK1 to mediate  
768 HSV splicing inhibition by altering SR protein phosphorylation. *EMBO J.* *22*, 1608–1619.
- 769 Sigal, A., Milo, R., Cohen, A., Geva-Zatorsky, N., Klein, Y., Alaluf, I., Swerdlin, N., Perzov, N.,  
770 Danon, T., Liron, Y., et al. (2006a). Dynamic proteomics in individual human cells uncovers  
771 widespread cell-cycle dependence of nuclear proteins. *Nat. Methods* *3*, 525–531.
- 772 Sigal, A., Milo, R., Cohen, A., Geva-Zatorsky, N., Klein, Y., Liron, Y., Rosenfeld, N., Danon, T.,  
773 Perzov, N., and Alon, U. (2006b). Variability and memory of protein levels in human cells. *Nature*  
774 *444*, 643–646.
- 775 Sigal, A., Danon, T., Cohen, A., Milo, R., Geva-Zatorsky, N., Lustig, G., Liron, Y., Alon, U., and  
776 Perzov, N. (2007). Generation of a fluorescently labeled endogenous protein library in living  
777 human cells. *Nat. Protoc.* *2*, 1515–1527.
- 778 Singh, A., and Weinberger, L.S. (2009). Stochastic gene expression as a molecular switch for viral  
779 latency. *Curr. Opin. Microbiol.* *12*, 460–466.
- 780 Sloan, E., Tatham, M.H., Gros Lambert, M., Glass, M., Orr, A., Hay, R.T., and Everett, R.D. (2015).  
781 Analysis of the SUMO2 Proteome during HSV-1 Infection. *PLOS Pathog* *11*, e1005059.
- 782 Smith, J.M. (1968). *Mathematical Ideas In Biology* (Cambridge: Cambridge University Press).
- 783 Snijder, B., Sacher, R., Rämö, P., Damm, E.-M., Liberali, P., and Pelkmans, L. (2009). Population  
784 context determines cell-to-cell variability in endocytosis and virus infection. *Nature* *461*, 520–  
785 523.

- 786 Snijder, B., Sacher, R., Rämö, P., Liberali, P., Mench, K., Wolfrum, N., Burleigh, L., Scott, C.C.,  
787 Verheije, M.H., Mercer, J., et al. (2012). Single-cell analysis of population context advances RNAi  
788 screening at multiple levels. *Mol. Syst. Biol.* *8*, 579.
- 789 Sodeik, B., Ebersold, M.W., and Helenius, A. (1997). Microtubule-mediated transport of  
790 incoming herpes simplex virus 1 capsids to the nucleus. *J. Cell Biol.* *136*, 1007–1021.
- 791 Song, B., Liu, J.J., Yeh, K.C., and Knipe, D.M. (2000). Herpes simplex virus infection blocks events  
792 in the G1 phase of the cell cycle. *Virology* *267*, 326–334.
- 793 Spencer, C.A., Dahmus, M.E., and Rice, S.A. (1997). Repression of host RNA polymerase II  
794 transcription by herpes simplex virus type 1. *J. Virol.* *71*, 2031–2040.
- 795 Stow, N.D., and Stow, E.C. (1986). Isolation and characterization of a herpes simplex virus type 1  
796 mutant containing a deletion within the gene encoding the immediate early polypeptide  
797 Vmw110. *J. Gen. Virol.* *67 ( Pt 12)*, 2571–2585.
- 798 St-Pierre, F., and Endy, D. (2008). Determination of cell fate selection during phage lambda  
799 infection. *Proc. Natl. Acad. Sci. U. S. A.* *105*, 20705–20710.
- 800 Szpara, M.L., Tafuri, Y.R., and Enquist, L.W. (2011). Preparation of viral DNA from nucleocapsids.  
801 *J. Vis. Exp. JoVE*.
- 802 Tay, S., Hughey, J.J., Lee, T.K., Lipniacki, T., Quake, S.R., and Covert, M.W. (2010). Single-cell NF-  
803 kappaB dynamics reveal digital activation and analogue information processing. *Nature* *466*,  
804 267–271.
- 805 Taylor, M.P., Koyuncu, O.O., and Enquist, L.W. (2011). Subversion of the actin cytoskeleton  
806 during viral infection. *Nat. Rev. Microbiol.* *9*, 427–439.
- 807 Timm, A., and Yin, J. (2012). Kinetics of virus production from single cells. *Virology* *424*, 11–17.
- 808 Unser, M. (1986). Sum and Difference Histograms for Texture Classification. *IEEE Trans. Pattern*  
809 *Anal. Mach. Intell.* *PAMI-8*, 118–125.
- 810 Wagner, E.K., and Roizman, B. (1969). Ribonucleic acid synthesis in cells infected with herpes  
811 simplex virus. I. Patterns of ribonucleic acid synthesis in productively infected cells. *J. Virol.* *4*,  
812 36–46.
- 813 Weighardt, F., Cobianchi, F., Cartegni, L., Chiodi, I., Villa, A., Riva, S., and Biamonti, G. (1999). A  
814 novel hnRNP protein (HAP/SAF-B) enters a subset of hnRNP complexes and relocates in nuclear  
815 granules in response to heat shock. *J. Cell Sci.* *112*, 1465–1476.
- 816 Weinberger, L.S., Burnett, J.C., Toettcher, J.E., Arkin, A.P., and Schaffer, D.V. (2005). Stochastic  
817 Gene Expression in a Lentiviral Positive-Feedback Loop: HIV-1 Tat Fluctuations Drive Phenotypic  
818 Diversity. *Cell* *122*, 169–182.
- 819 Willis, S.H., Rux, A.H., Peng, C., Whitbeck, J.C., Nicola, A.V., Lou, H., Hou, W., Salvador, L.,  
820 Eisenberg, R.J., and Cohen, G.H. (1998). Examination of the kinetics of herpes simplex virus

- 821 glycoprotein D binding to the herpesvirus entry mediator, using surface plasmon resonance. *J.*  
822 *Virol.* *72*, 5937–5947.
- 823 Xiao, W., Adhikari, S., Dahal, U., Chen, Y.-S., Hao, Y.-J., Sun, B.-F., Sun, H.-Y., Li, A., Ping, X.-L., Lai,  
824 W.-Y., et al. (2016). Nuclear m(6)A Reader YTHDC1 Regulates mRNA Splicing. *Mol. Cell* *61*, 507–  
825 519.
- 826 Zenner, H.L., Mauricio, R., Banting, G., and Crump, C.M. (2013). Herpes Simplex Virus 1  
827 Counteracts Tetherin Restriction via Its Virion Host Shutoff Activity. *J. Virol.* *87*, 13115–13123.
- 828 Zhu, Y., Yongky, A., and Yin, J. (2009). Growth of an RNA virus in single cells reveals a broad  
829 fitness distribution. *Virology* *385*, 39–46.
- 830
- 831
- 832

A

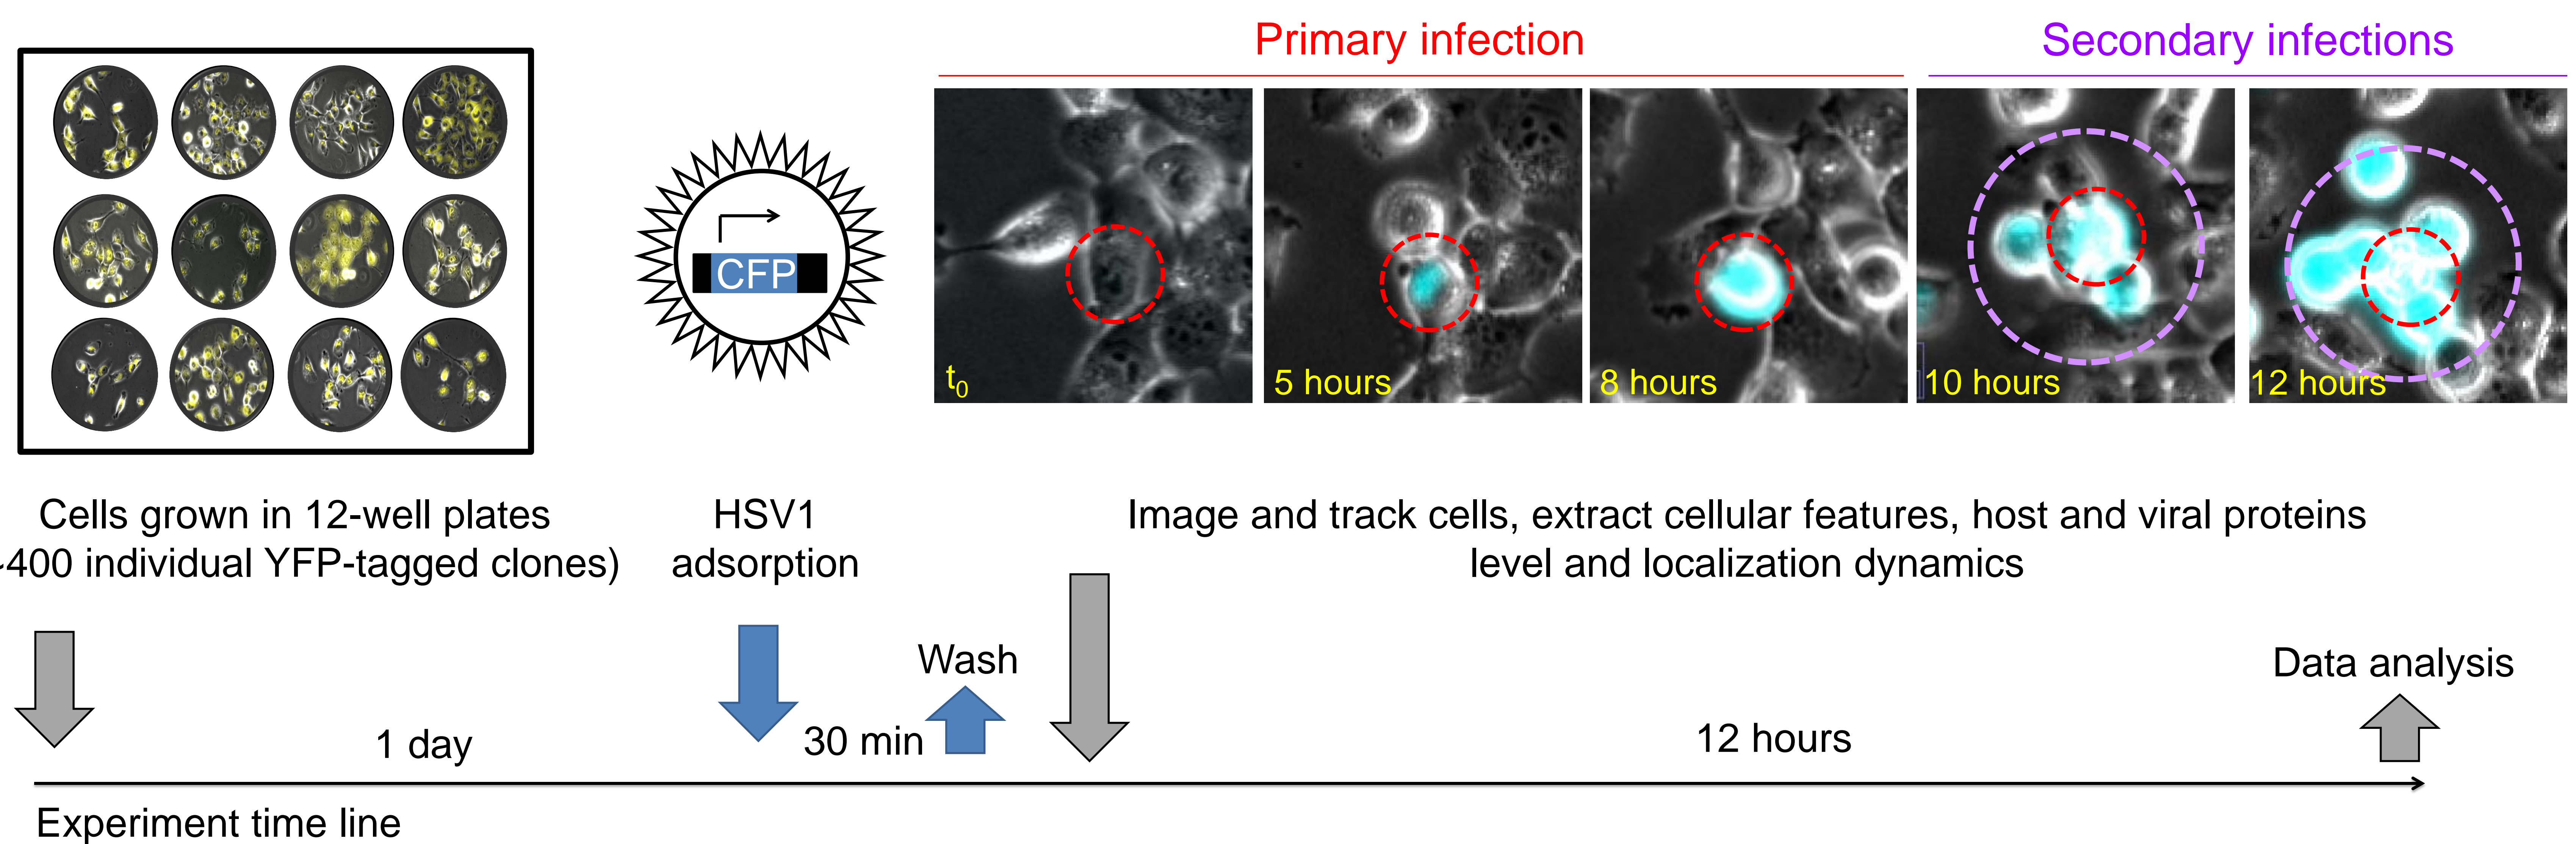

Tracking and image analysis of >50,000 single cells throughout the course of infection

B

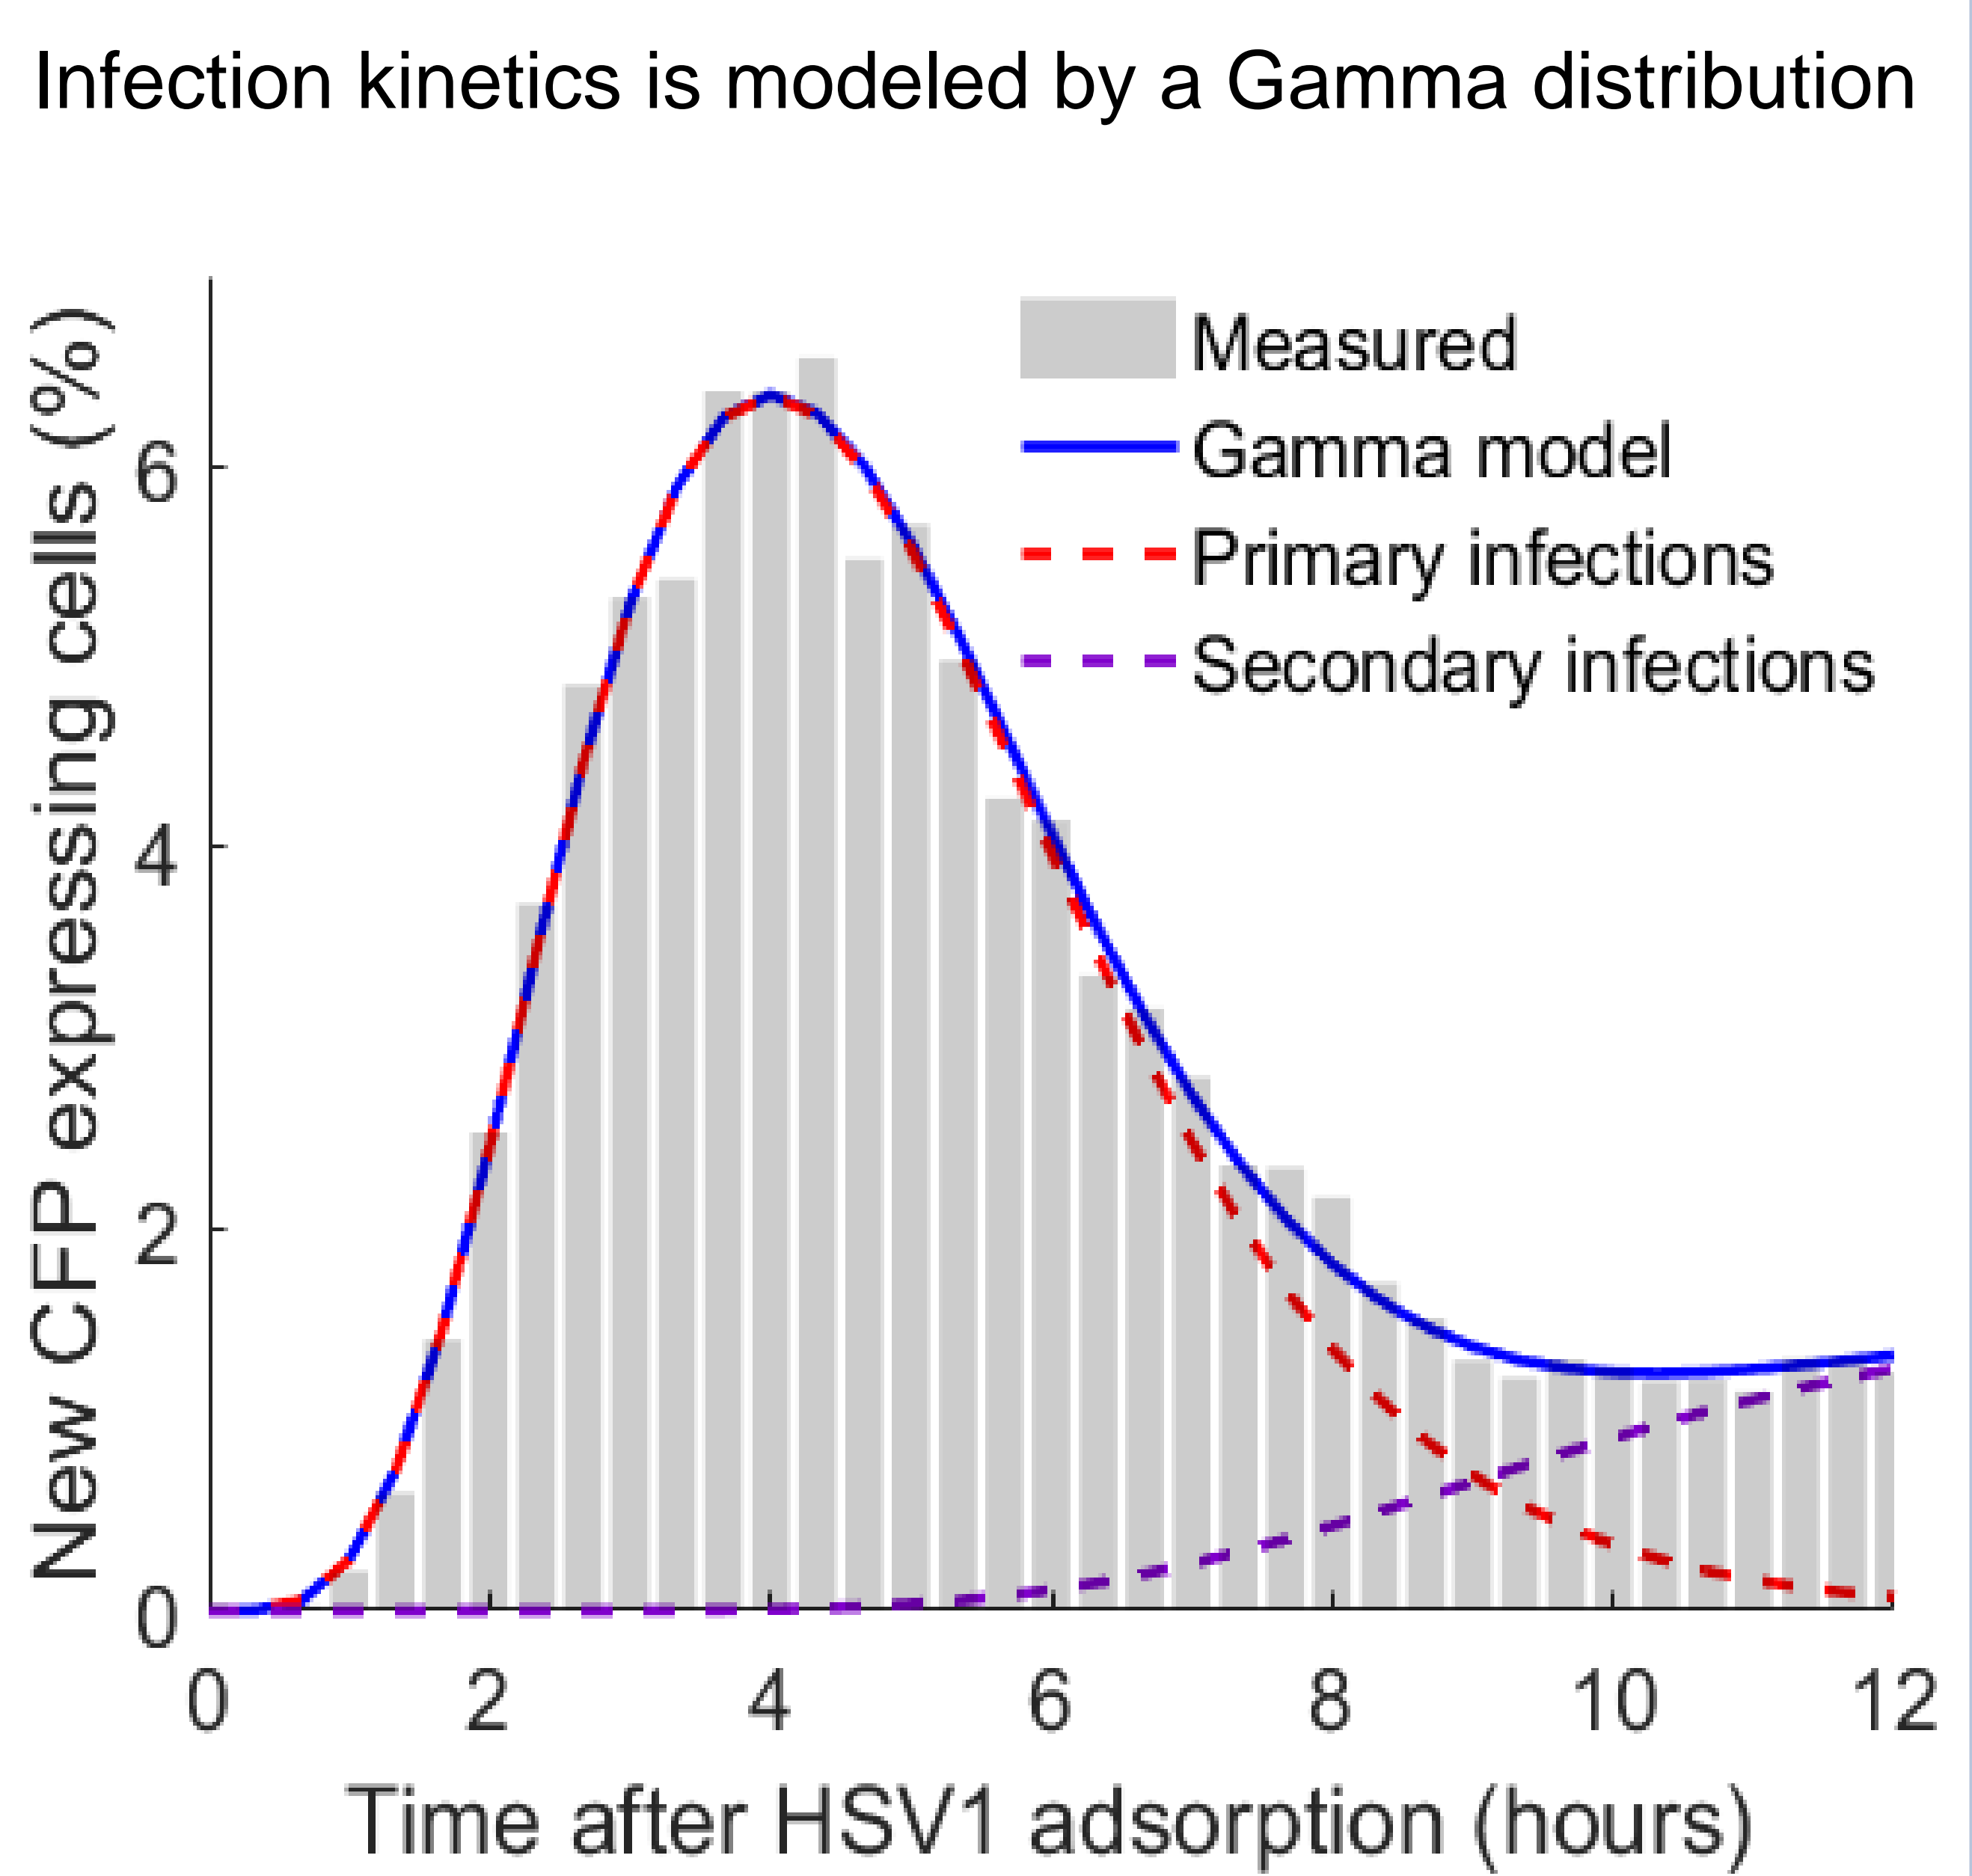

C

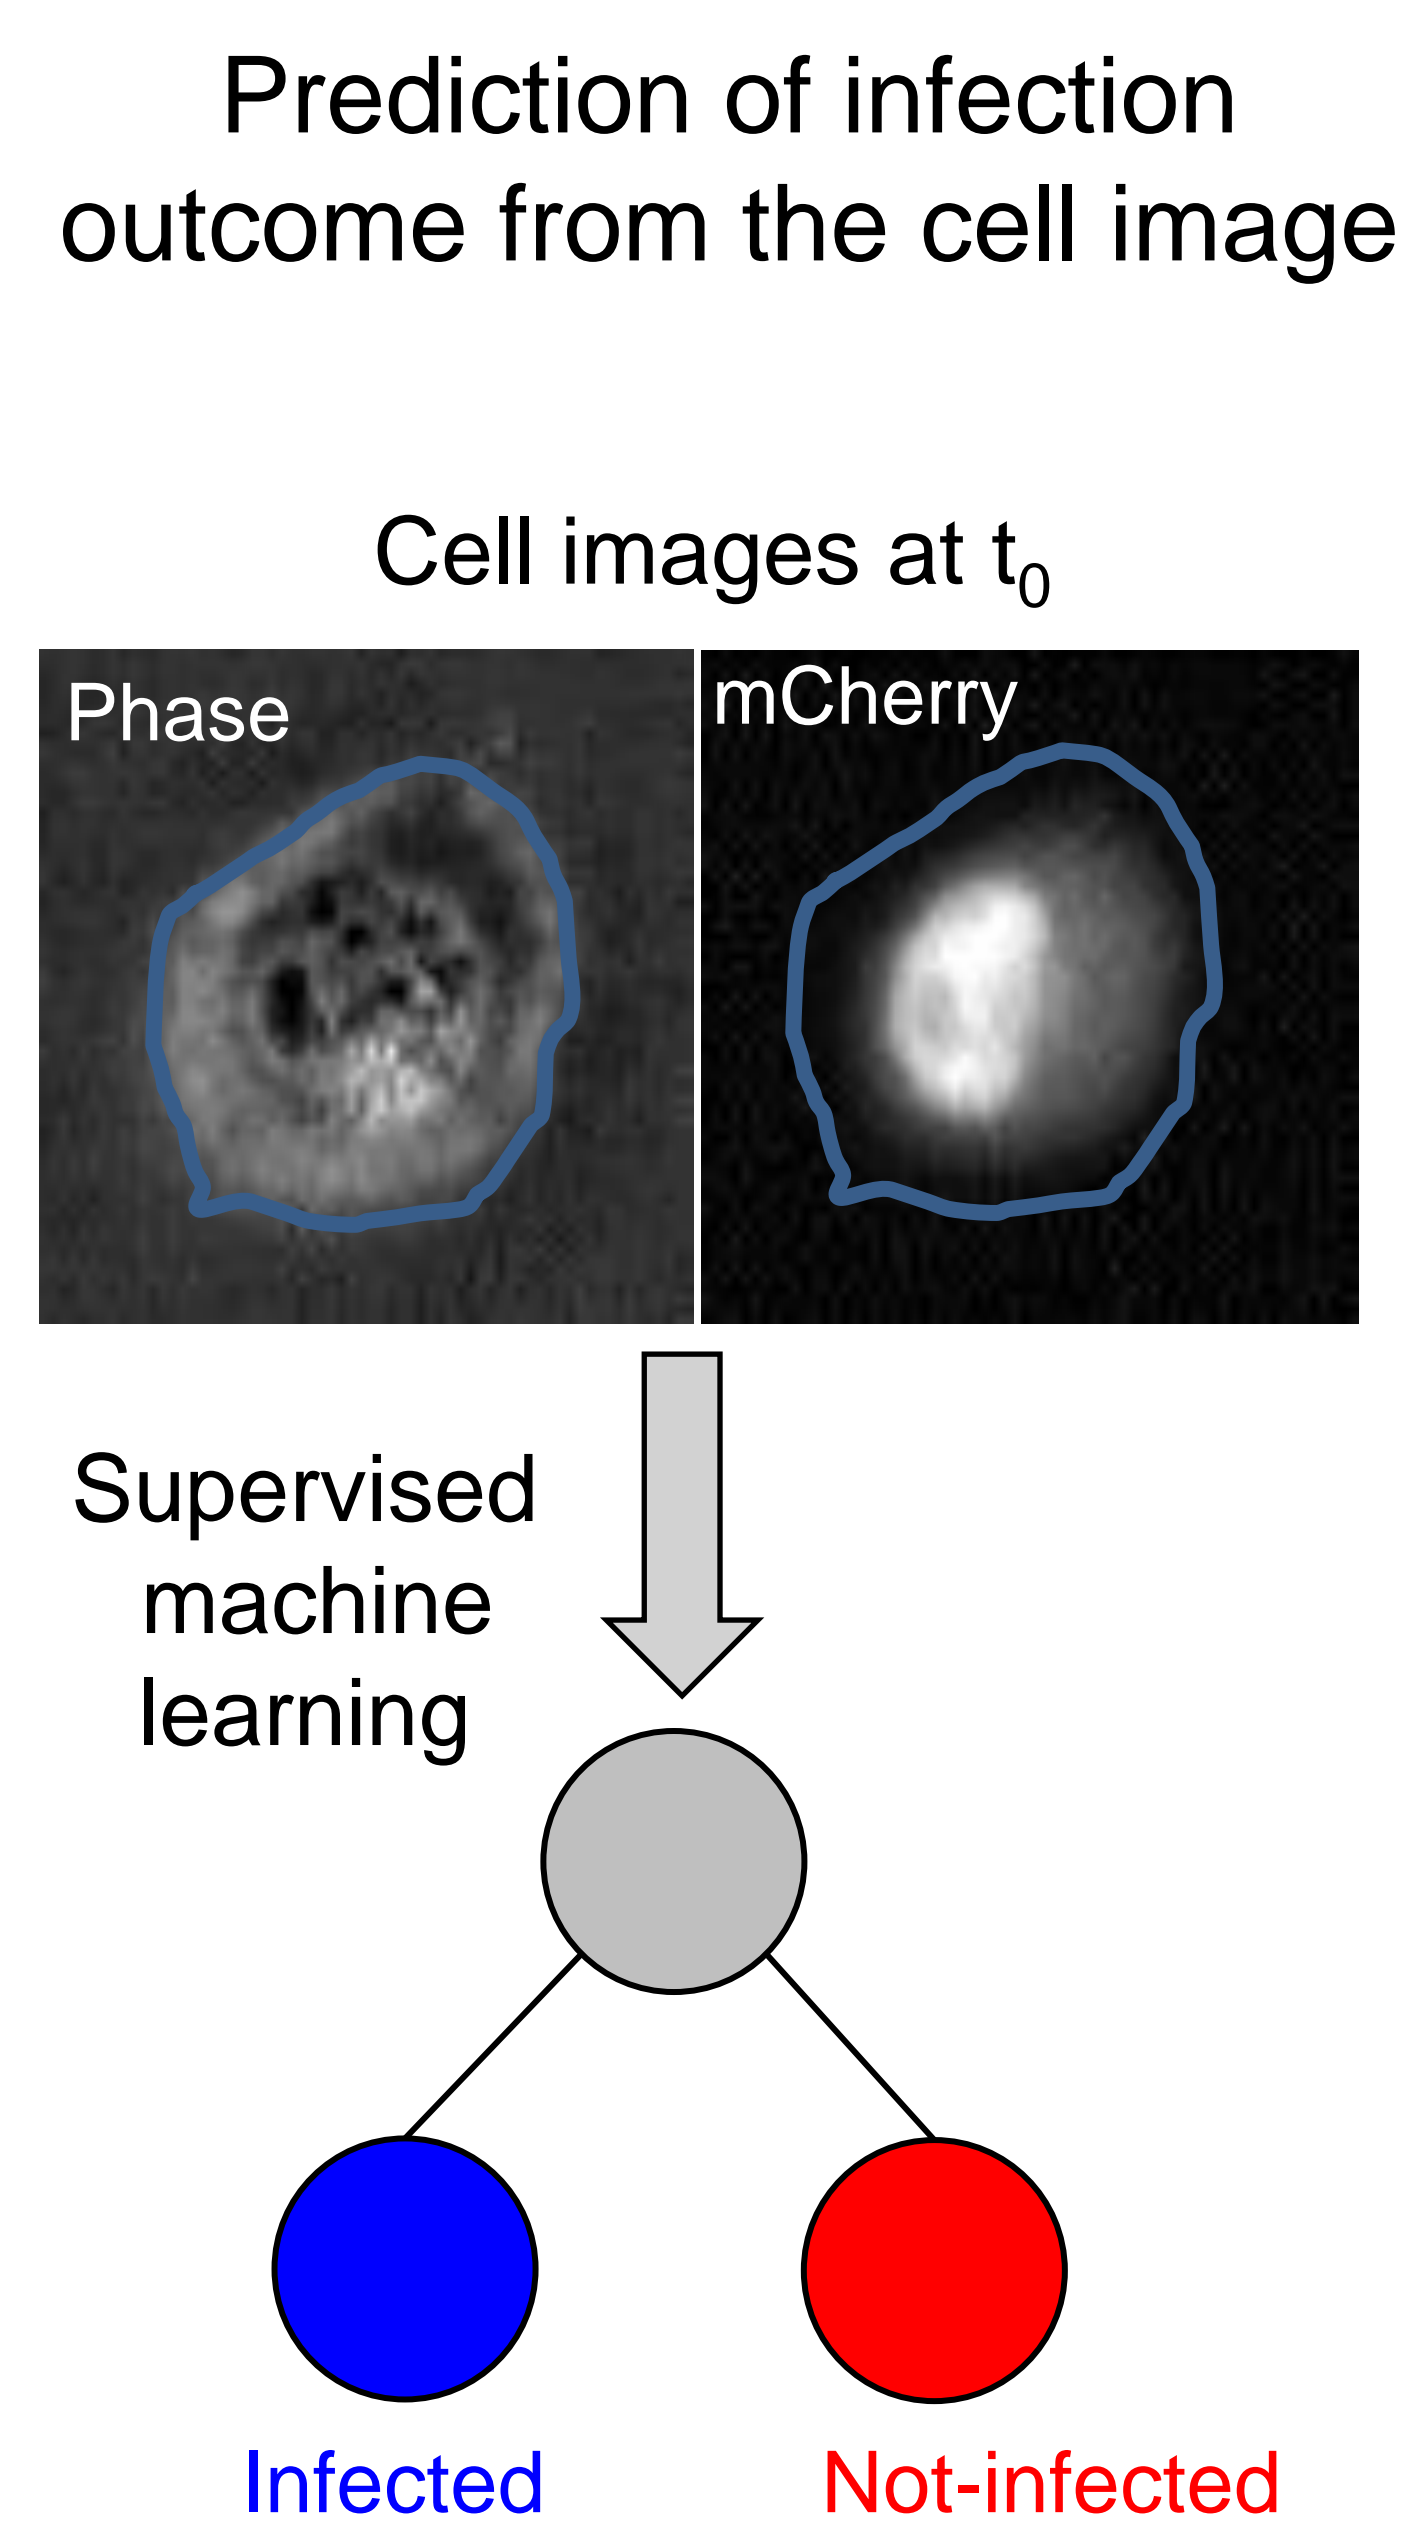

D

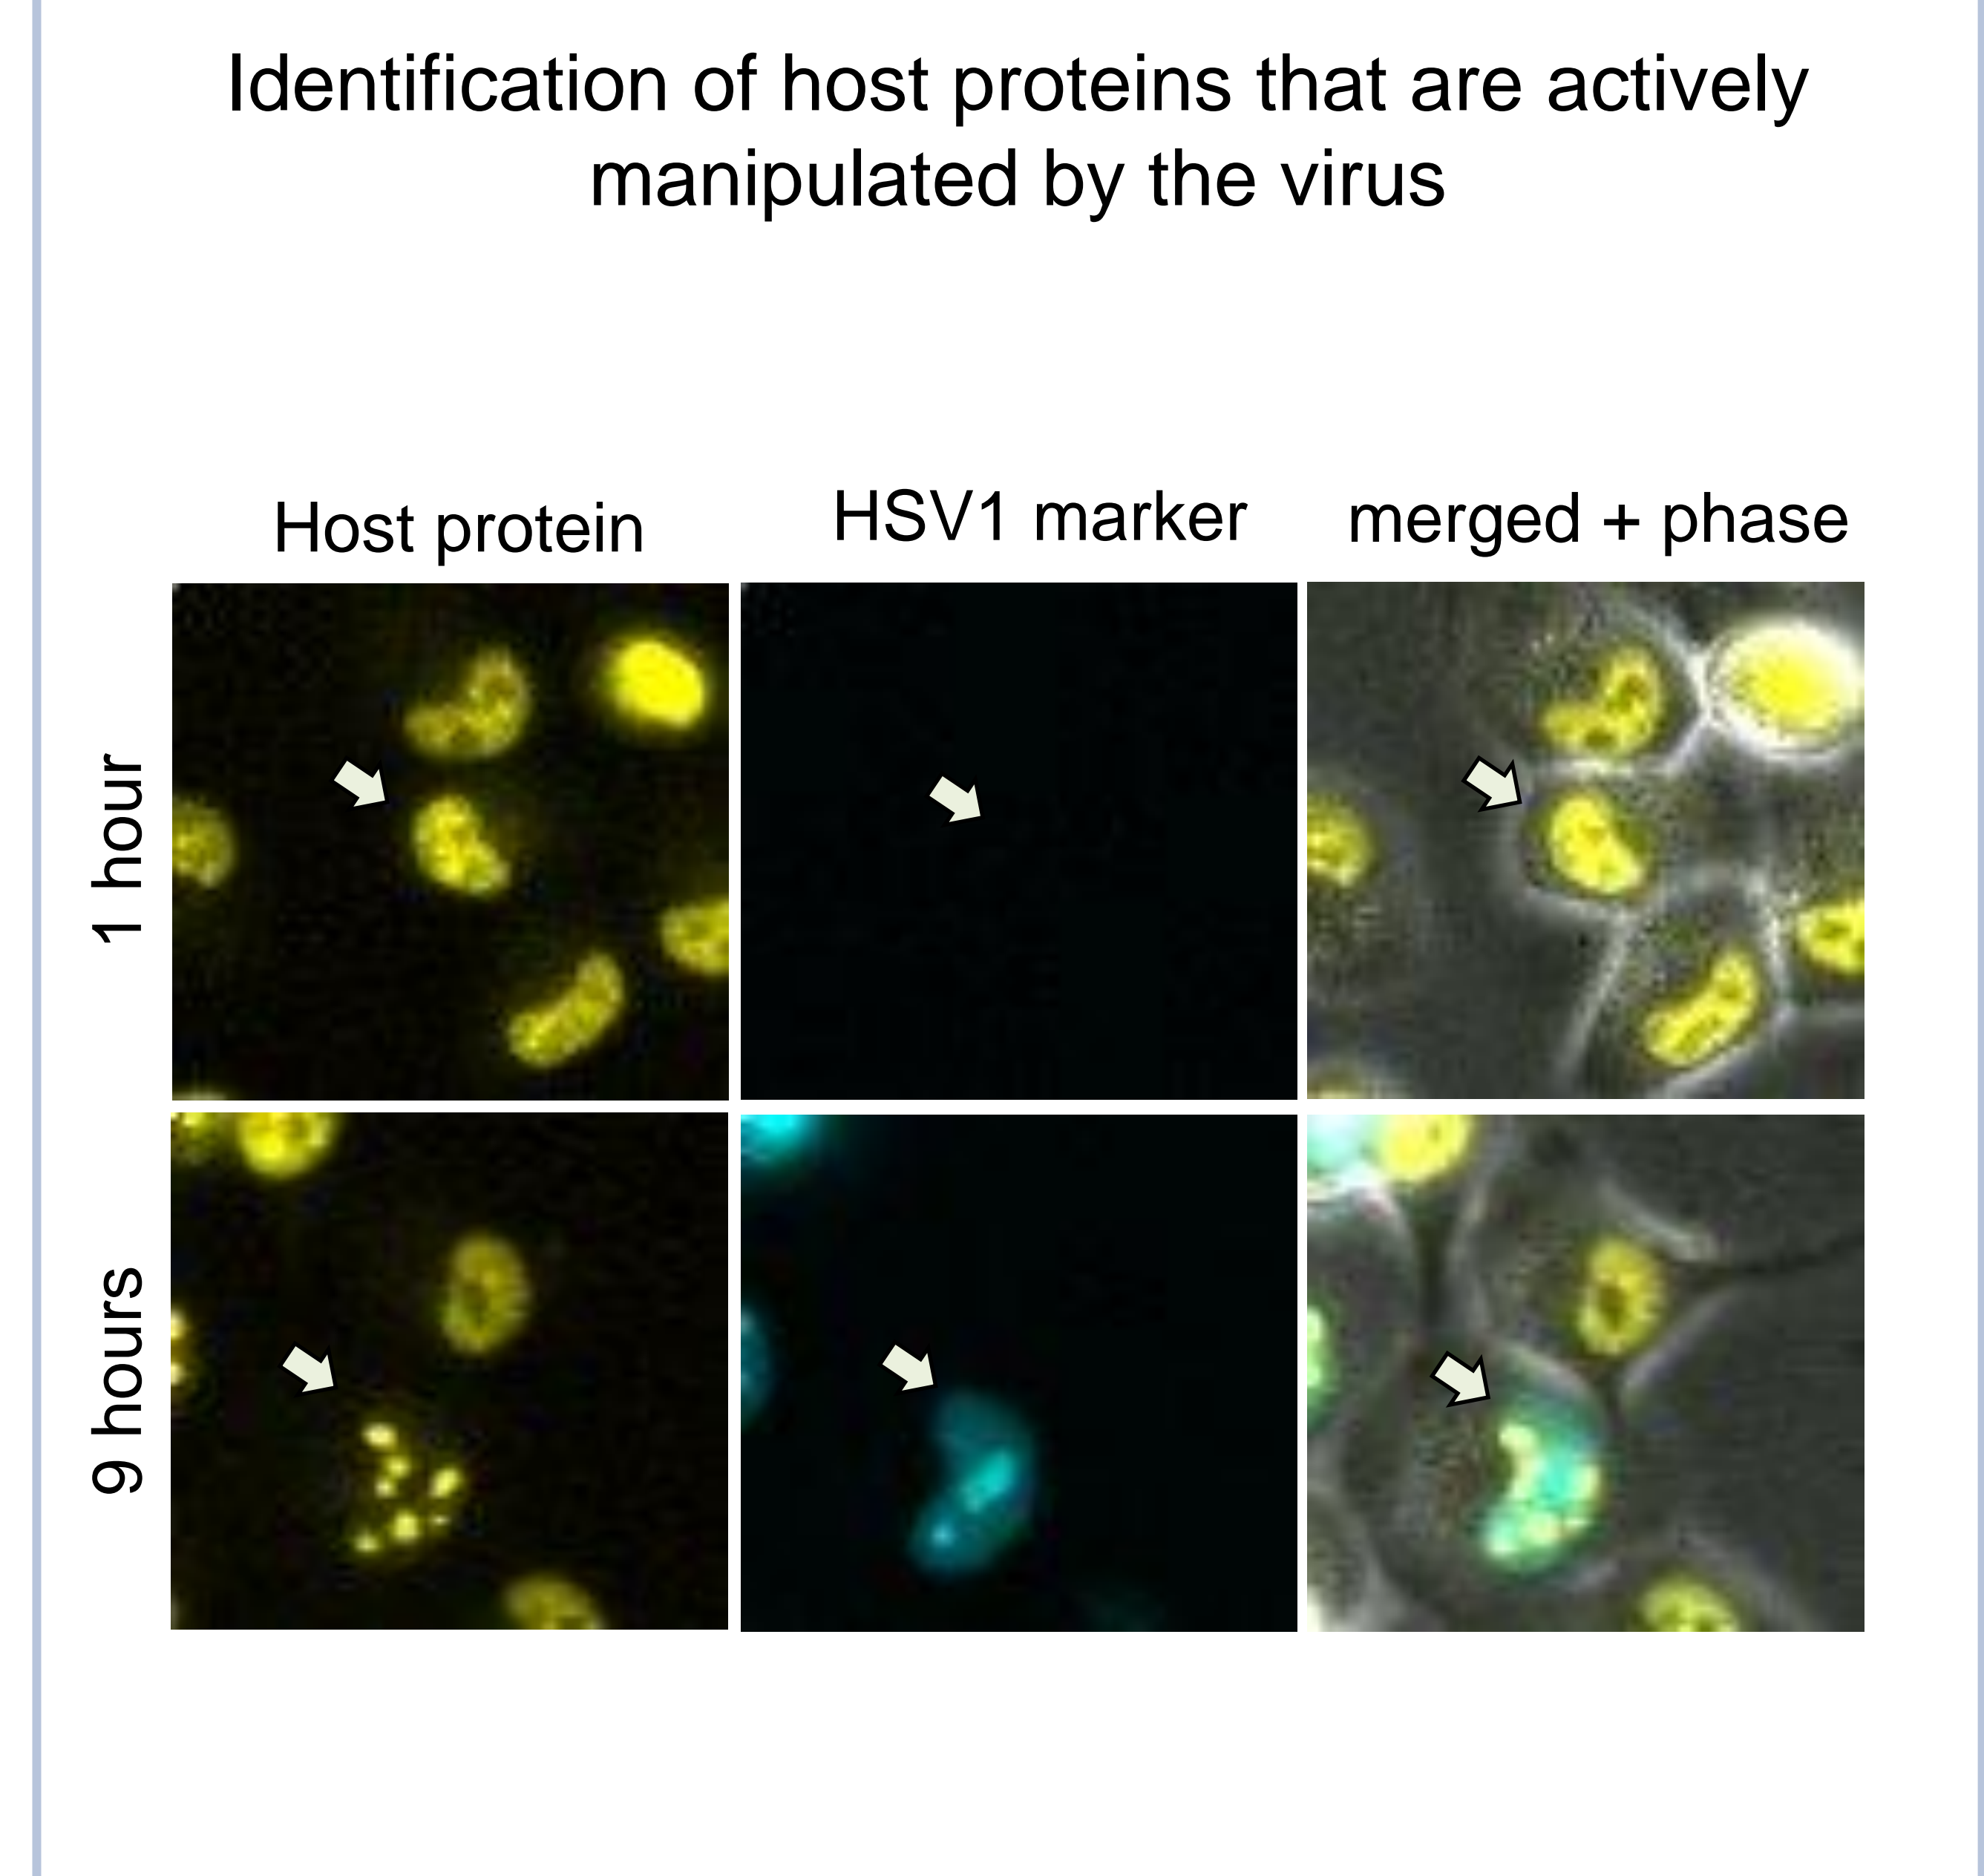

bioRxiv preprint doi: <https://doi.org/10.1101/081853>; this version posted October 19, 2016. The copyright holder for this preprint (which was not certified by peer review) is the author/funder. All rights reserved. No reuse allowed without permission.

### Figure 1. Dynamic proteomics to study virus-host interactions in single cells over time.

**A.** Schematic representation of the screen. A CFP-expressing HSV1 was allowed to adsorb to clones seeded in 12-well plates for 30 minutes, washed out and cells subsequently imaged every 20 minutes for 12 hours. Overall, more than 50,000 single cells were followed, from ~400 different YFP-expressing clones. **B.** Model for de-mixing primary and secondary infections. Shown are the measured lag-times between virus adsorption and CFP expression (gray bars), the fitted model (blue line) which is based on primary (red dashed line) and secondary (purple dashed line) infections. See Supplementary Fig. 2 for more information. **C.** A supervised machine learning approach was used to predict infection outcome from the cell images at the time of virus adsorption. See Fig. 2 for more information. **D.** Specific changes in host proteins levels and localization upon HSV1 infection were studied. Shown is an example of a localization change in cells infected by HSV1. See figures 5 and 6 for more information.

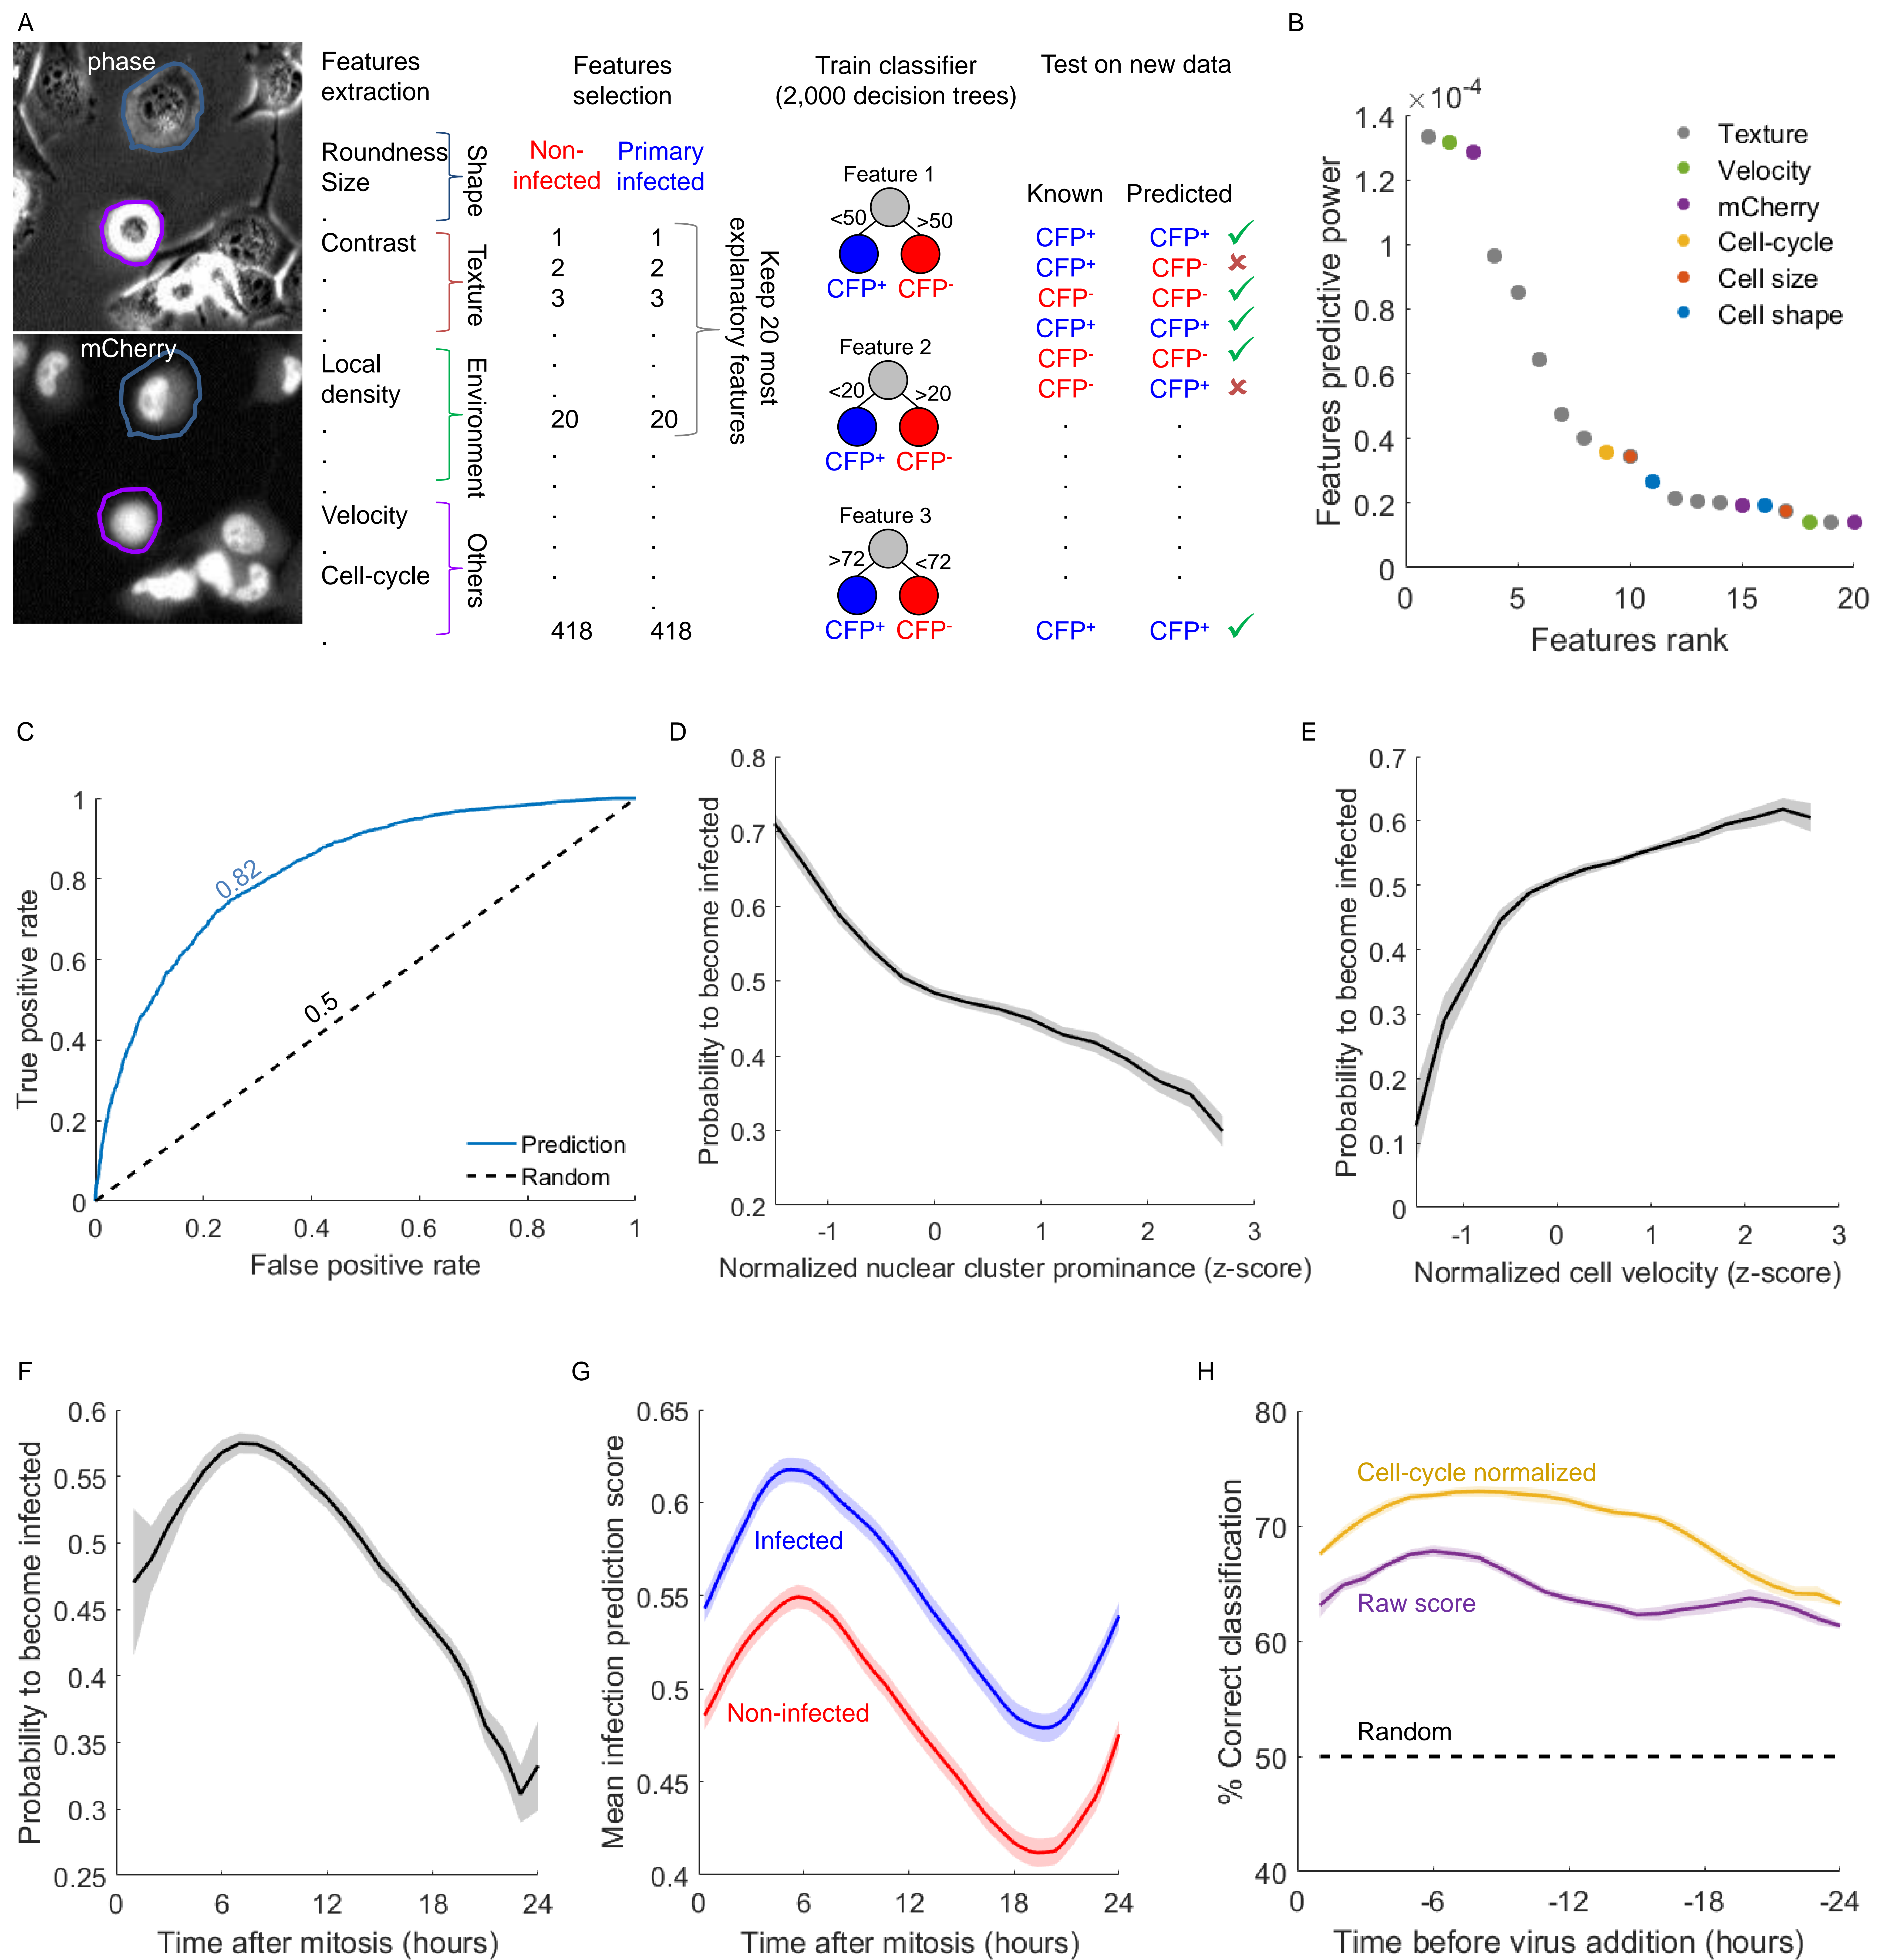

**Figure 2. HSV1 infection outcome can be predicted from images of the cells at the time of adsorption.**

**A.** Schematic representation of the machine learning approach; First, image-analysis features were extracted for each cell from the phase and mCherry channels. Second, of the 418 features calculated for each cell, we chose the top 20 most explanatory features to continue with. The full list of features with their relative explanatory power is listed in Supplementary Table 1. We trained a supervised machine learning classifier to best discriminate cells that will become successfully infected from those that will not and tested its performance on a separate test set. **B.** The top 20 ranking image-analysis features that were used for predicting infection outcome. For convenience we color coded the features according to the next groups: Texture (gray) - all textural features, extracted from either the phase or mCherry channel. Velocity (green) - normalized (feature ranked #2) or raw (#18). mCherry (Purple) - normalized mCherry concentration (#3), raw nuclear mCherry level (#15), normalized mCherry level (#20). Cell-cycle position at the time of infection (yellow). Cell size (red) - nuclear area (#10), change in normalized cell width (#17). Cell Shape (blue) - normalized cell roundness (#11), cell eccentricity (#16). **C.** ROC curves for the trained classifier (blue line) and a random prediction (dashed black line). The area under the curves are noted in corresponding colors. **D,E,F.** Probability for cells to become infected, based on three different cellular features at time zero. D - cluster prominence (textural feature), E - cell velocity and F - cell-cycle position. **G.** Their mean classifier score in cells that will become infected (blue) or non-infected (red) over 24 hours, aligned by their cell-cycle position. The figure shows the clear cell-cycle dependency for infection outcome, as well as the cell-cycle independent component, as the two curves never cross each other. **H.** Correct classification can also be done using images of cells prior to the addition of the virus. A second, smaller dataset was constructed in which cells were first imaged for 24 hours and then infected. Shown are the classifier performances based on the raw predictor score (purple line) or after normalizing by the cell-cycle stage (yellow line).

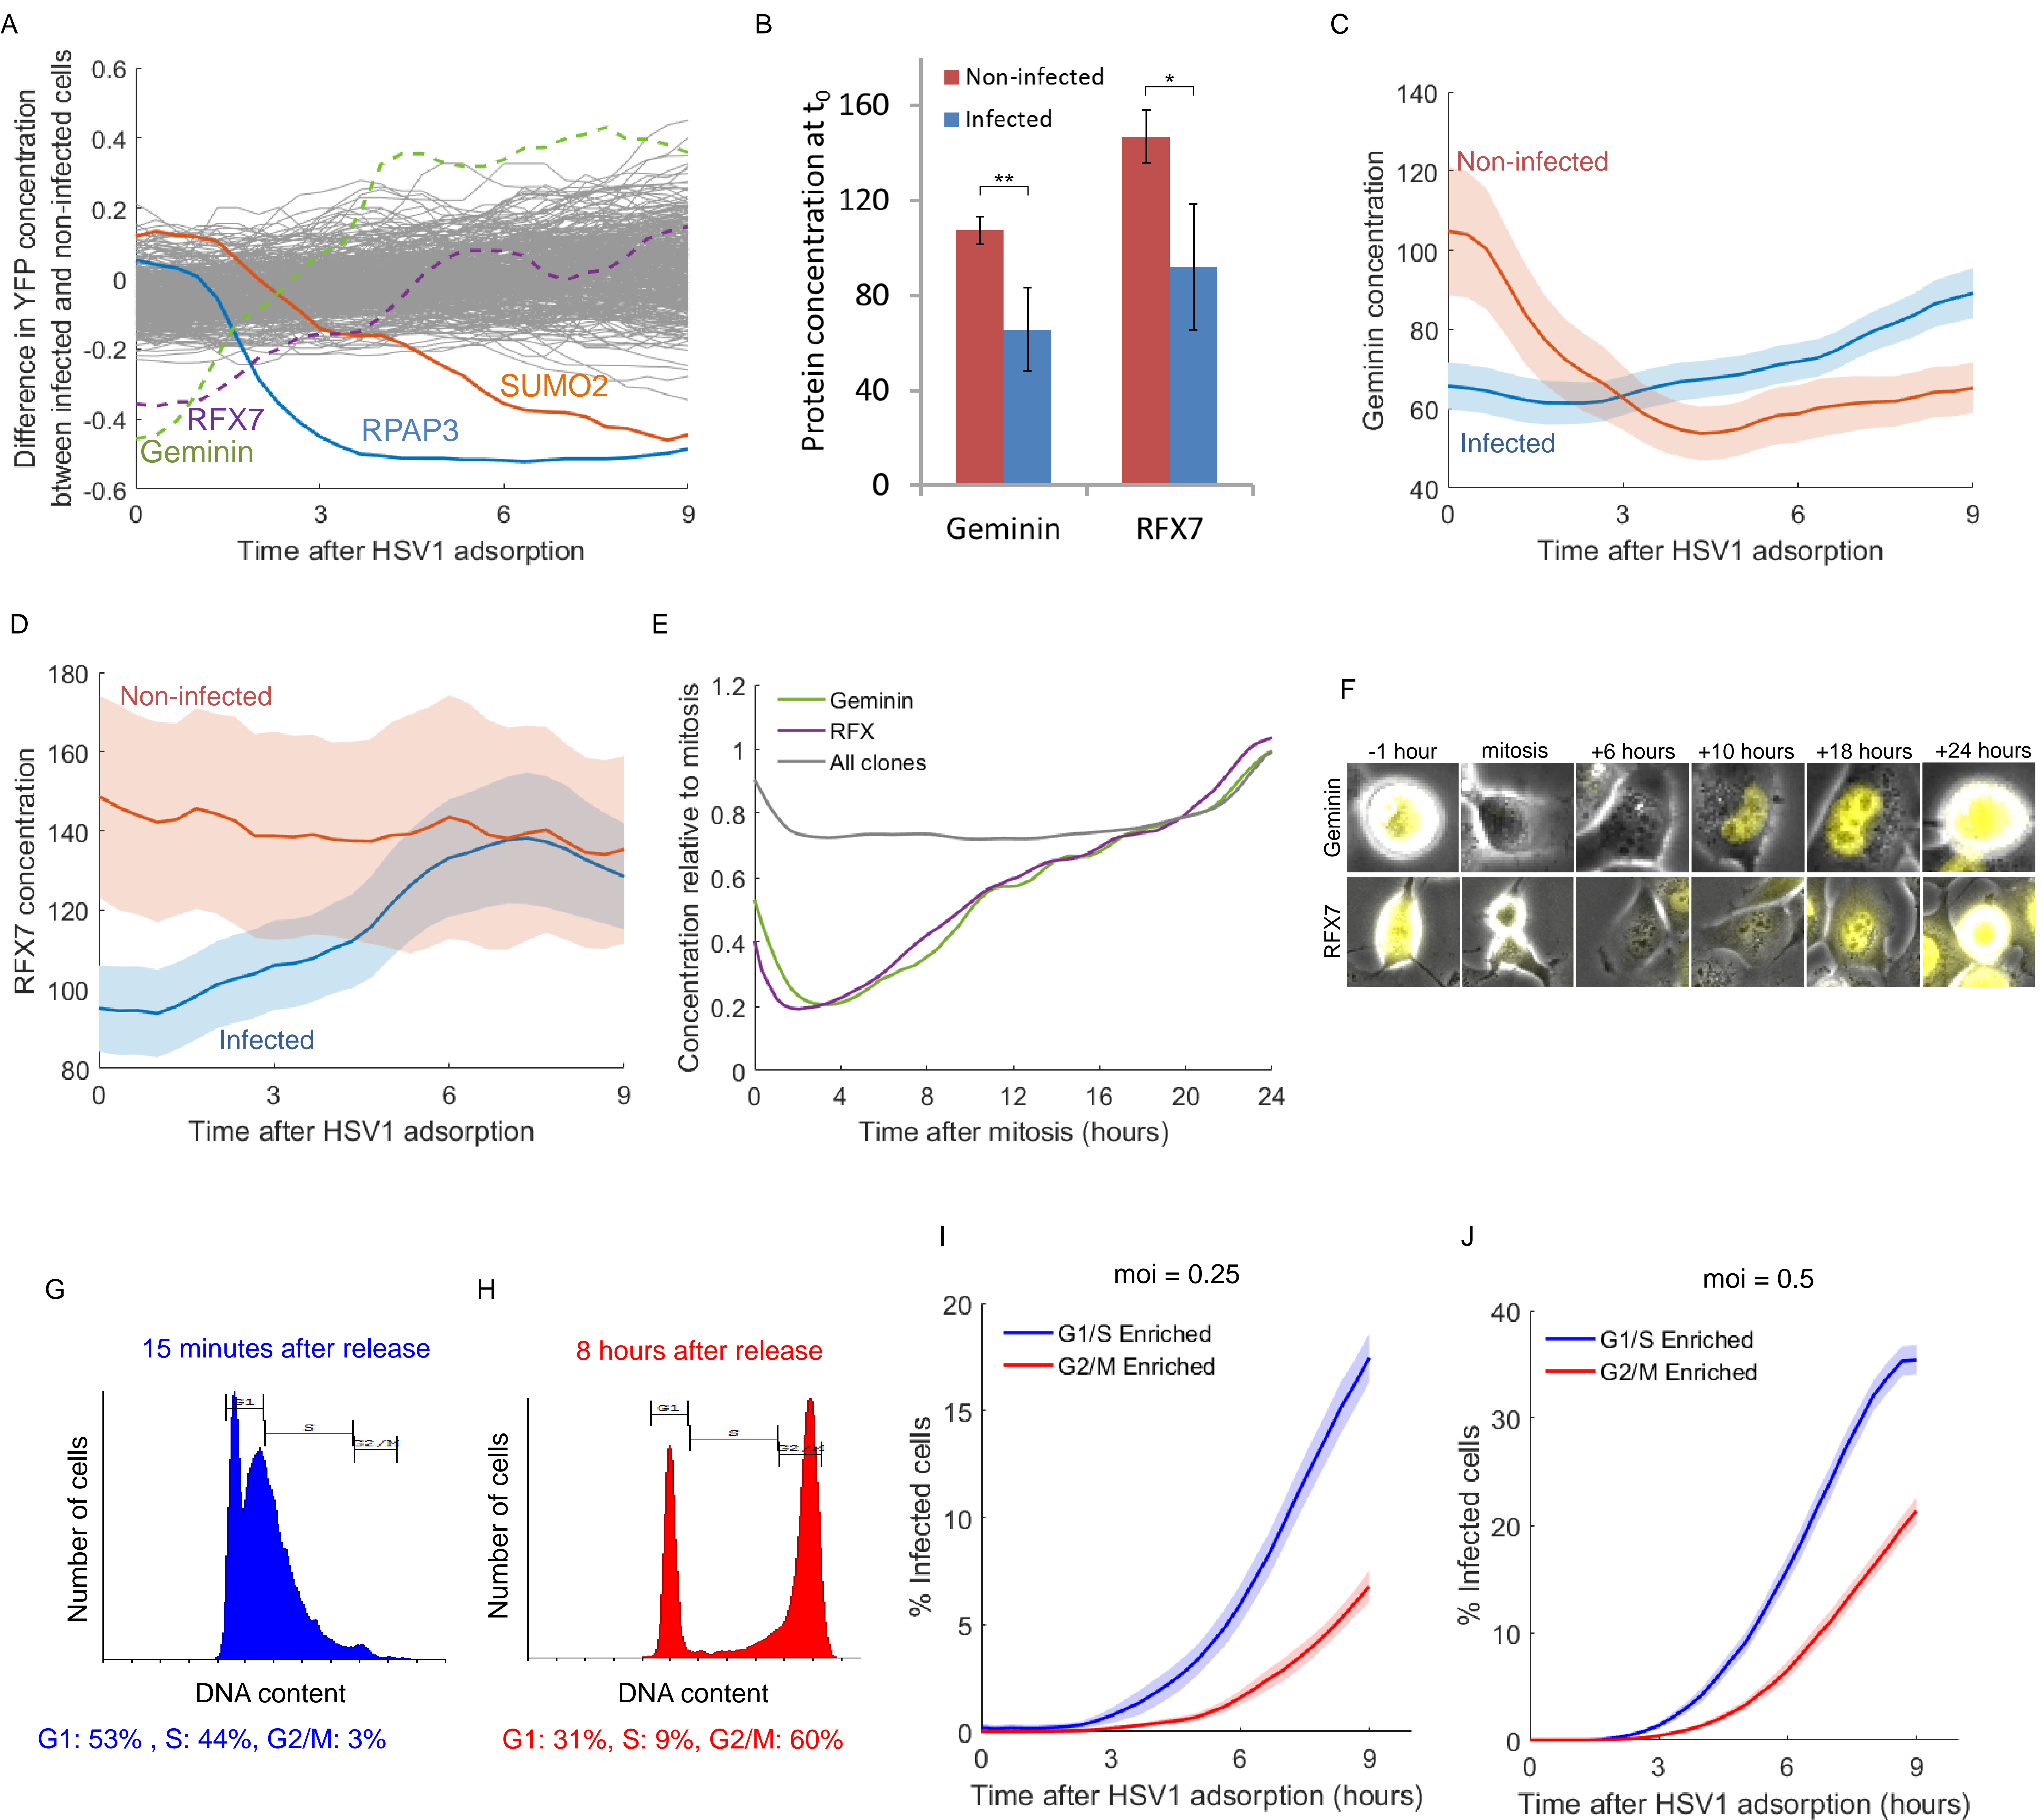

**Figure 3. Cells in the early part of the cell-cycle are more susceptible to HSV1 infection.**

**A.** The fraction difference in YFP concentration between infected and non-infected cells over the first nine hour after adsorption. The majority of the clones (grey lines) showed differences in the range of  $\pm 0.2$  (20%), which are within experimental error. Four clones are highlighted. Geminin (dashed green line) and RFX7 (dashed purple line) concentrations are lower in cells that will become infected at time zero. SUMO2 (red line) and RPAP3 (blue line) concentration decrease over time, specifically in cells that will become infected. **B.** Geminin and RFX7 concentration (mean  $\pm$  s.e.m) in cells that will become infected (blue bars) or not-infected (red bars) at time zero. \* p-value < 0.05, \*\* p-value < 0.01. Both were calculated based on a one-tailed t-test. **C, D.** Geminin (C) and RFX7 (D) concentration (mean  $\pm$  s.e.m) over time in cells that will become infected (blue lines) or not-infected (red lines). **E.** Geminin (green line) and RFX7 (purple line) concentration are cell-cycle dependent. The gray line depicts the median behavior of all other clones in the screen. **F.** Representing images of cells expressing YFP-Geminin (top row) or YFP-RFX7 (bottom row) at different times post-mitosis. **G, H.** Distribution of DNA content in cells 15 minutes (G) and 8 hours (H) after release from double-thymidine block. **I, J.** Accumulation of infected cells (CFP<sup>+</sup>) as a function of time for cells enriched for the G1 and S (blue lines) or G2/M (red lines) stages, infected with HSV1 at an moi of 0.25 (I) or 0.5 (J). mean  $\pm$  s.e.m from six positions for each moi.

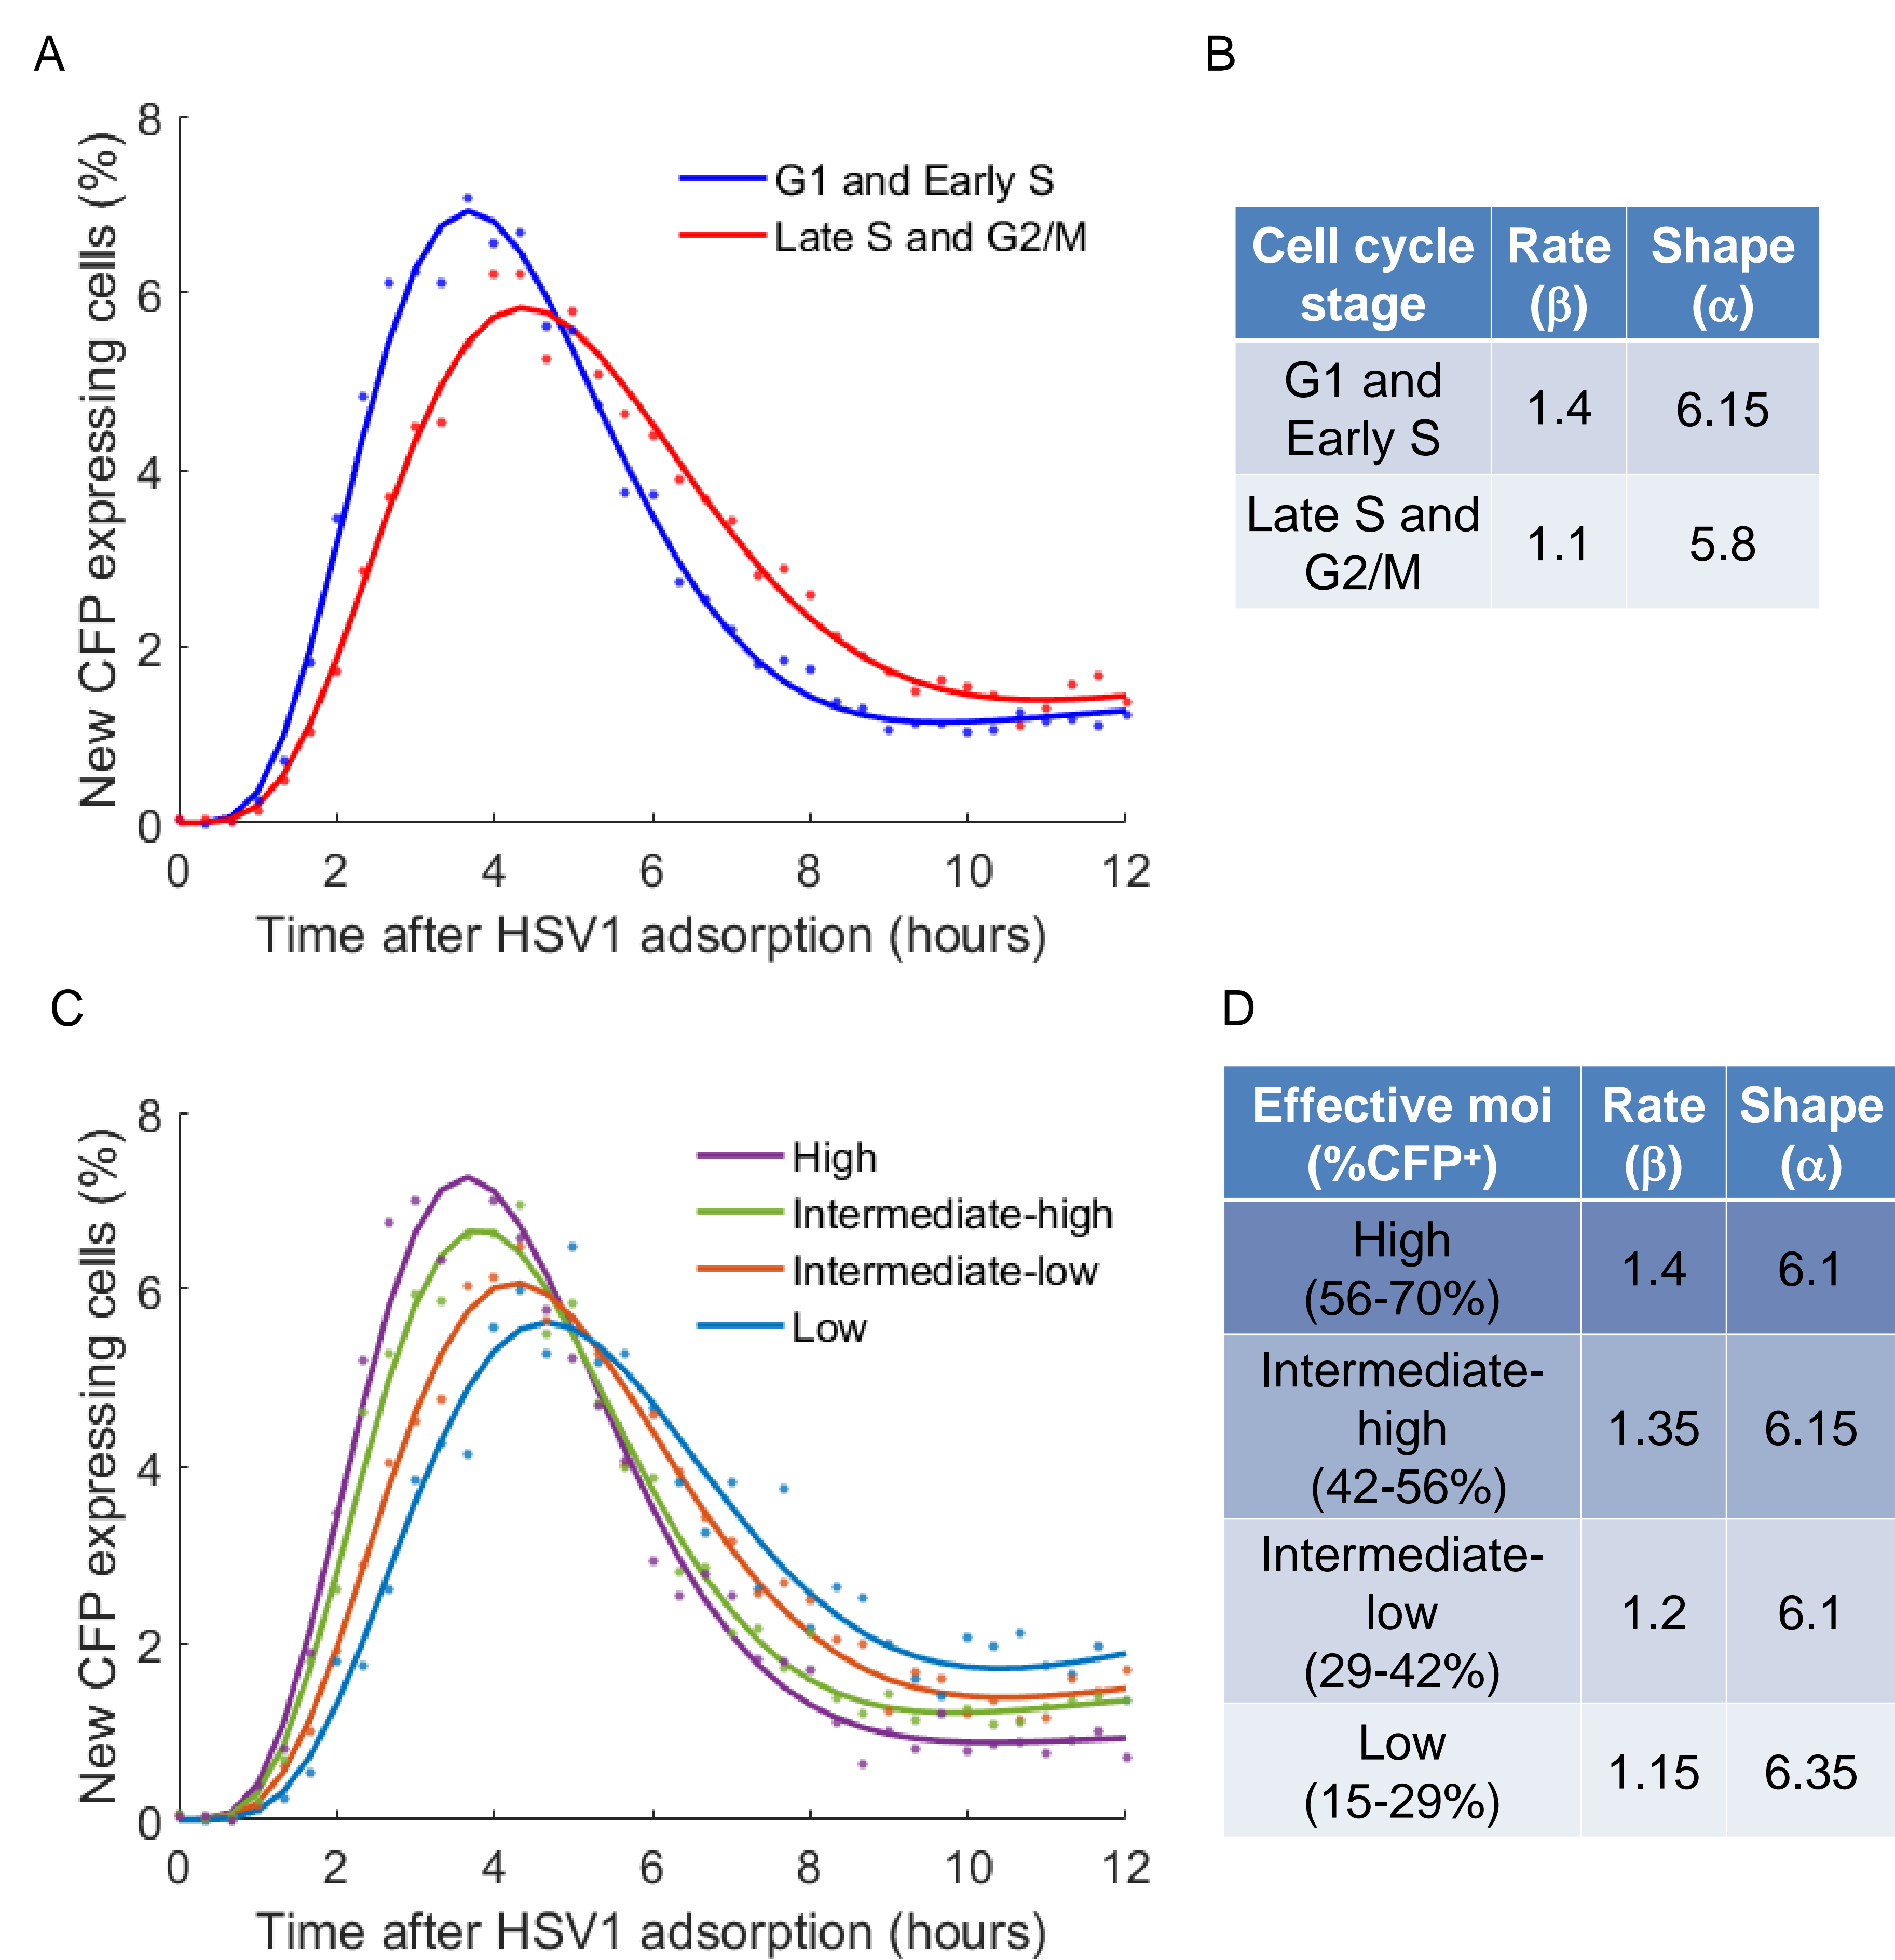

**Figure 4. The cell-cycle stage of the host cell impact HSV1 kinetics.**

**A.** Data points (circles) and models (lines) fitted to cells infected at the early part of the cell-cycle (G1 and early S) or the late part of the cell-cycle (late S and G2/M). Cells in the G1 and early S stages show a faster kinetics with shorter lag times. **B.** Best estimated parameters for the Gamma distributions of primary infection kinetics shown in A. Cells at the later stages of the cell-cycle (Late S and G2/M) showed a 21% decrease in the rate parameter  $\beta$ . The shape parameter  $\alpha$  was largely unaffected, showing a 6% difference. **C.** Data points (circles) and models (lines) fitted to cells binned by their effective moi. Infection kinetics is faster as the effective moi increases. **D.** Best estimated parameters for the Gamma distributions of primary infection kinetics shown in C. The rate parameter  $\beta$  increases as the effective moi increases, while the shape parameter  $\alpha$  remains largely unaffected, with a slight increase (4%) at the lowest moi.

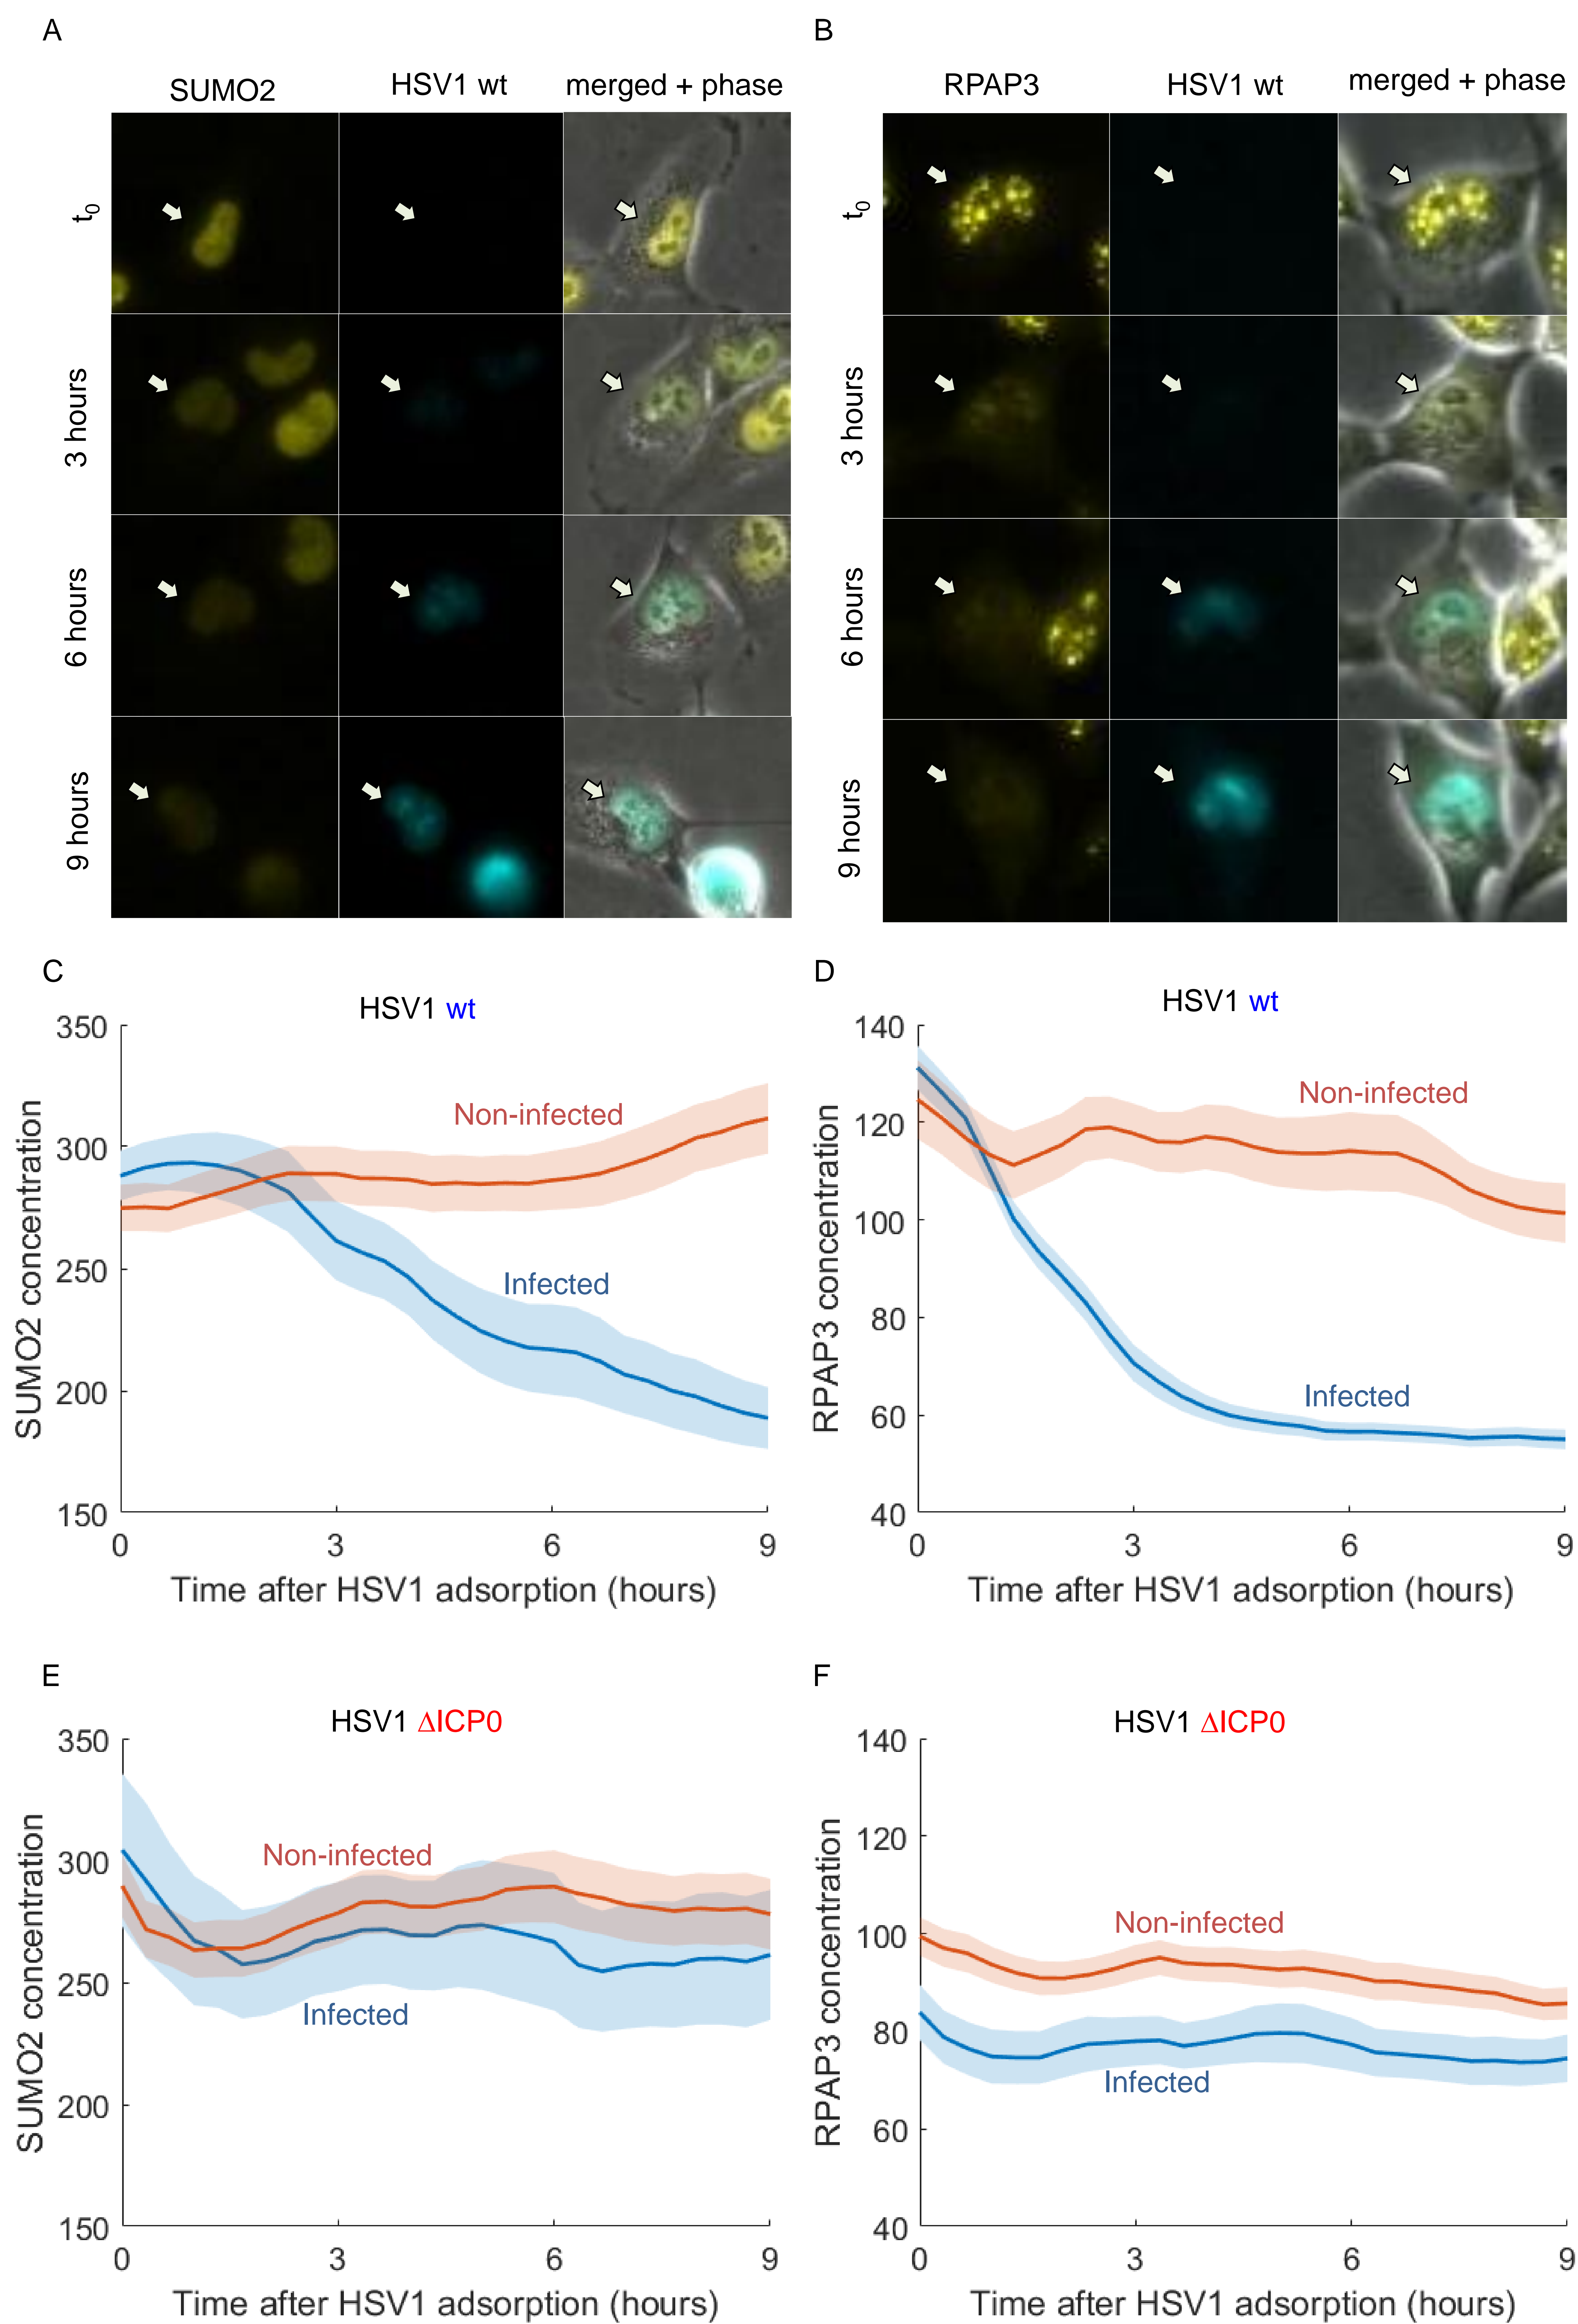

**Figure 5. SUMO2 and RPAP3 degradation upon HSV1 infection is facilitated by ICP0.**

**A,B.** Images of representing cells from time-lapse movies of SUMO2 (A) and RPAP3 (B). Shown are the YFP channel, CFP channel and a merged image including the phase channel at 0-9 hours post wild-type HSV1 adsorption. **C,D.** mean $\pm$ s.e.m of SUMO2 (C) and RPAP3 (D) concentrations in non-infected (red) and infected (blue) cells following wild-type HSV1 adsorption. **E,F.** mean $\pm$ s.e.m of SUMO2 (E) and RPAP3 (F) concentrations in non-infected (red) and infected (blue) cells following infection by a mutant HSV1 that does not express ICP0.



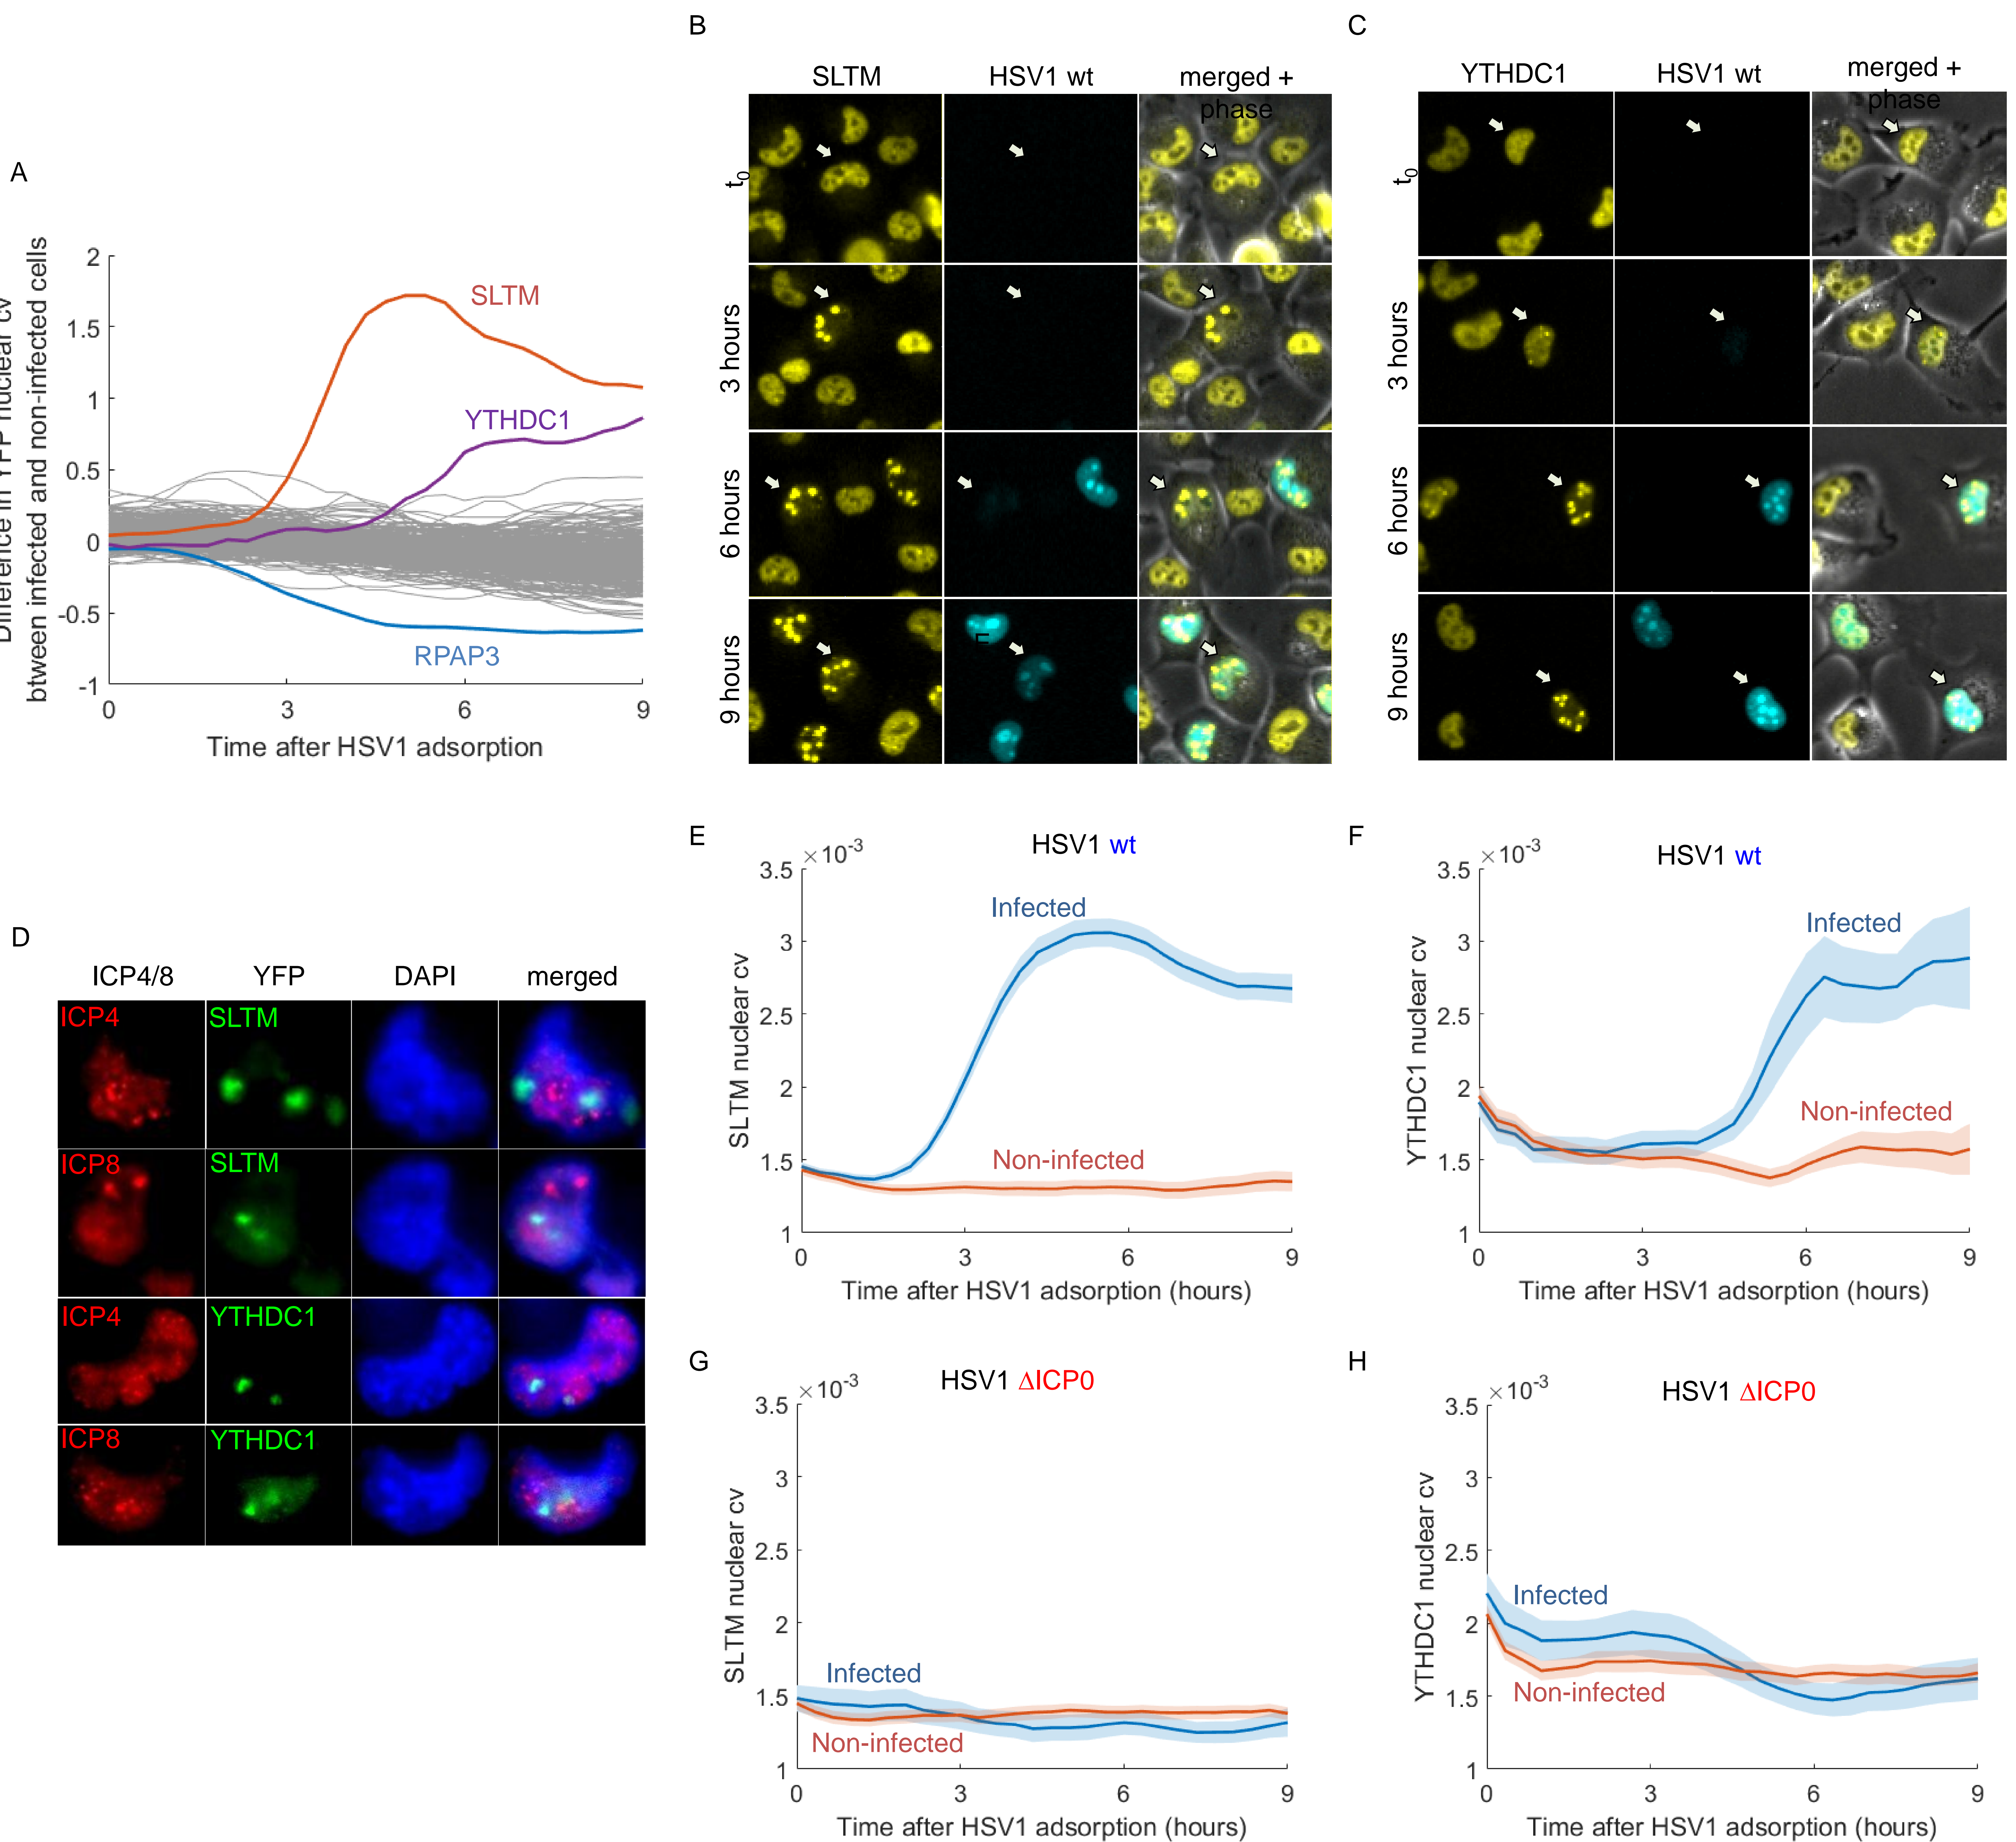

**Figure 6. SLTM and YTHDC1 localization change upon HSV1 infection is facilitated by ICP0.**

**A.** The fraction difference in YFP nuclear cv between infected and non-infected cells over the first nine hour after adsorption. The majority of the clones (grey lines) did not show significant changes. Three clones are highlighted; SLTM (red line) and YTHDC1 (purple line) which show an increase in nuclear cv and RPAP3 (blue line) which shows a decrease in nuclear cv. **B,C.** Images of representing cells from time-lapse movies of SLTM (B) and YTHDC1 (D). Shown are the YFP channel, CFP channel and a merged image including the phase channel at 0-9 hours post wild-type HSV1 adsorption. **D.** Cells infected by wild-type HSV1 were fixed and stained for ICP4 or ICP8 at six hours post adsorption and imaged using a X100 magnification lens. Shown are representative images of nuclear foci formed by SLTM (top two rows) or YTHDC1 (bottom two rows), which do not co-localize with ICP4 or ICP8. Cellular DNA was stained with DAPI (blue). **E,F.** SLTM (E) and YTHDC1 (F) nuclear cv (mean  $\pm$  s.e.m) in non-infected (red) and infected (blue) cells following wild-type HSV1 adsorption. **G,H.** nuclear cv (mean  $\pm$  s.e.m) of SLTM (G) and YTHDC1 (H) in non-infected (red) and infected (blue) cells following infection by a mutant HSV1 that does not express ICP0.

Live cells

Fixed and stained

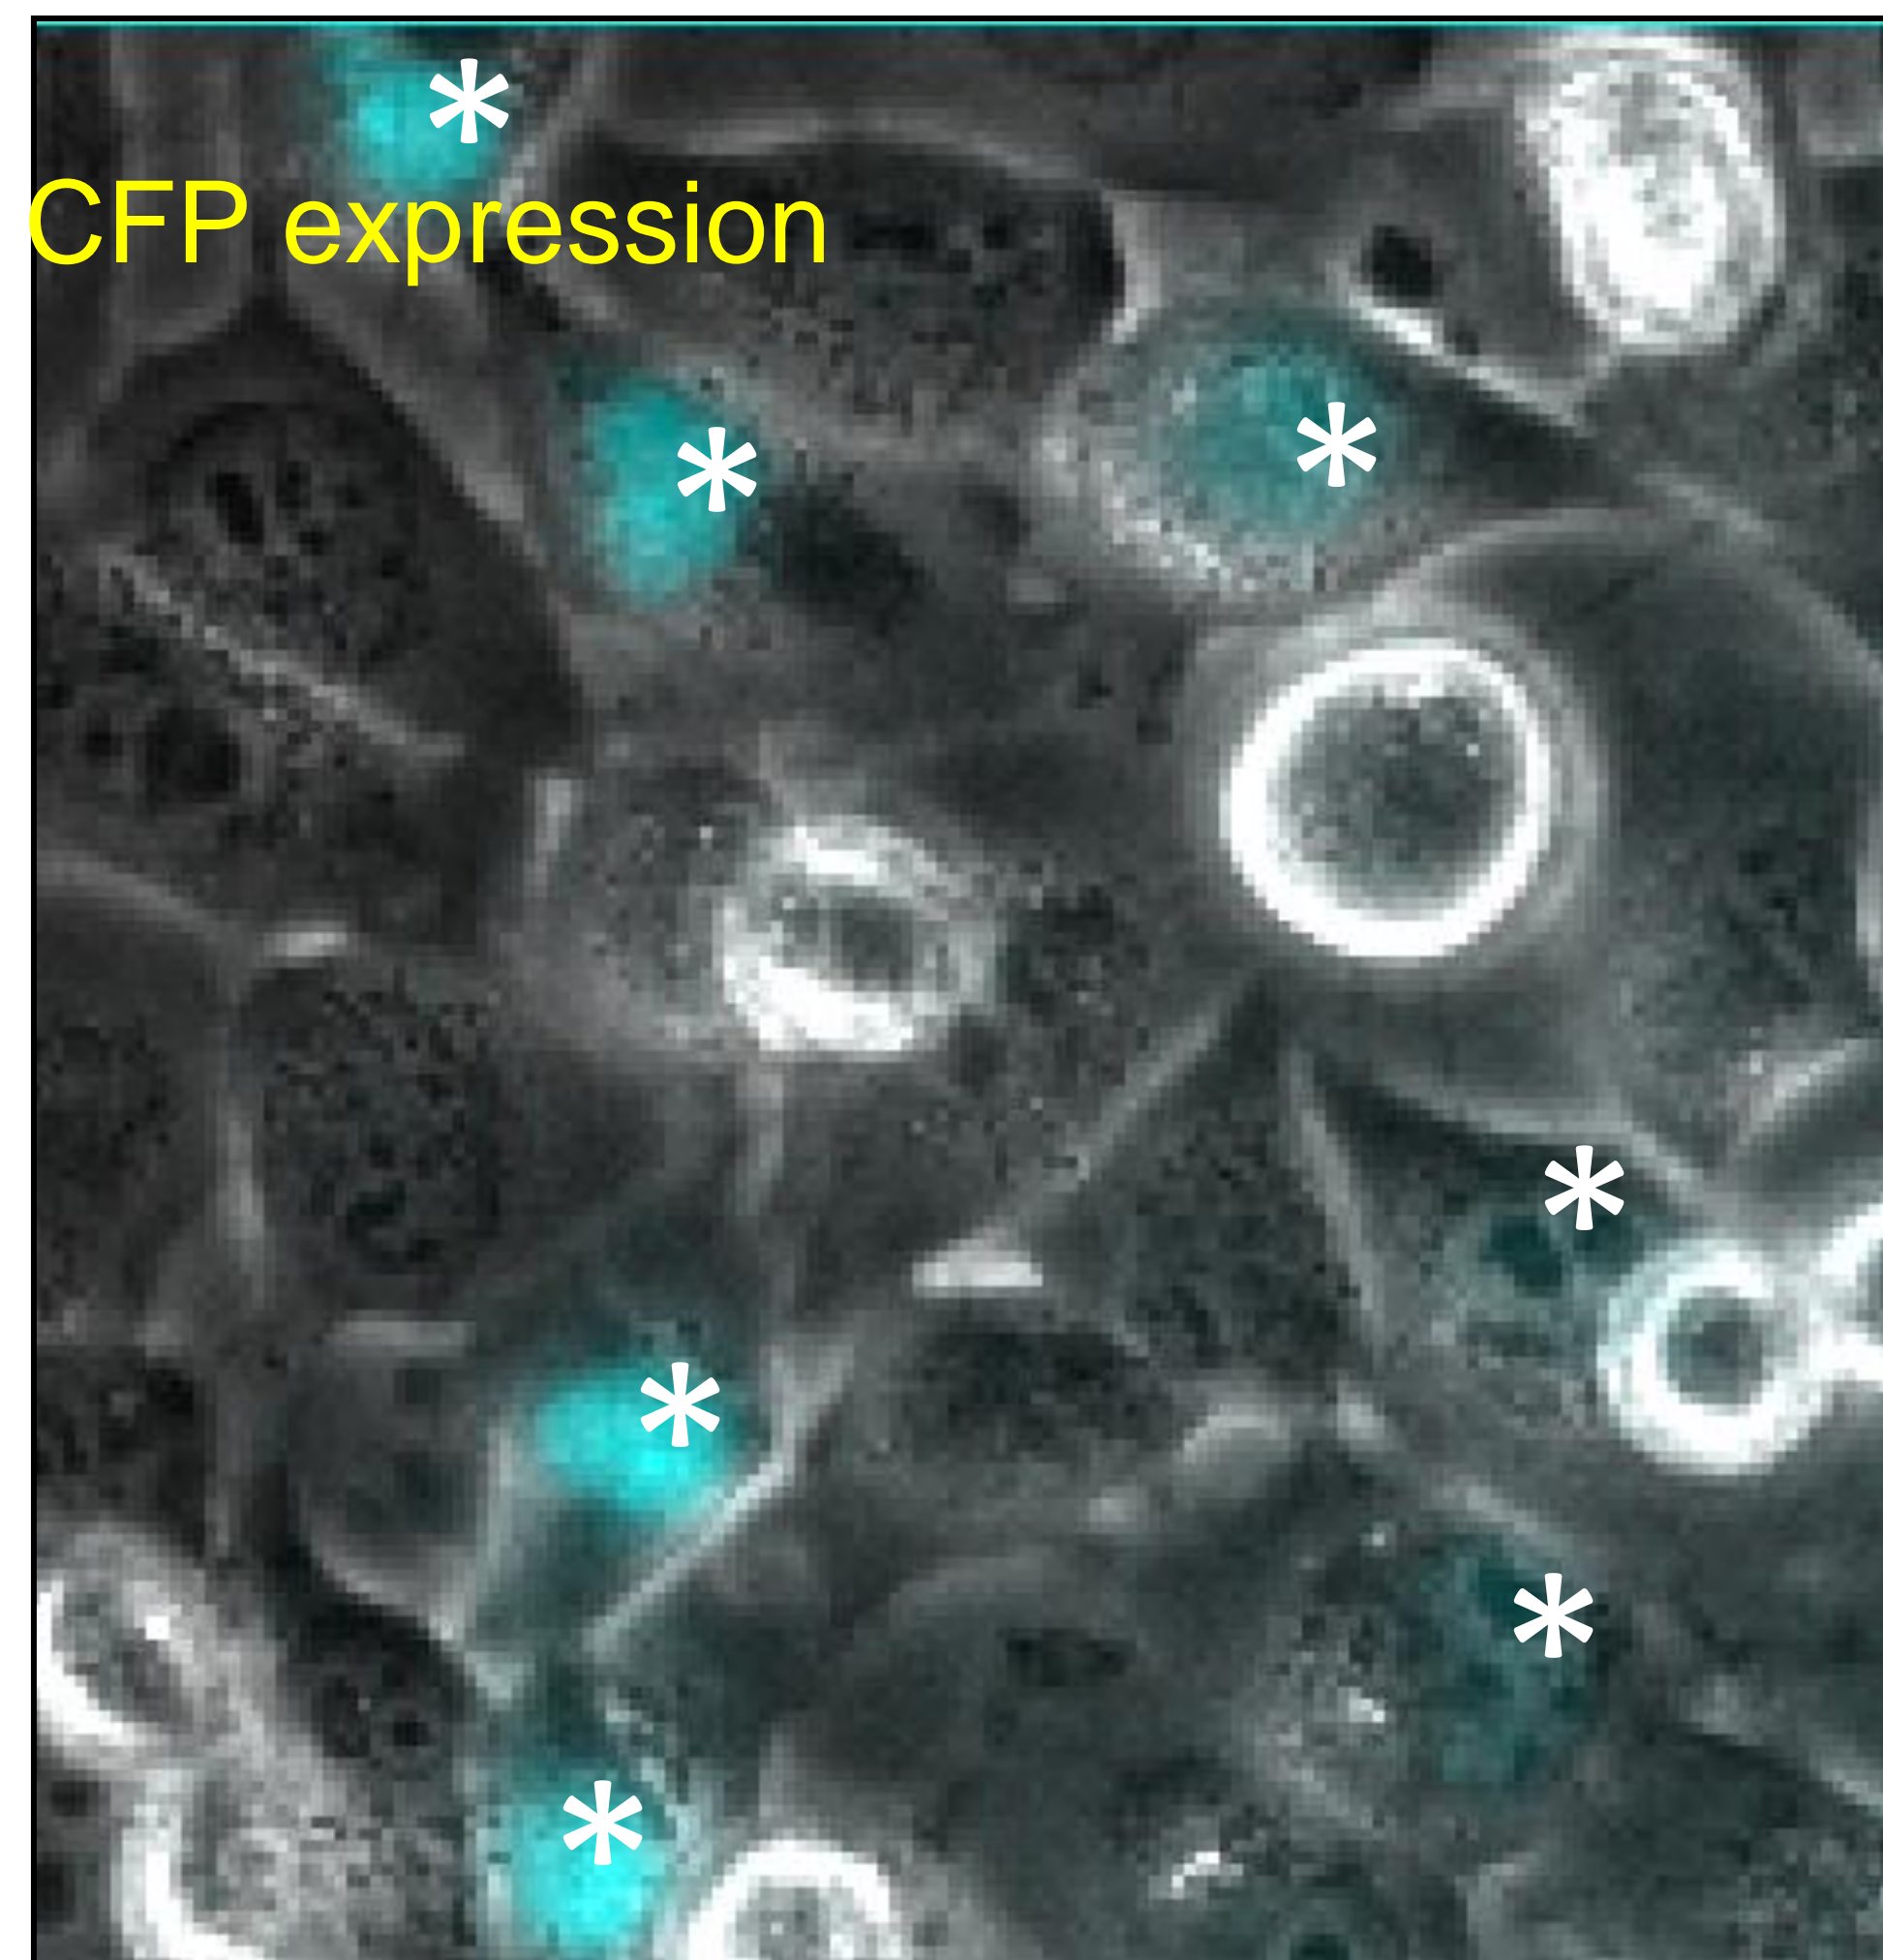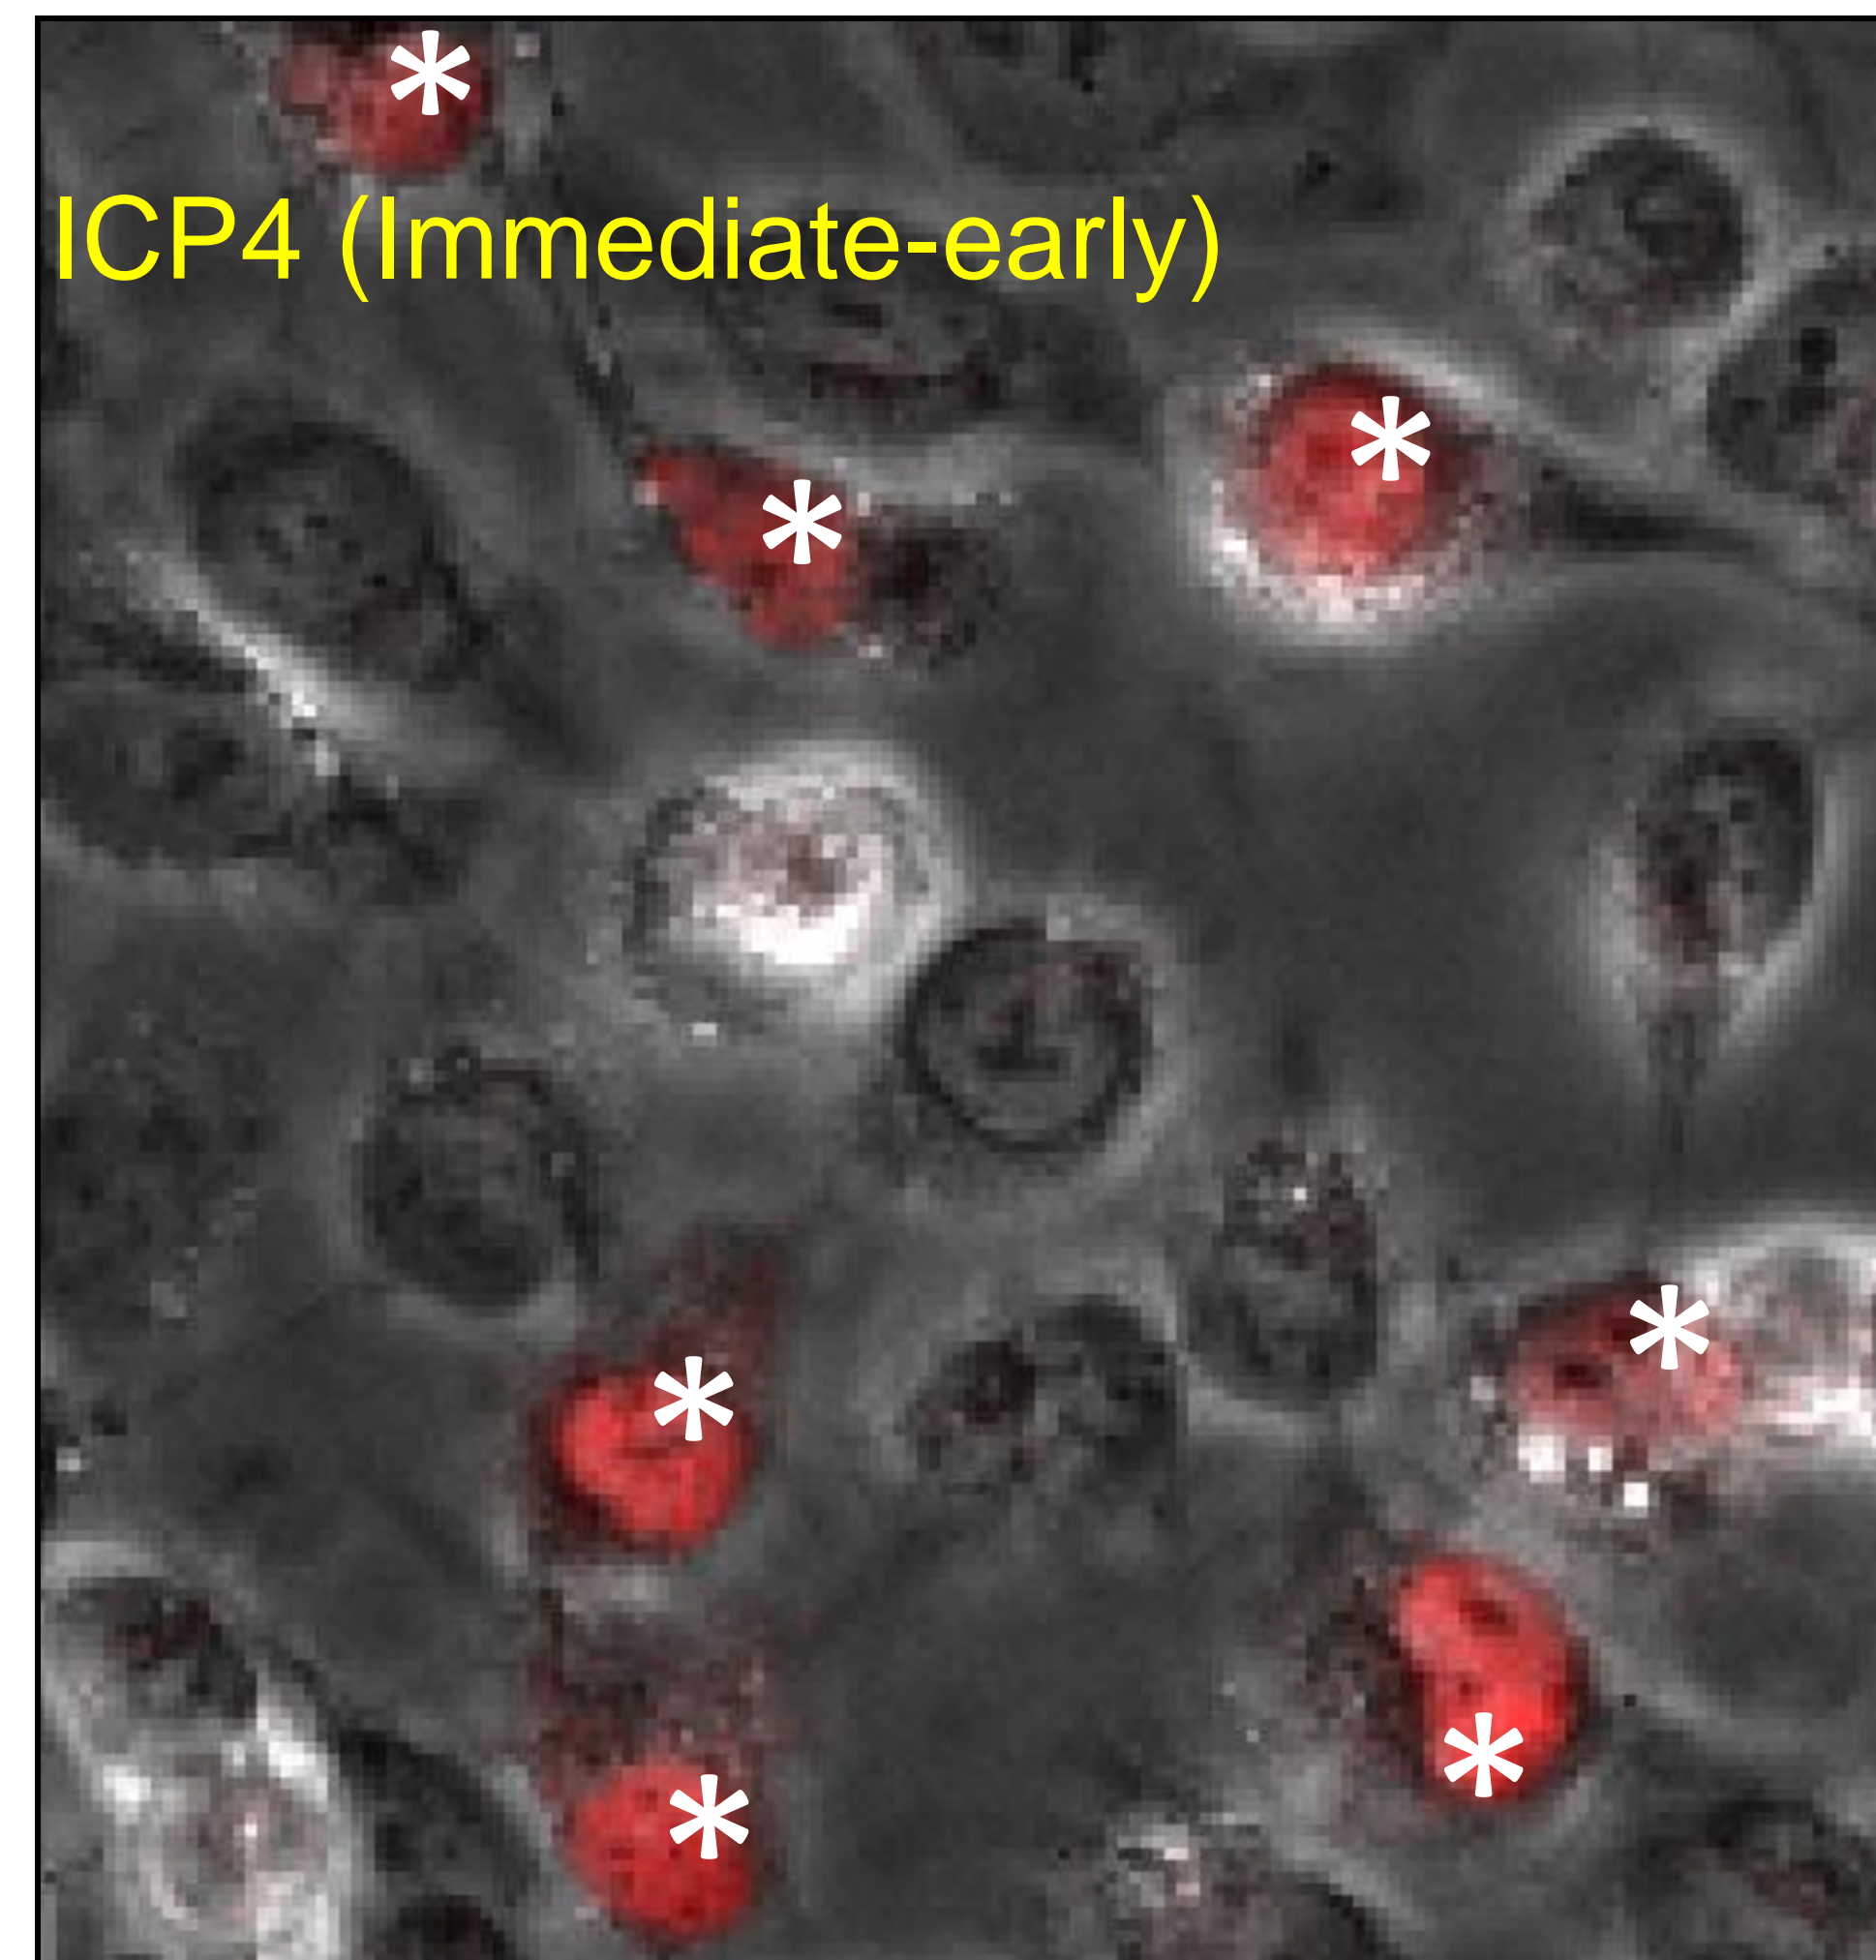

**Supplementary Figure 1 – CFP expression correlates with HSV1 immediate-early protein expression.**

Cells infected with HSV1 expressing CFP were imaged at 7 hours post adsorption, fixed and stained with antibodies against different viral proteins. All the CFP positive cells are also positive for ICP4, an immediate-early protein that is synthesized before viral DNA replication. Asterisks mark CFP positive cells and the corresponding cells after fixing and staining.

A

Infections at time T    **Primary infections**    **Secondary infections**

$$I(T) = I_p(T) + I_s(T)$$

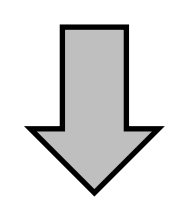

$$I(T) = I_p(T) + \delta \cdot \int_{t=0}^T \int_{\tau=0}^t I_p(\tau) d\tau \cdot I_p(T-t) dt$$

Primary infections    Scaling factor    Secondary infections

B

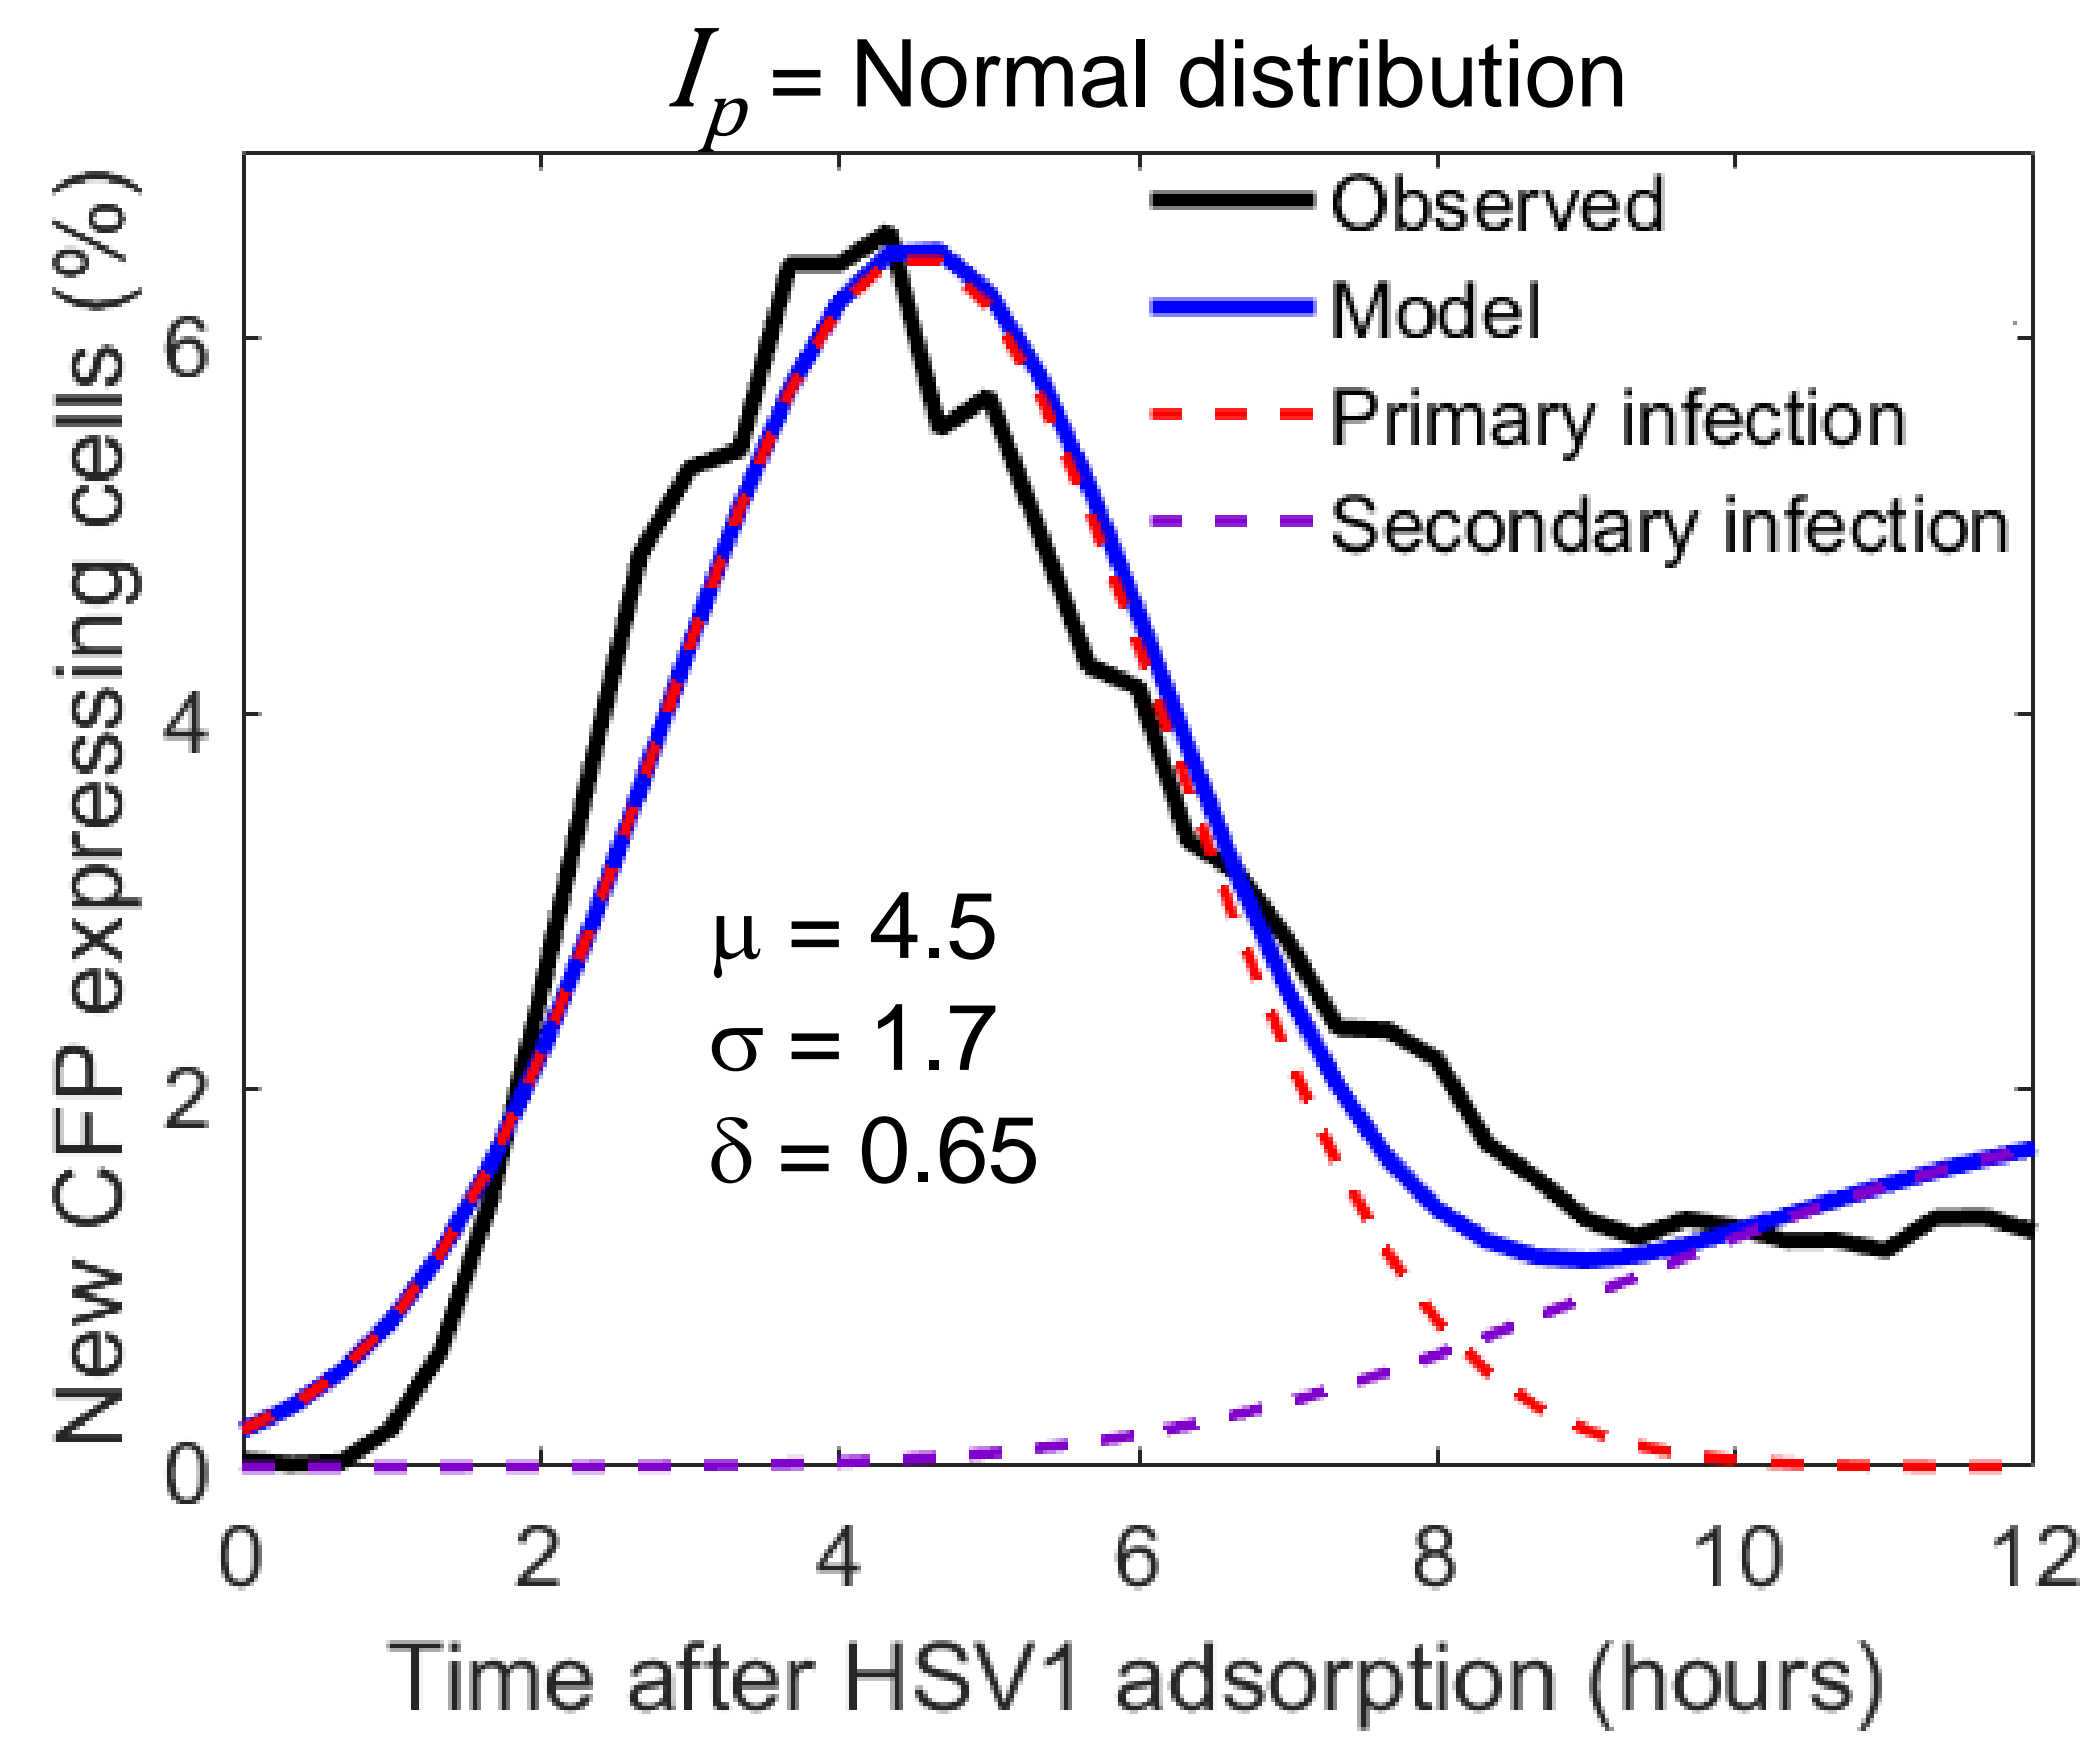

C

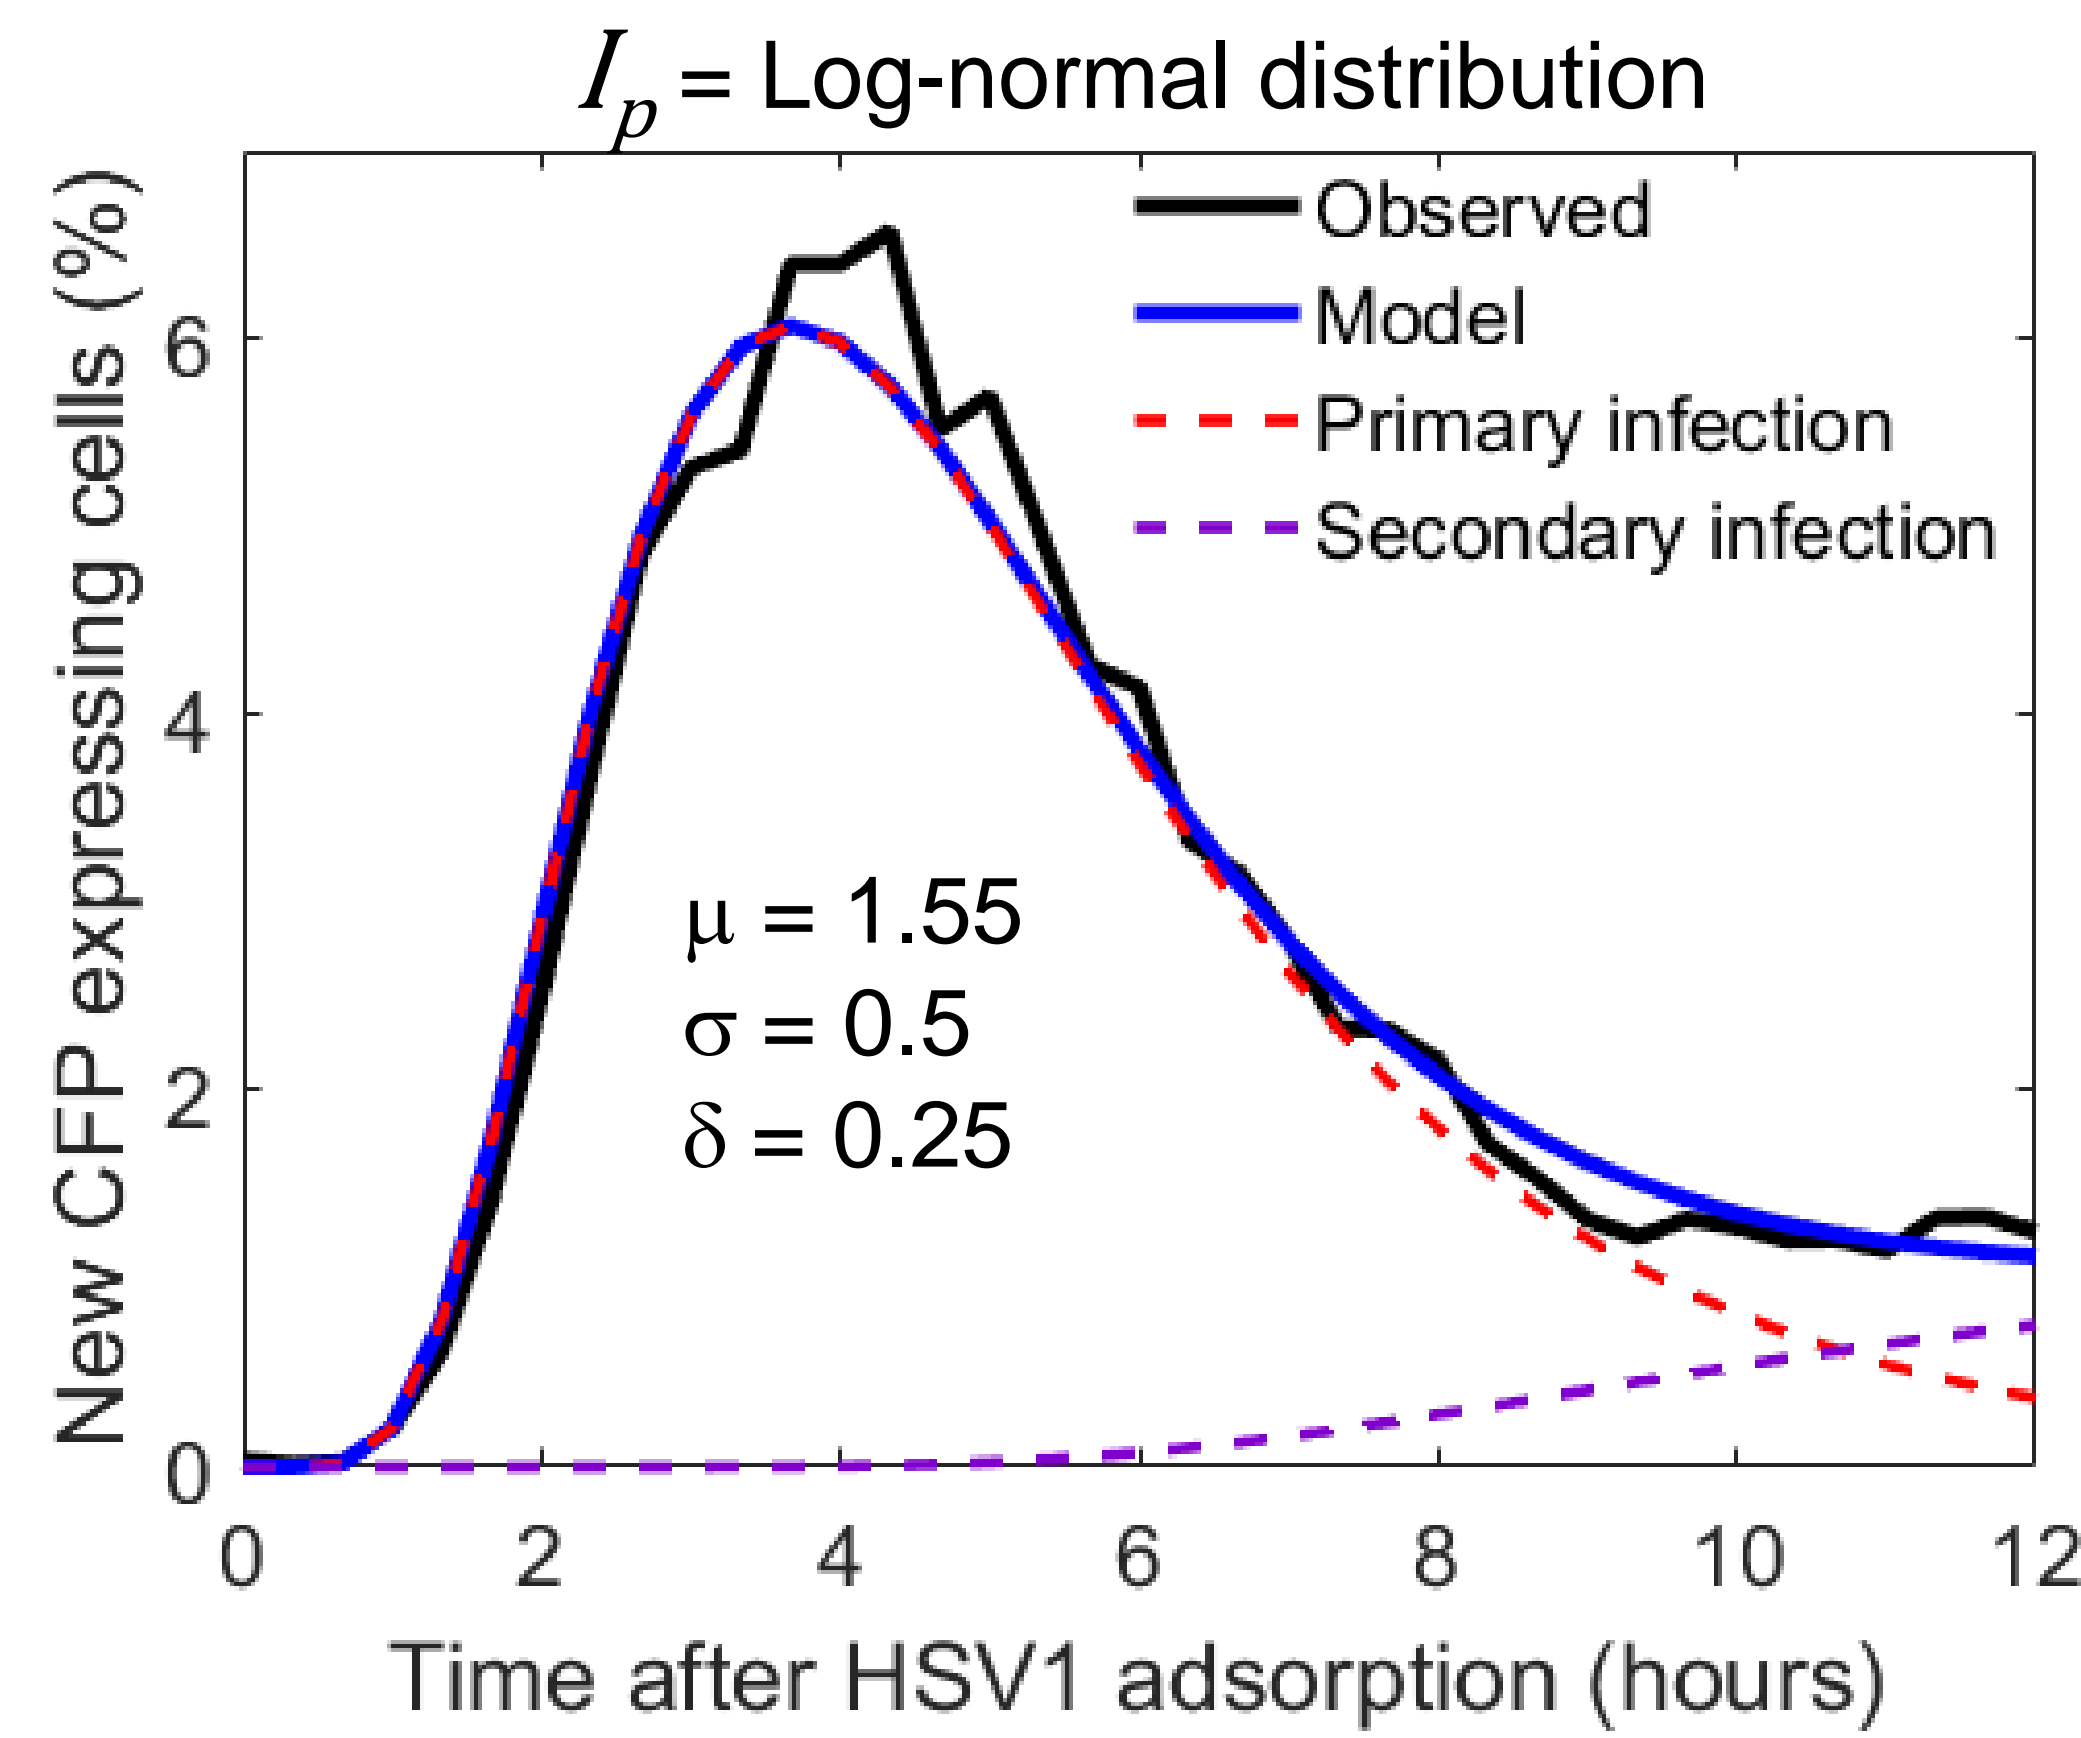

D

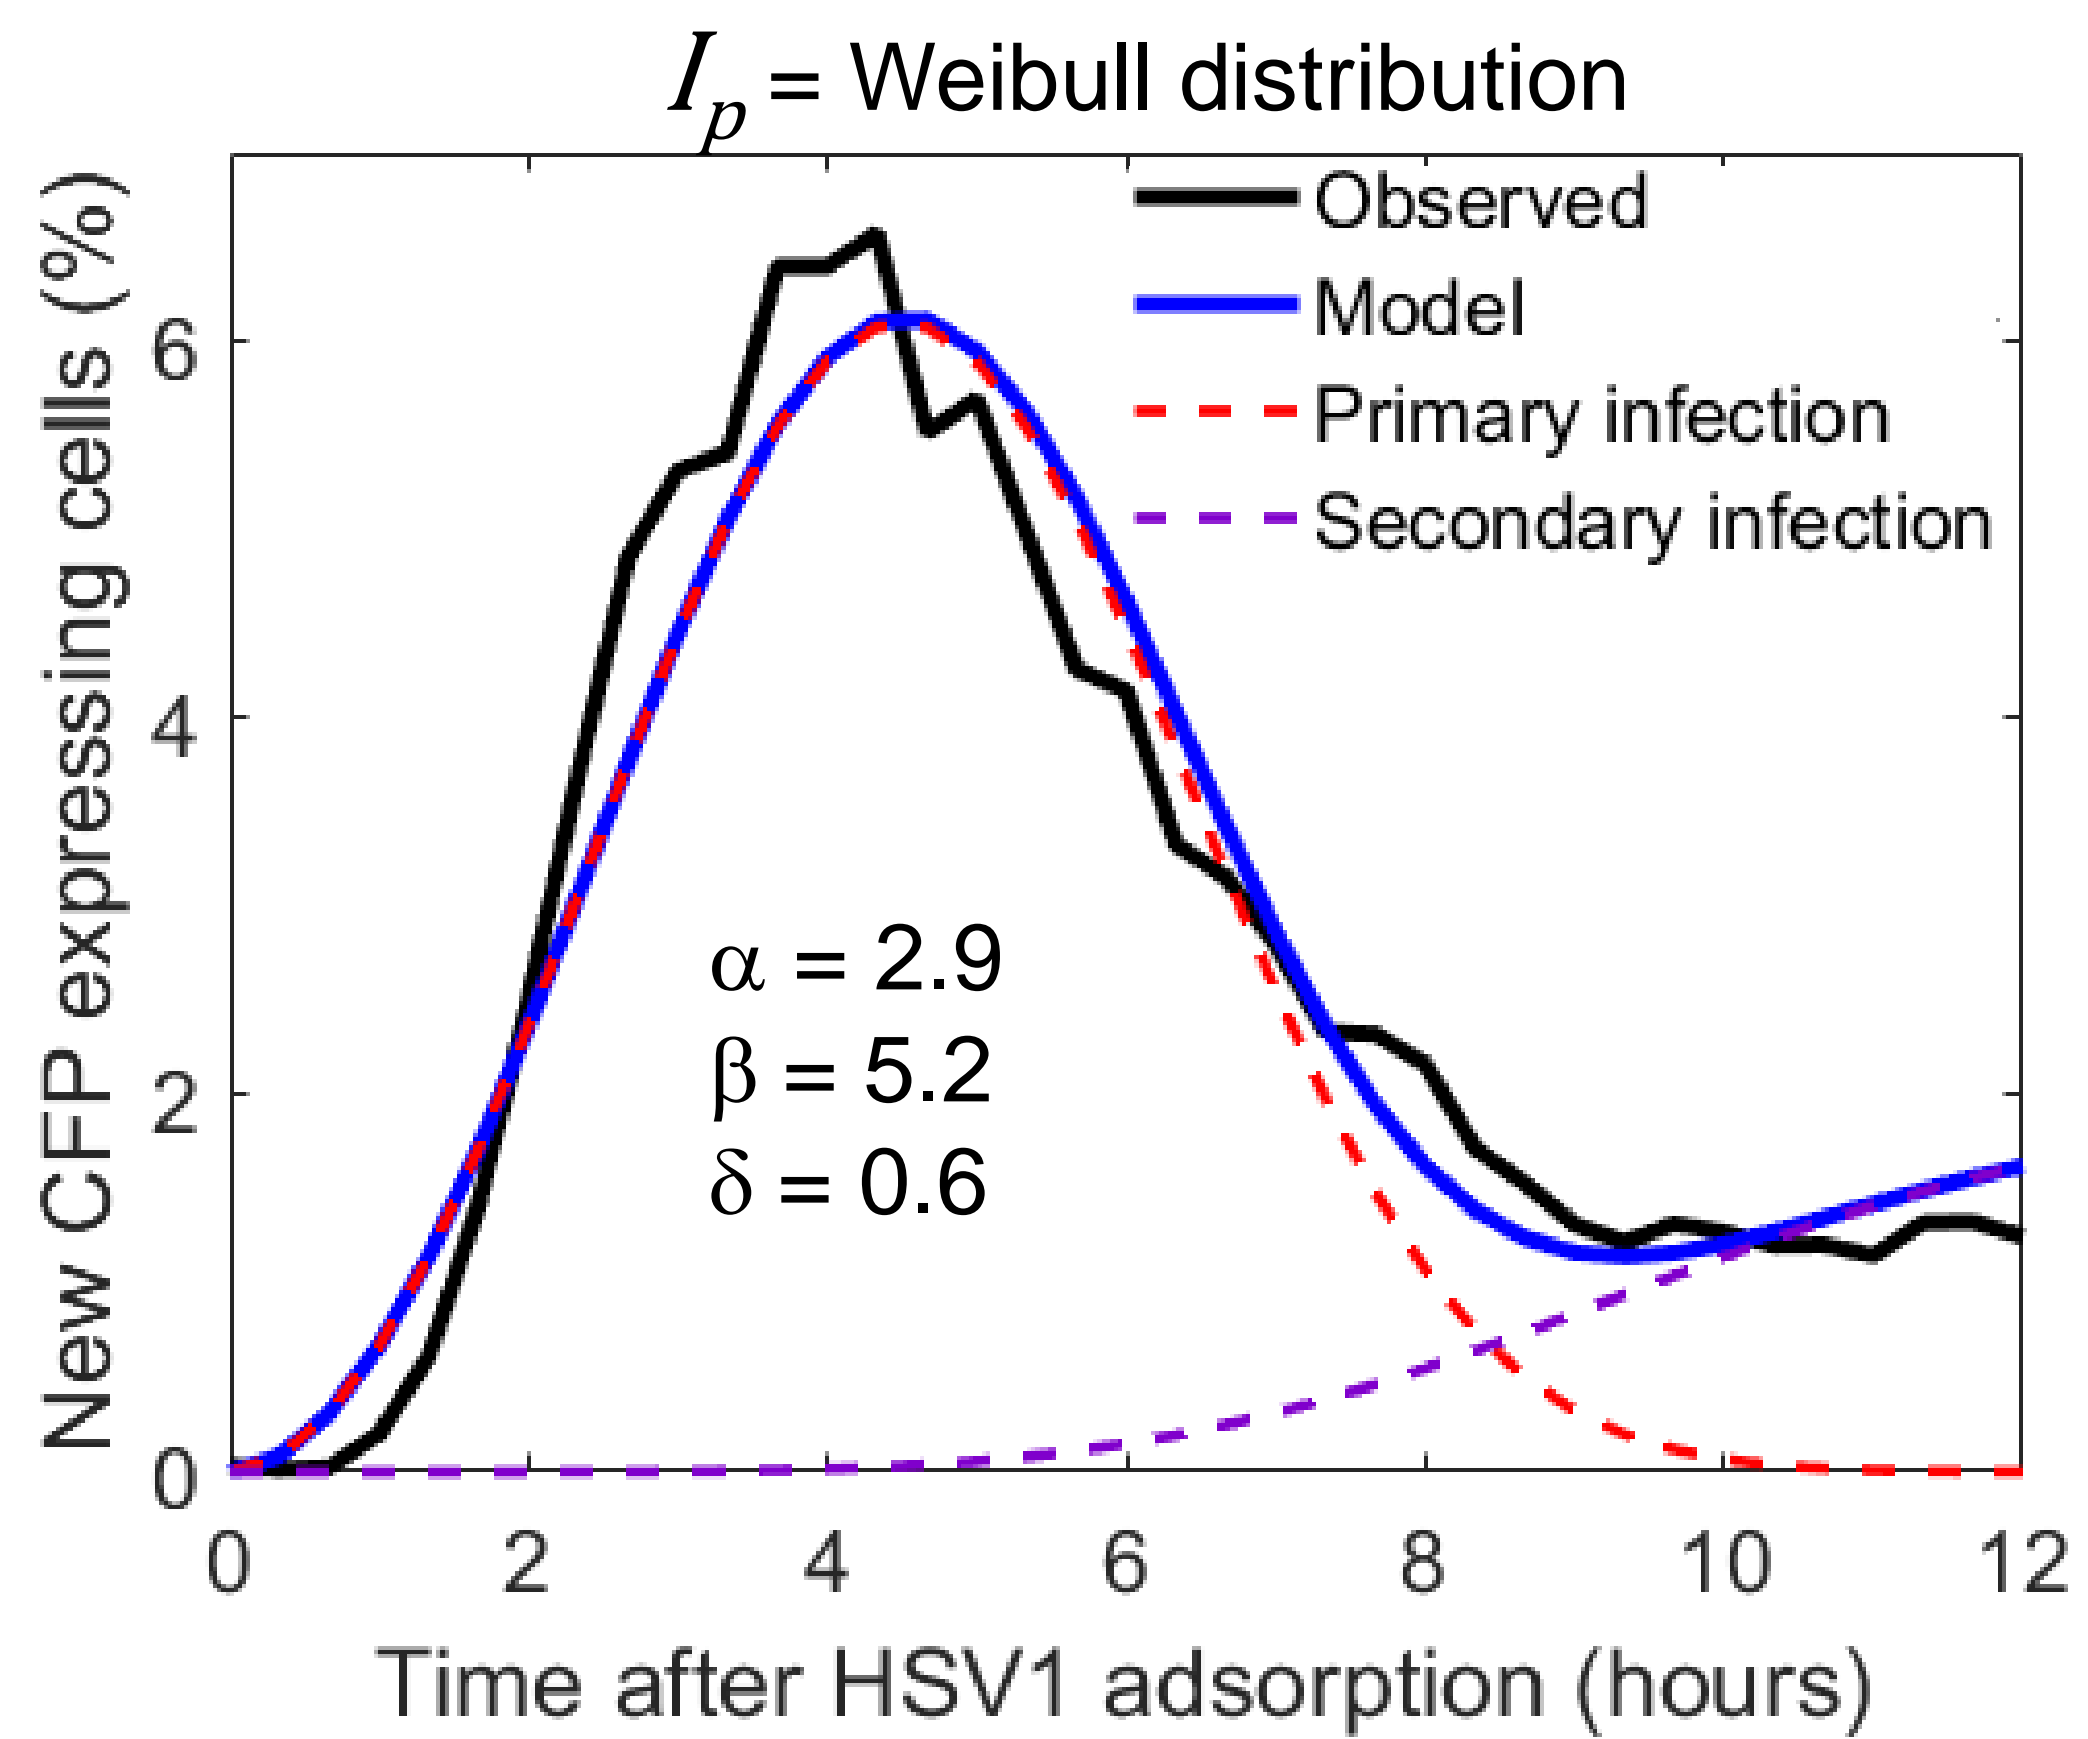

E

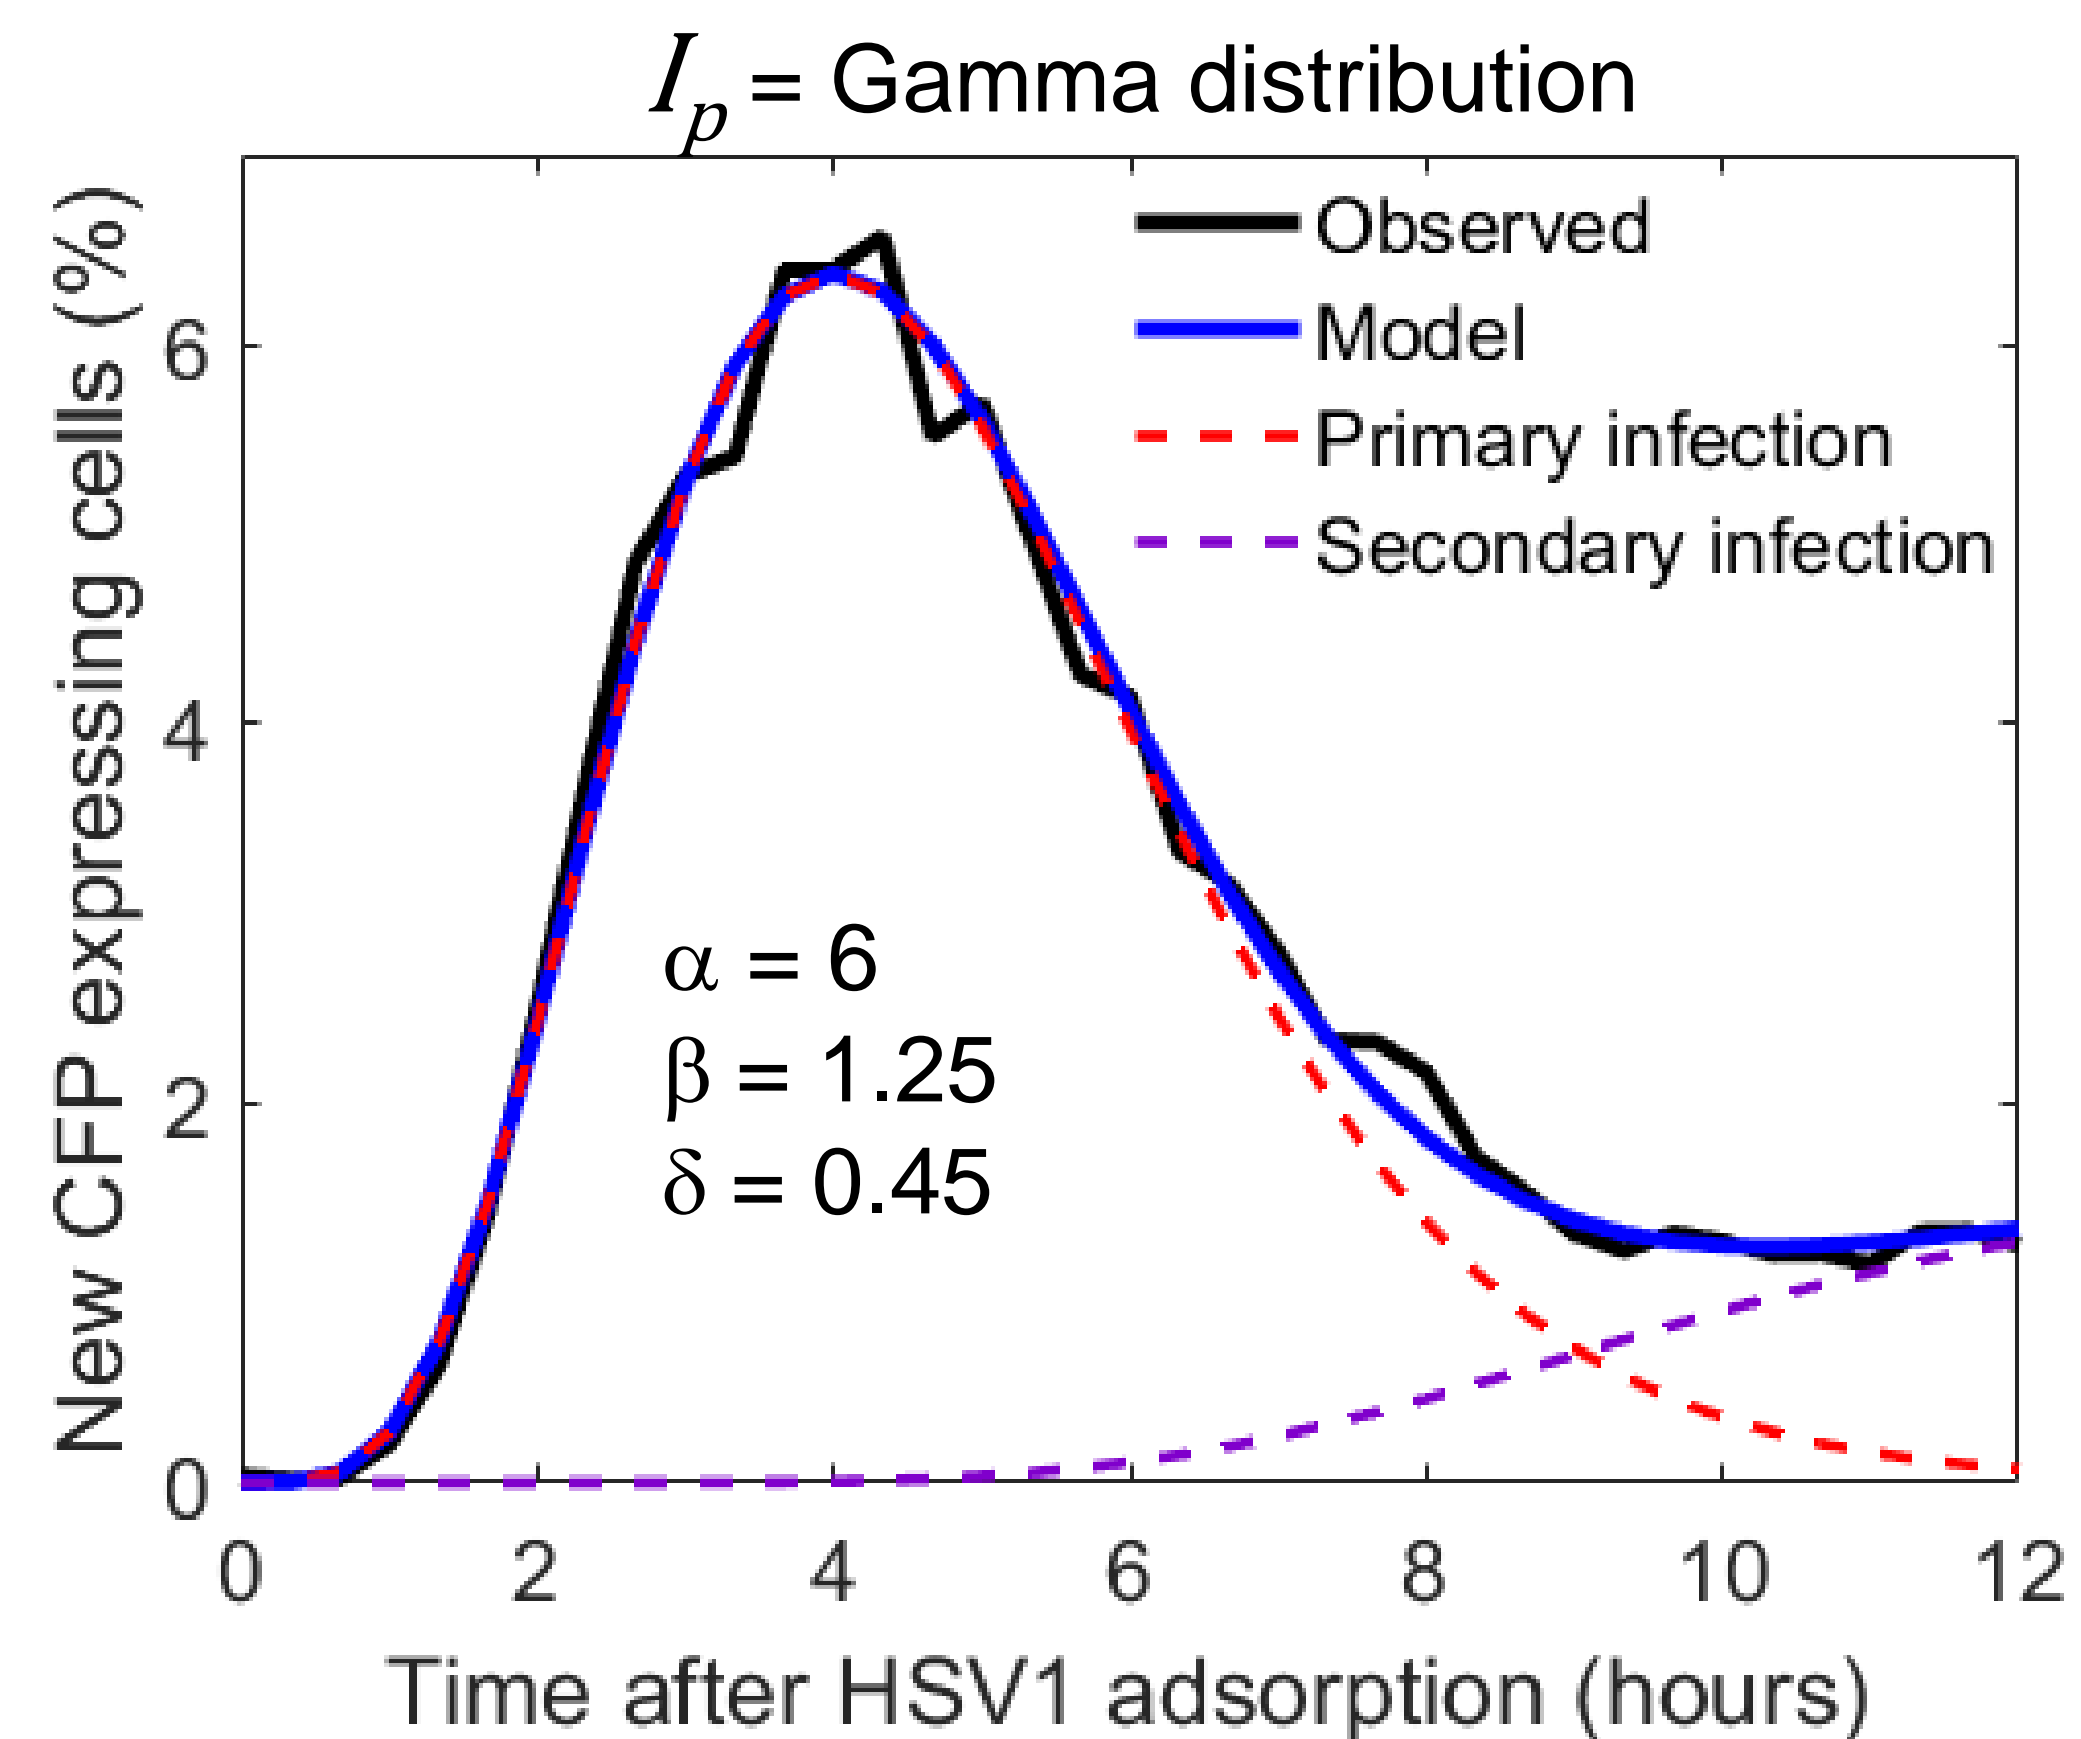

### Supplementary Figure 2 – kinetics of primary infection are best described by a Gamma distribution.

**A.** Modeling infection kinetics as the sum of primary and secondary infections (top row). We assume that the secondary infections have the same delay kinetics as primary infections, and thus can be rewritten as a function of the primary infection distribution,  $I_p$  (bottom row). **B,C,D,E.** We estimated the fit for  $I_p$  using four distribution types – Normal (B), Log-normal (C), Weibull (D) and Gamma (E). These four distribution types are defined by two parameters. The best fitting parameters are presented in the figures. In addition we also fitted the scaling factor  $\delta$ . Of these four distribution, Gamma gave the best fit the observed data (black lines). The blue lines show the model with best parameters, which can be further divided into primary (dashed red lines) and secondary (dashed purple lines) infections.

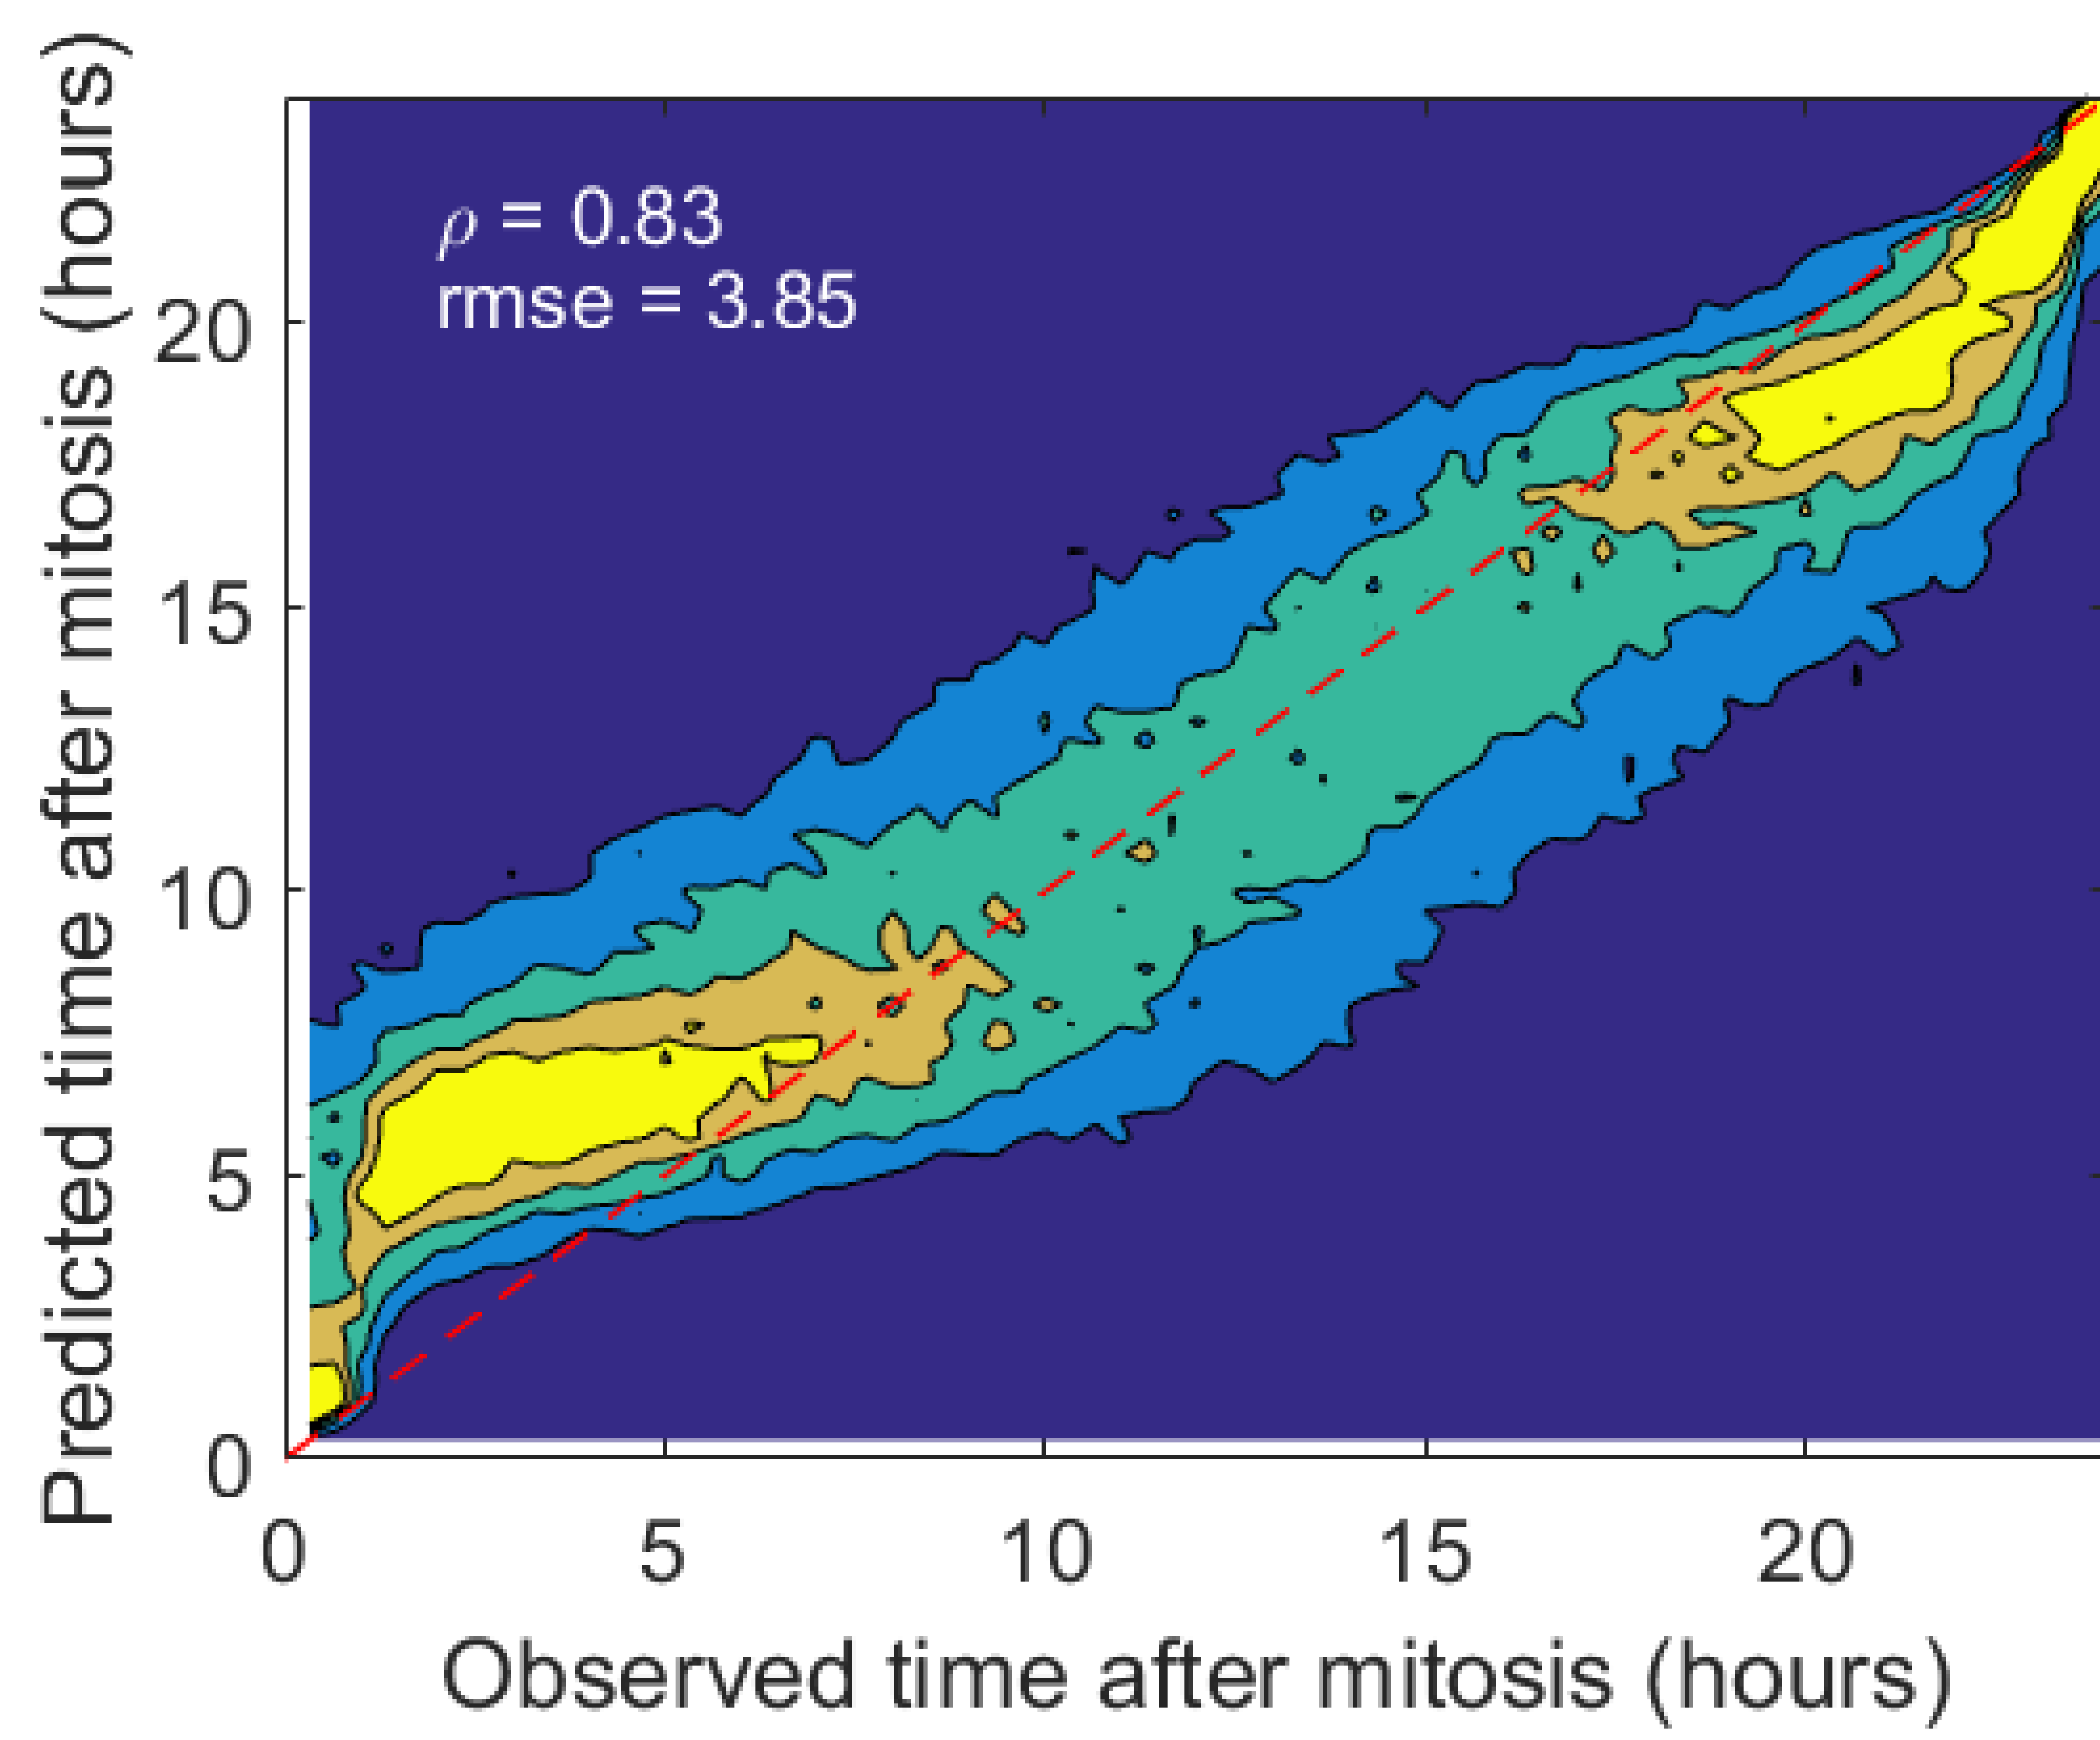

**Supplementary Figure 3 – Cell cycle prediction from still images and cell-cycle effect on HSV1 infection outcome.**

To assess the cell-cycle stage of the cells at the time of infection we trained a random forest predictor, using a dataset of non-infected cells that divided during the time-lapse movies. We used the top 30 predictive features and trained an ensemble of 500 decision trees. The figure shows the performance of the predictor on an independent test set. The predictor calculates the time from last mitosis with an rmse of 3.85. the Pearson correlation coefficient was 0.83.

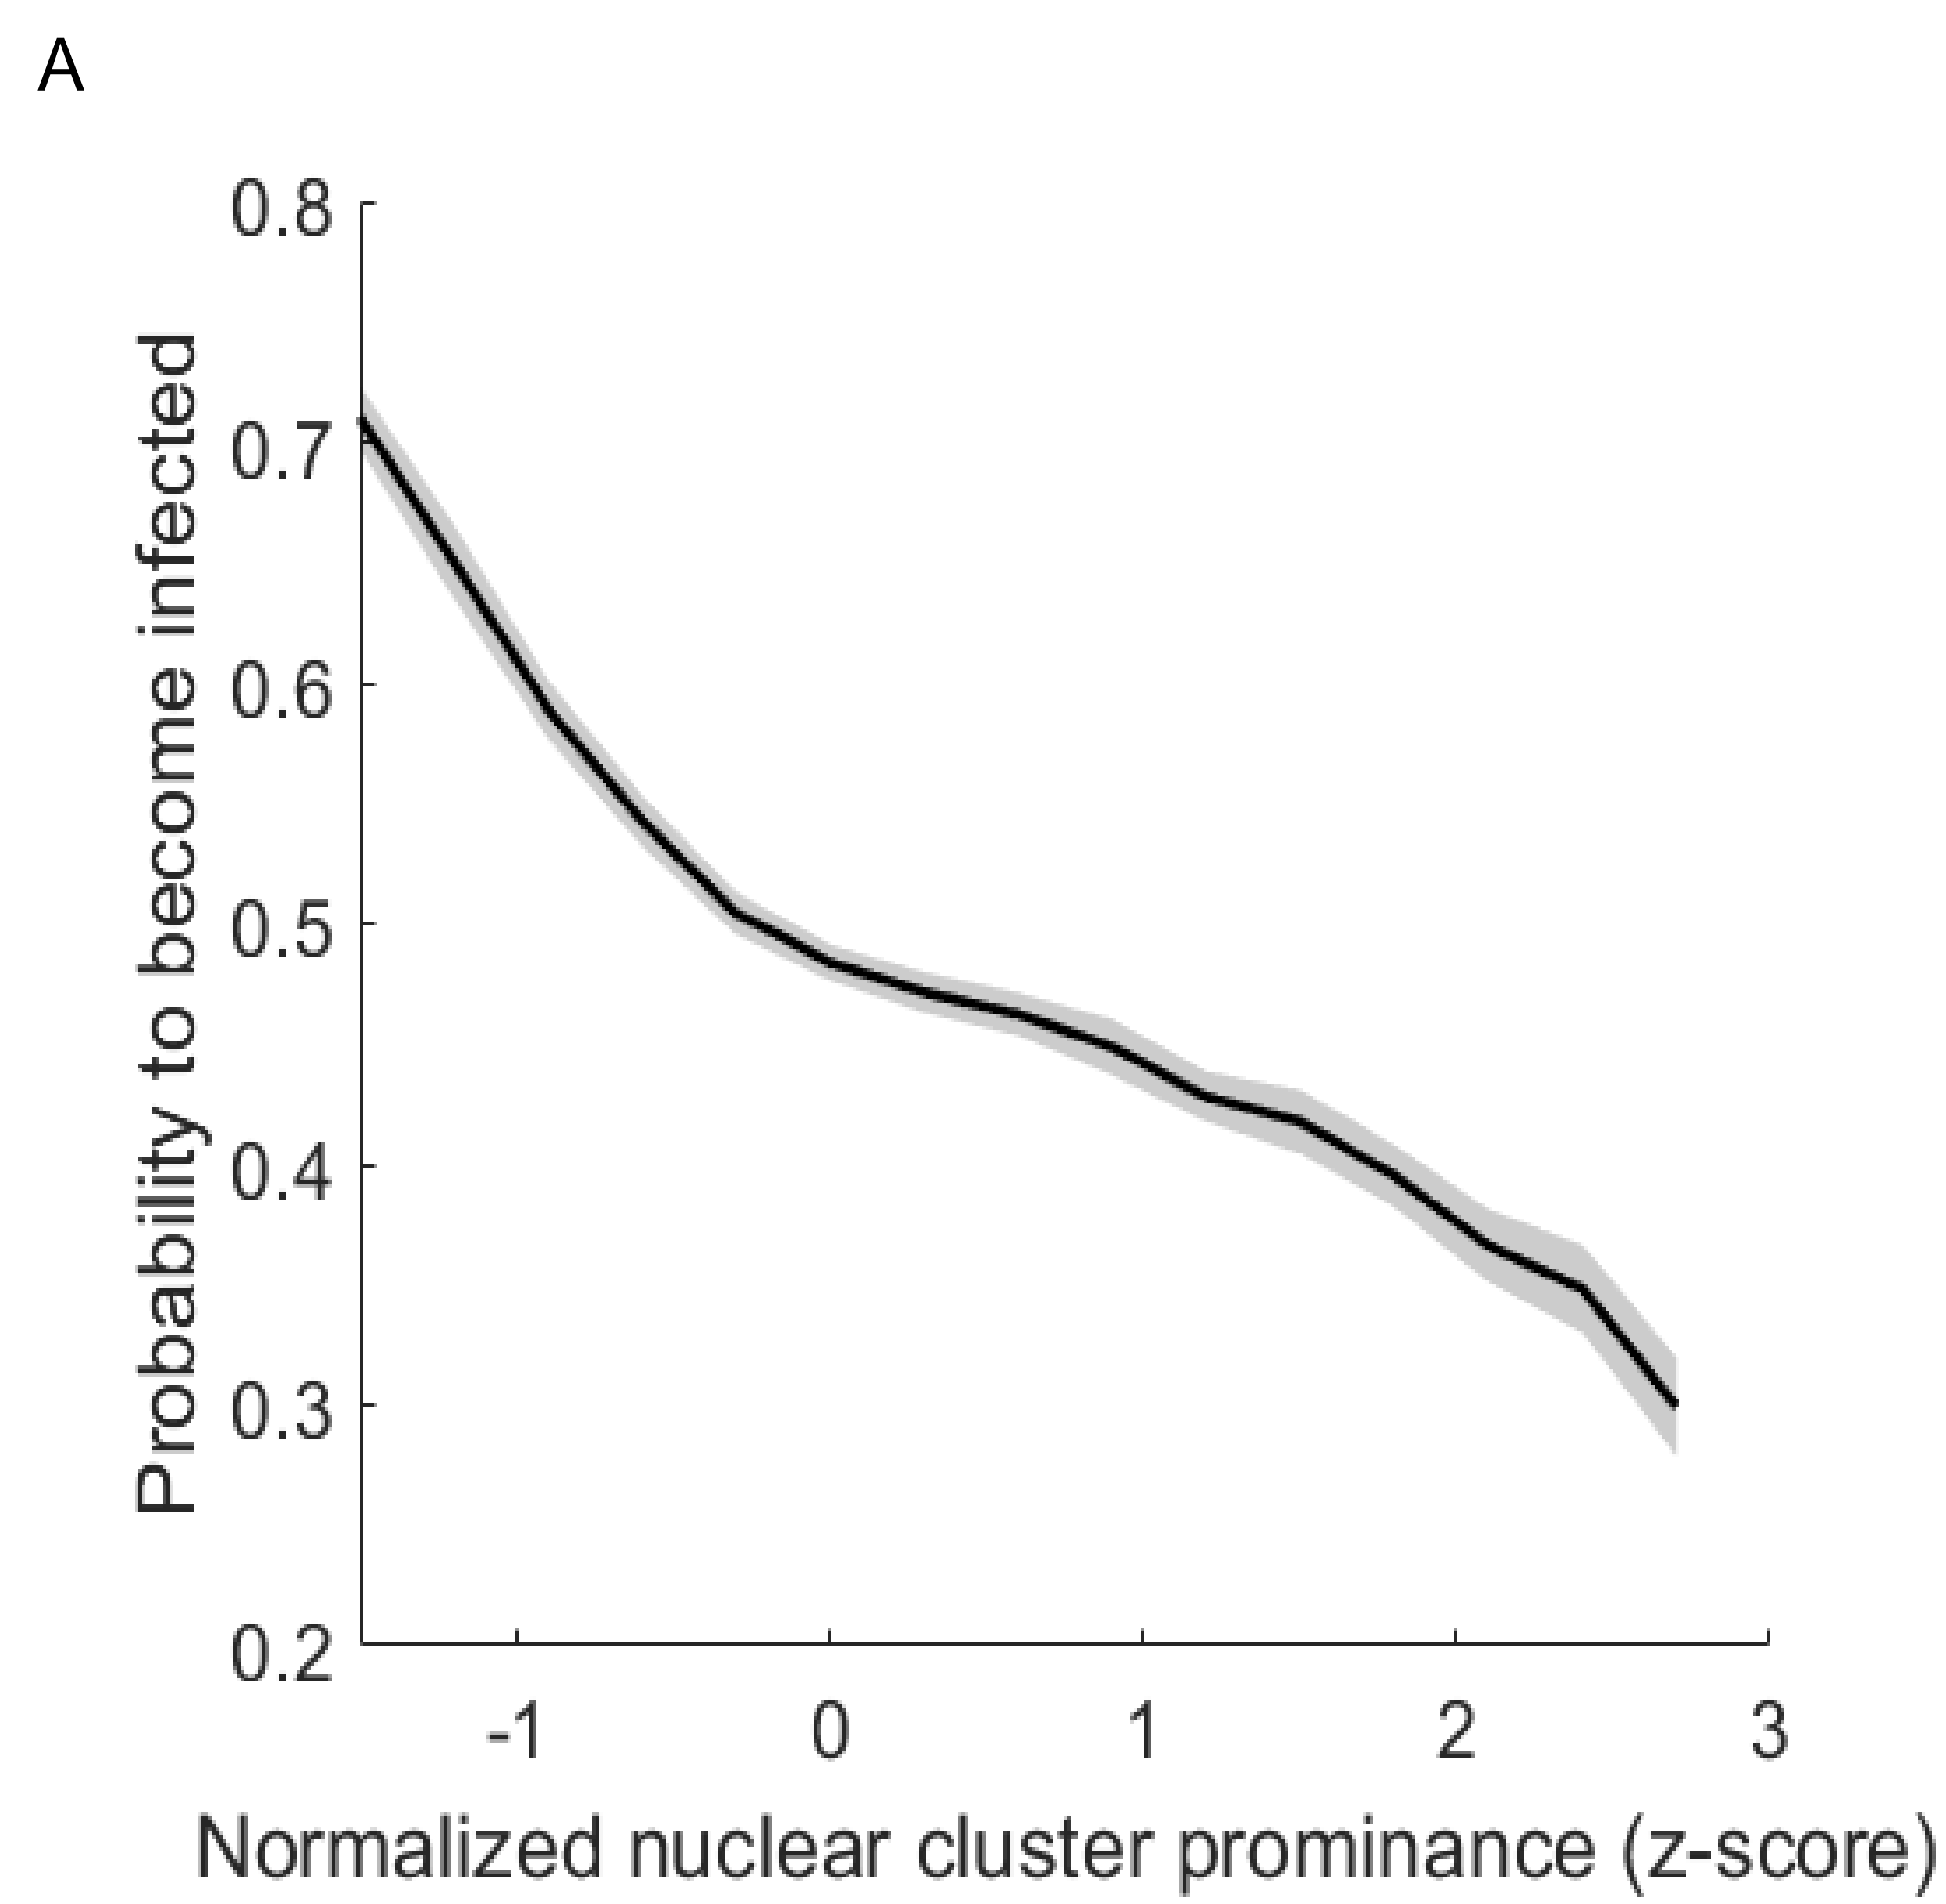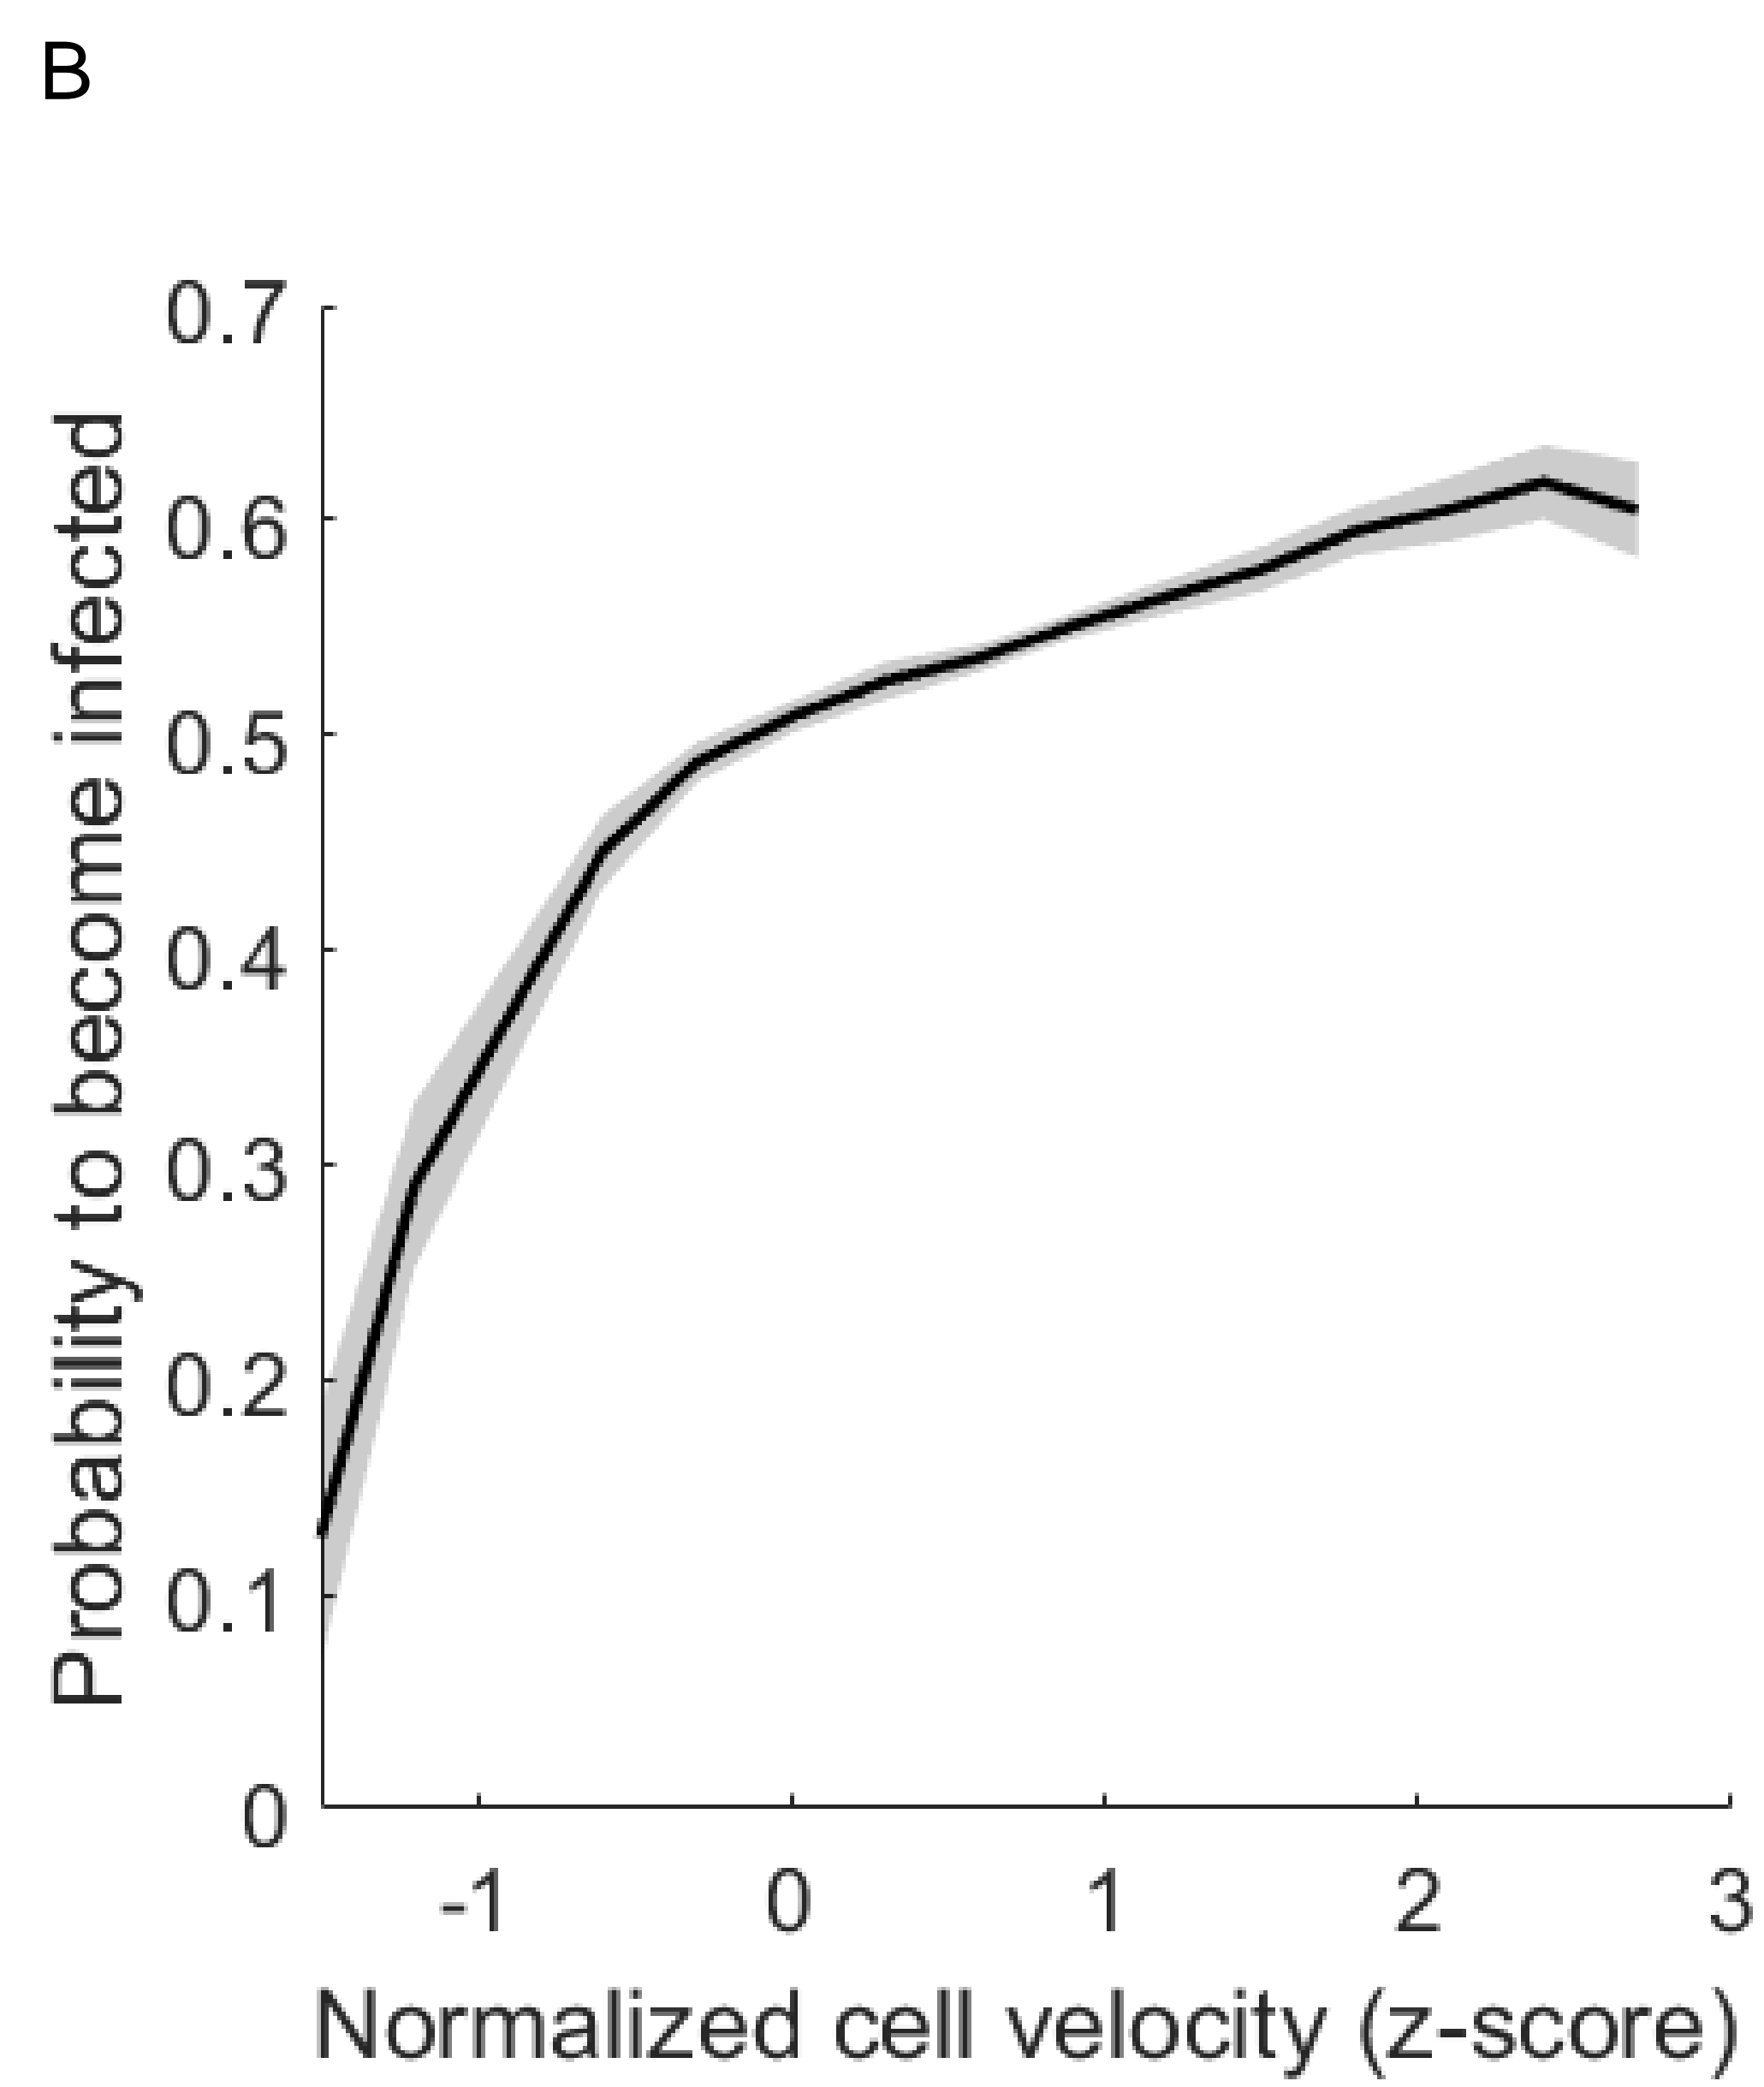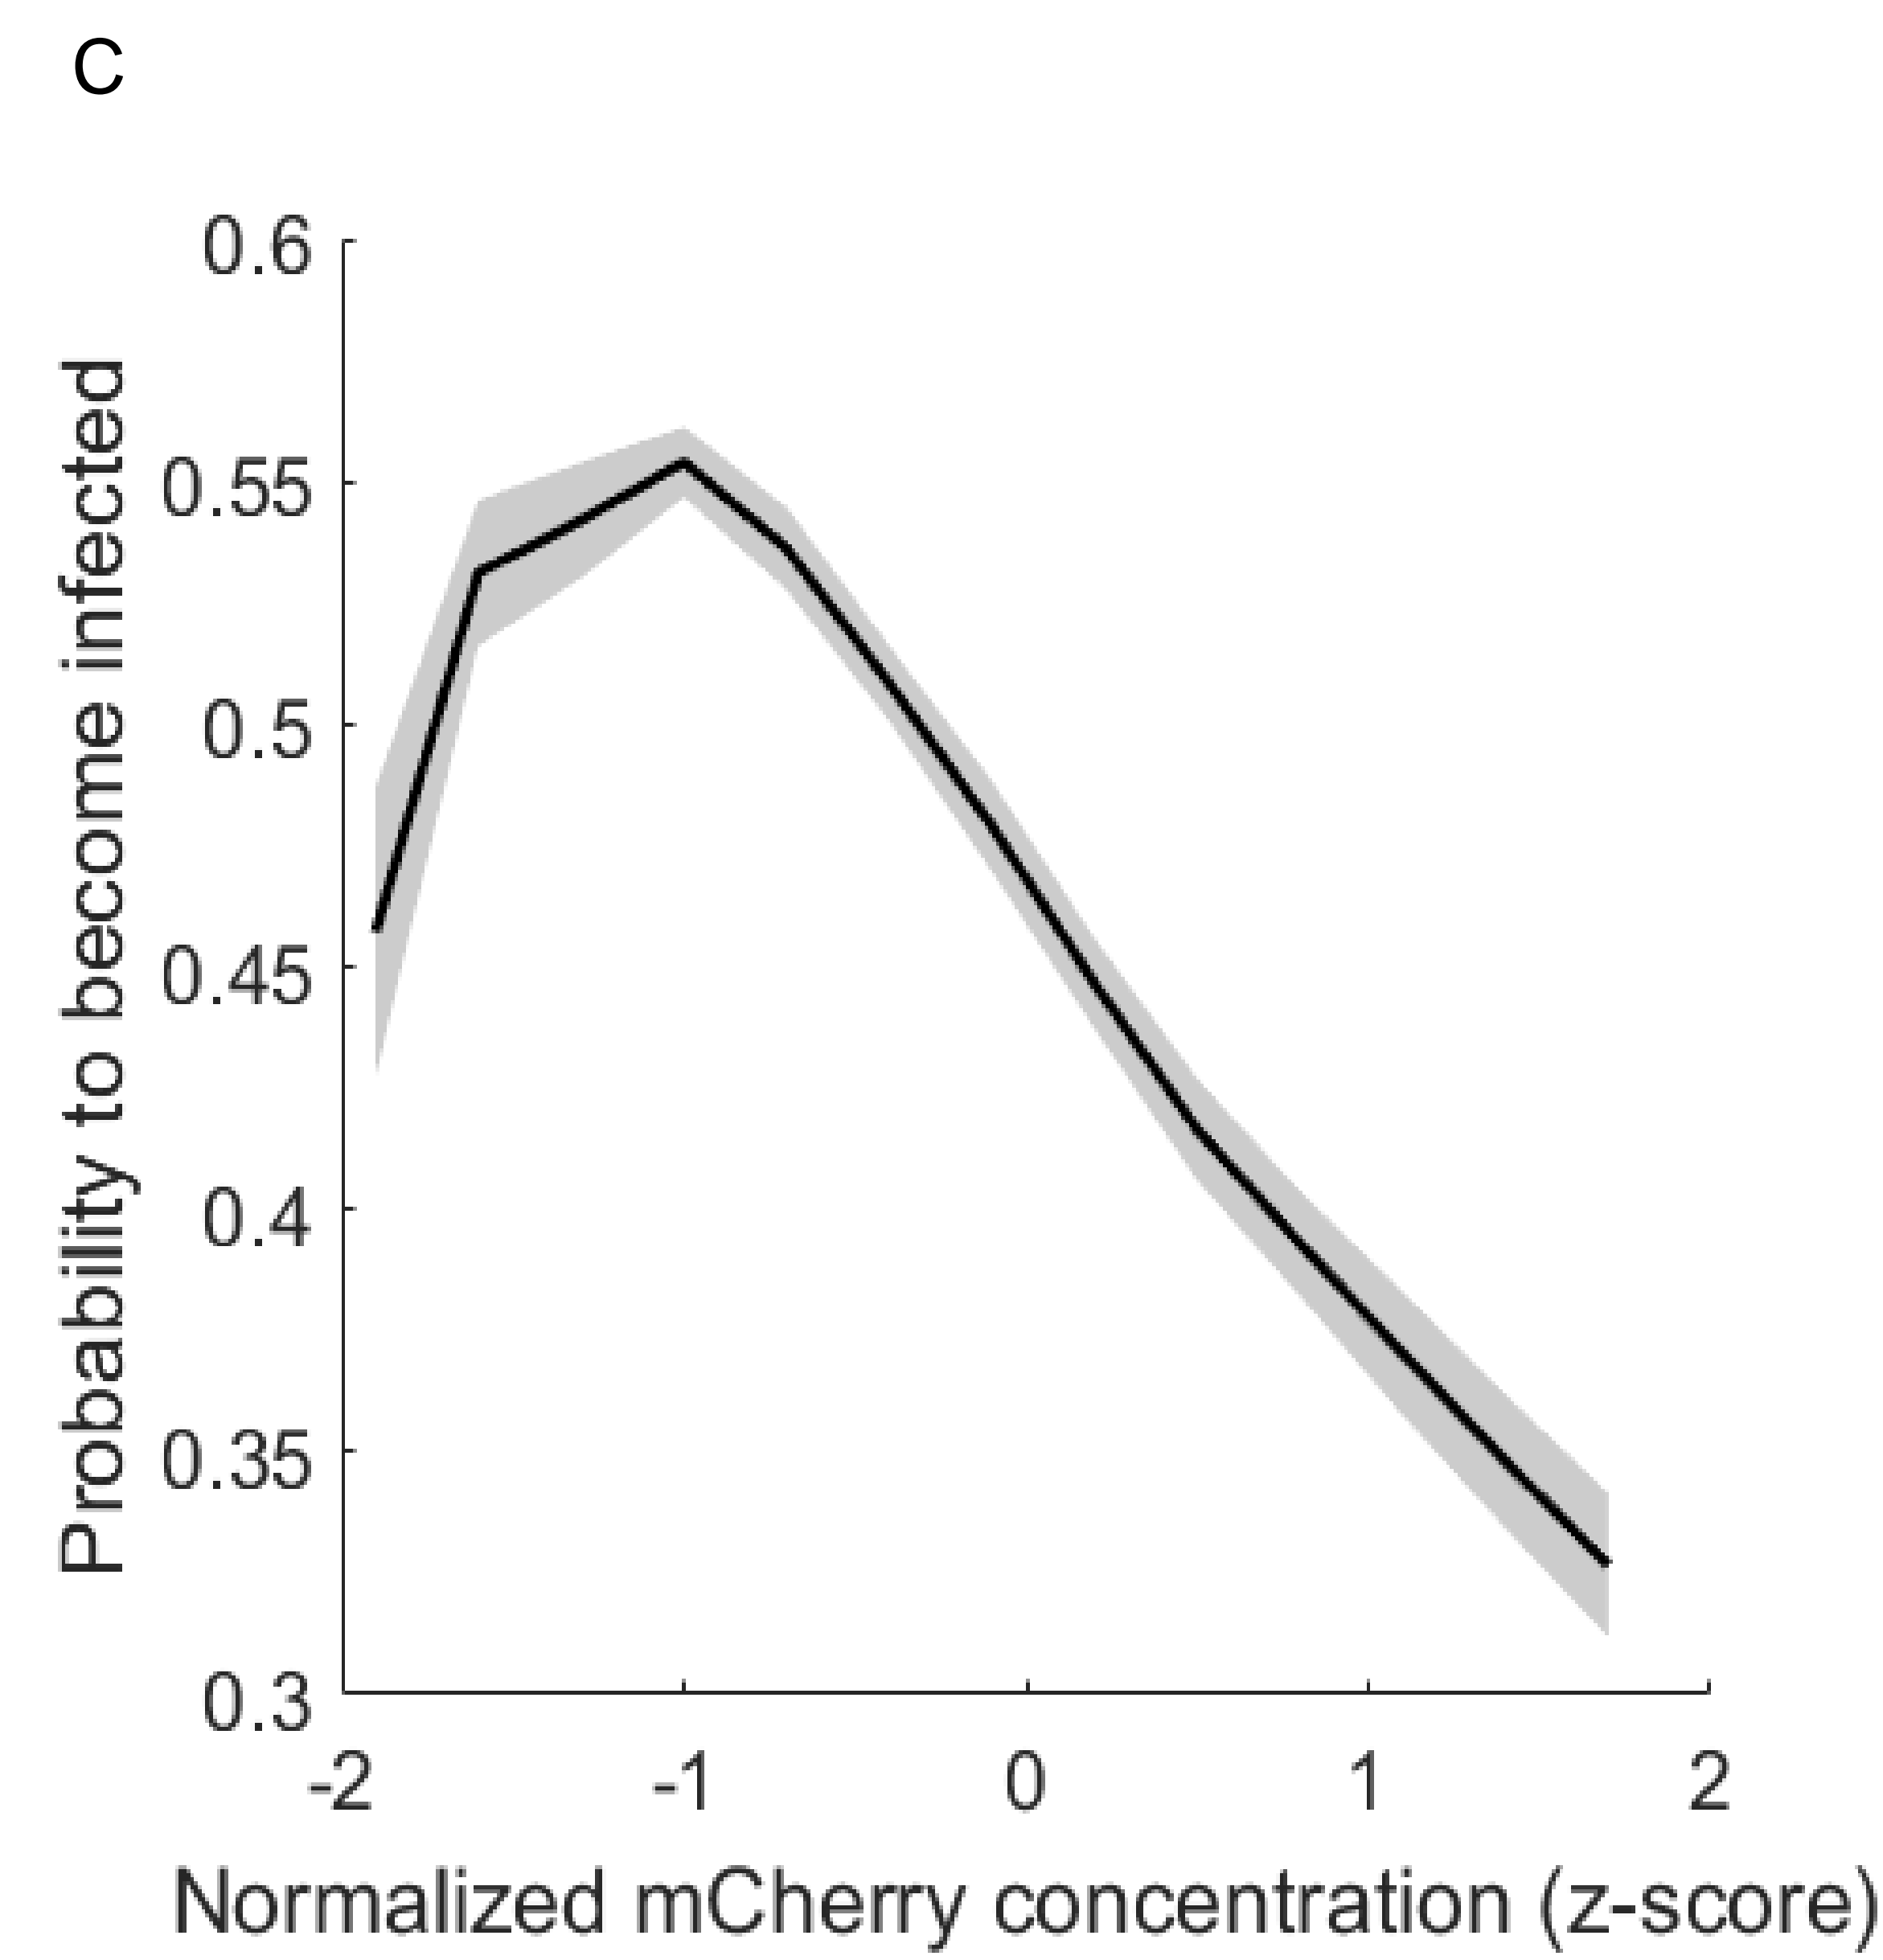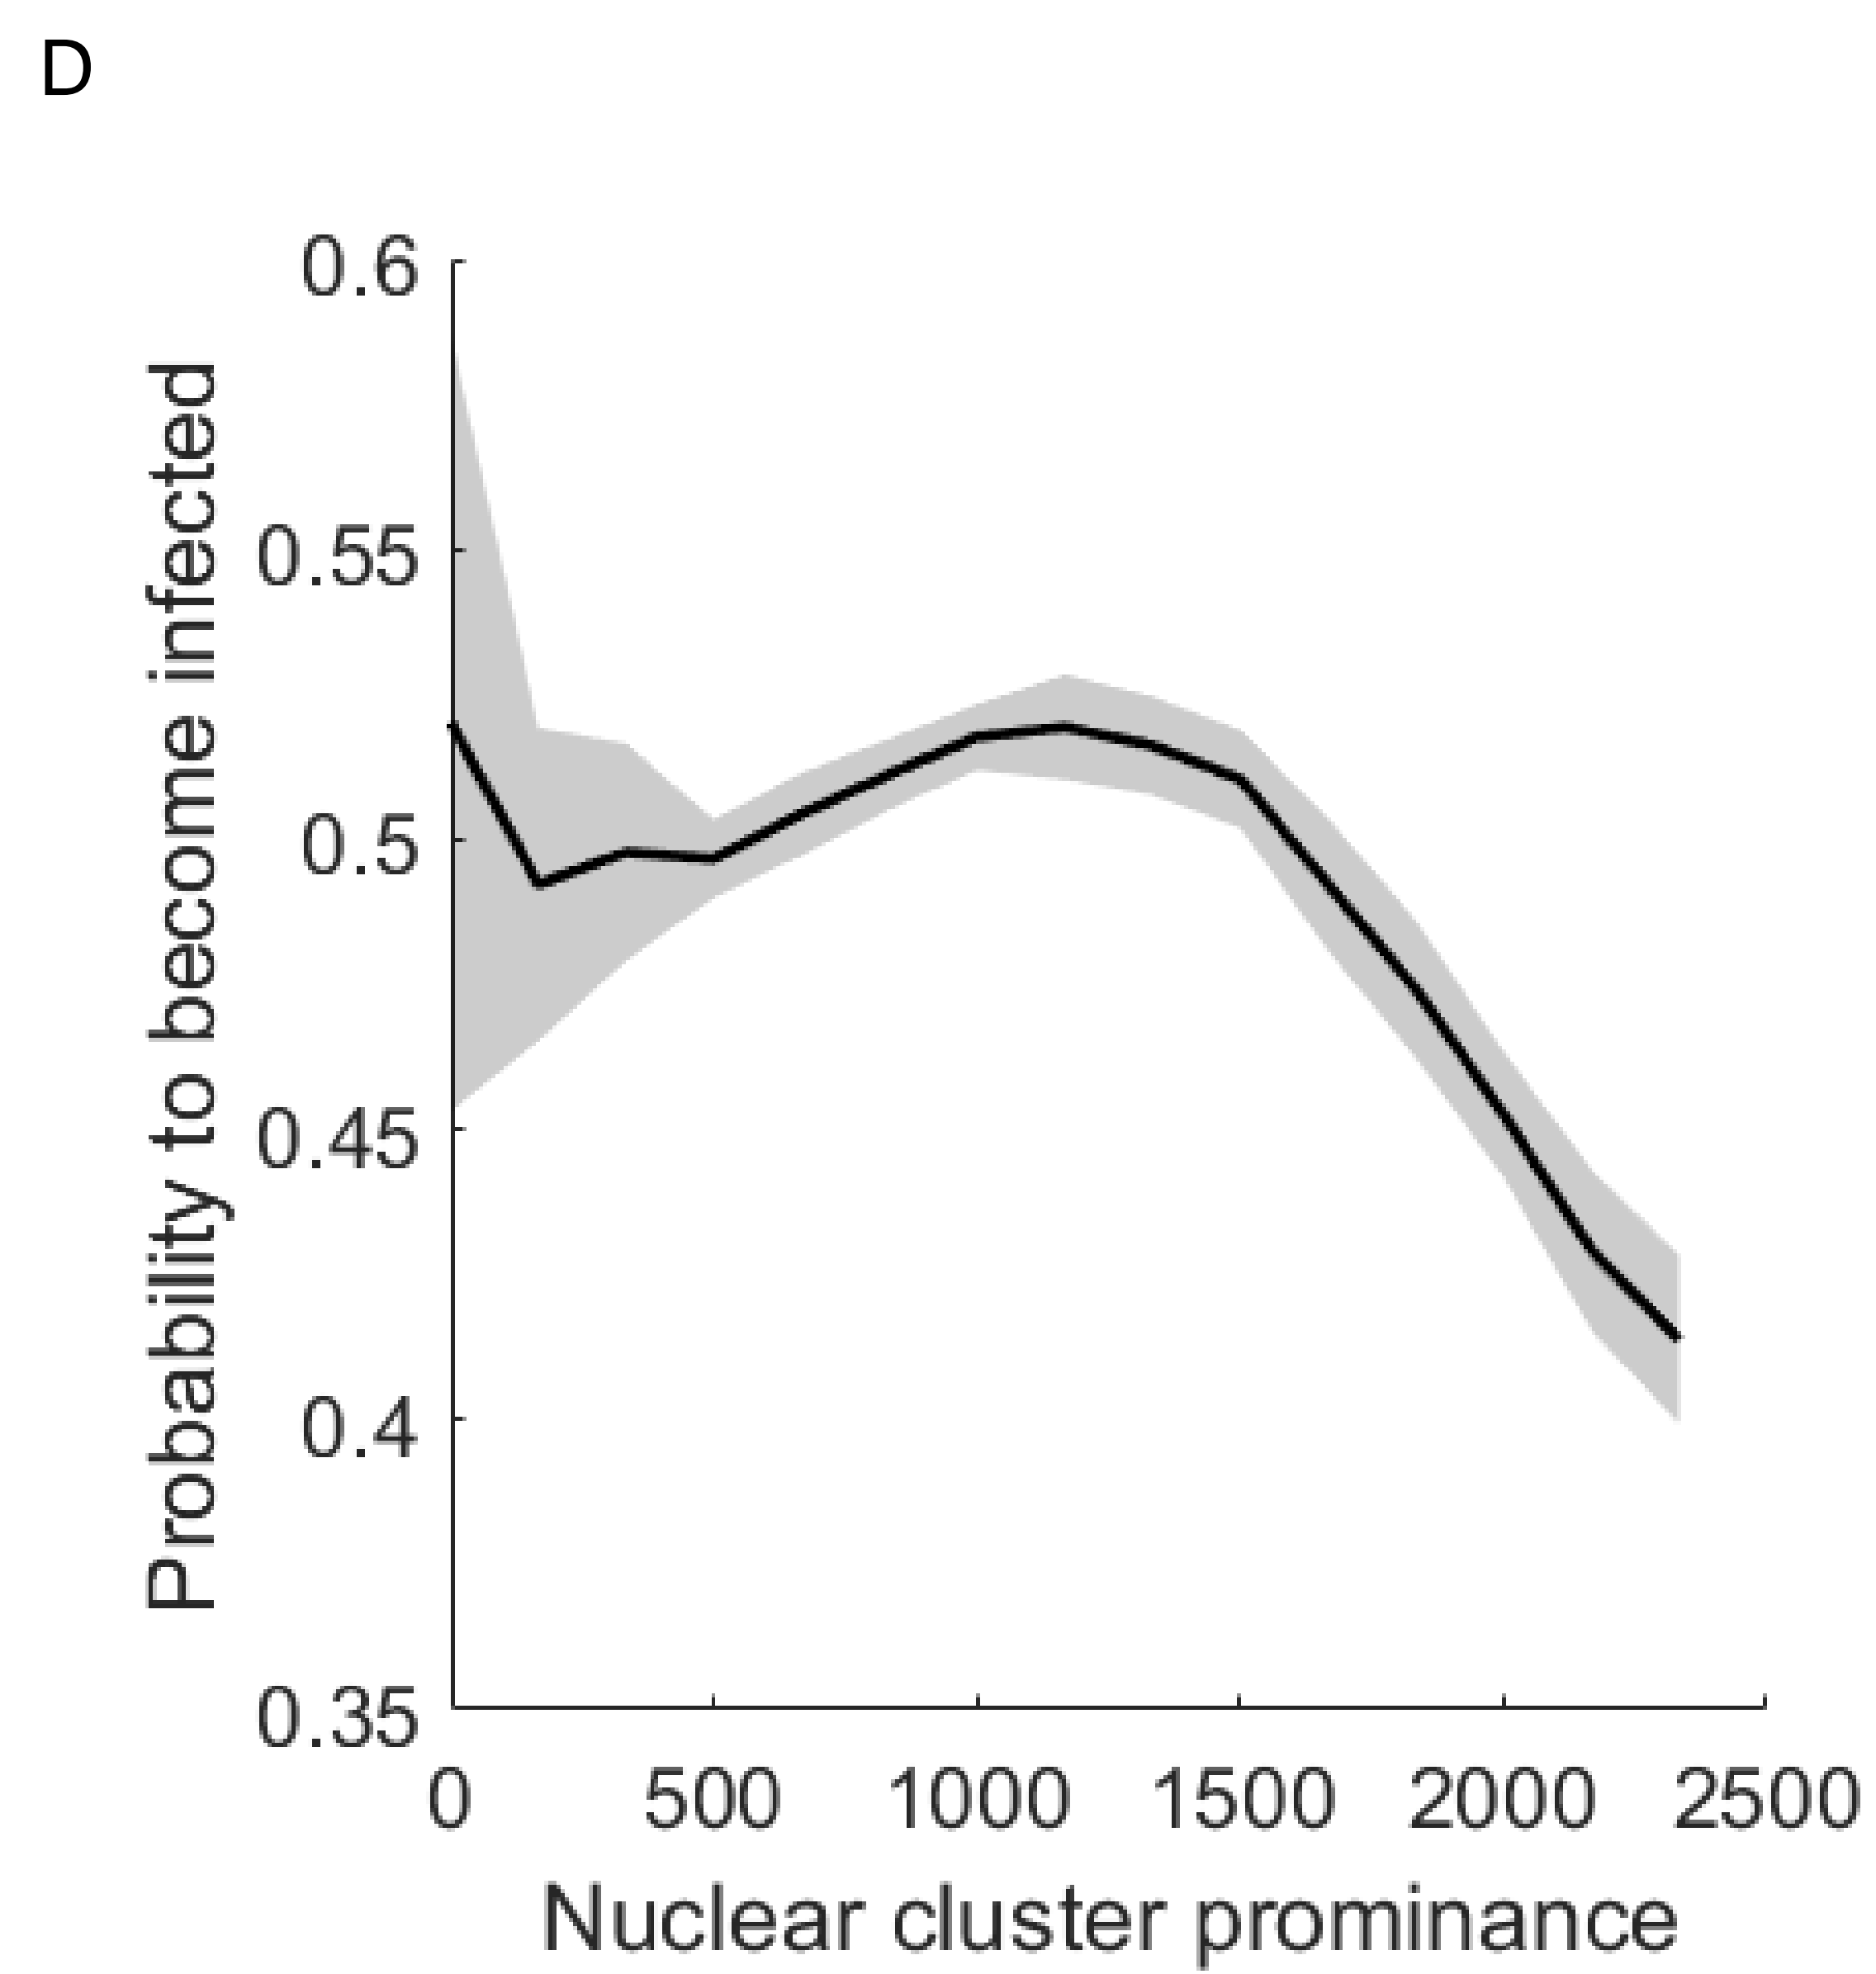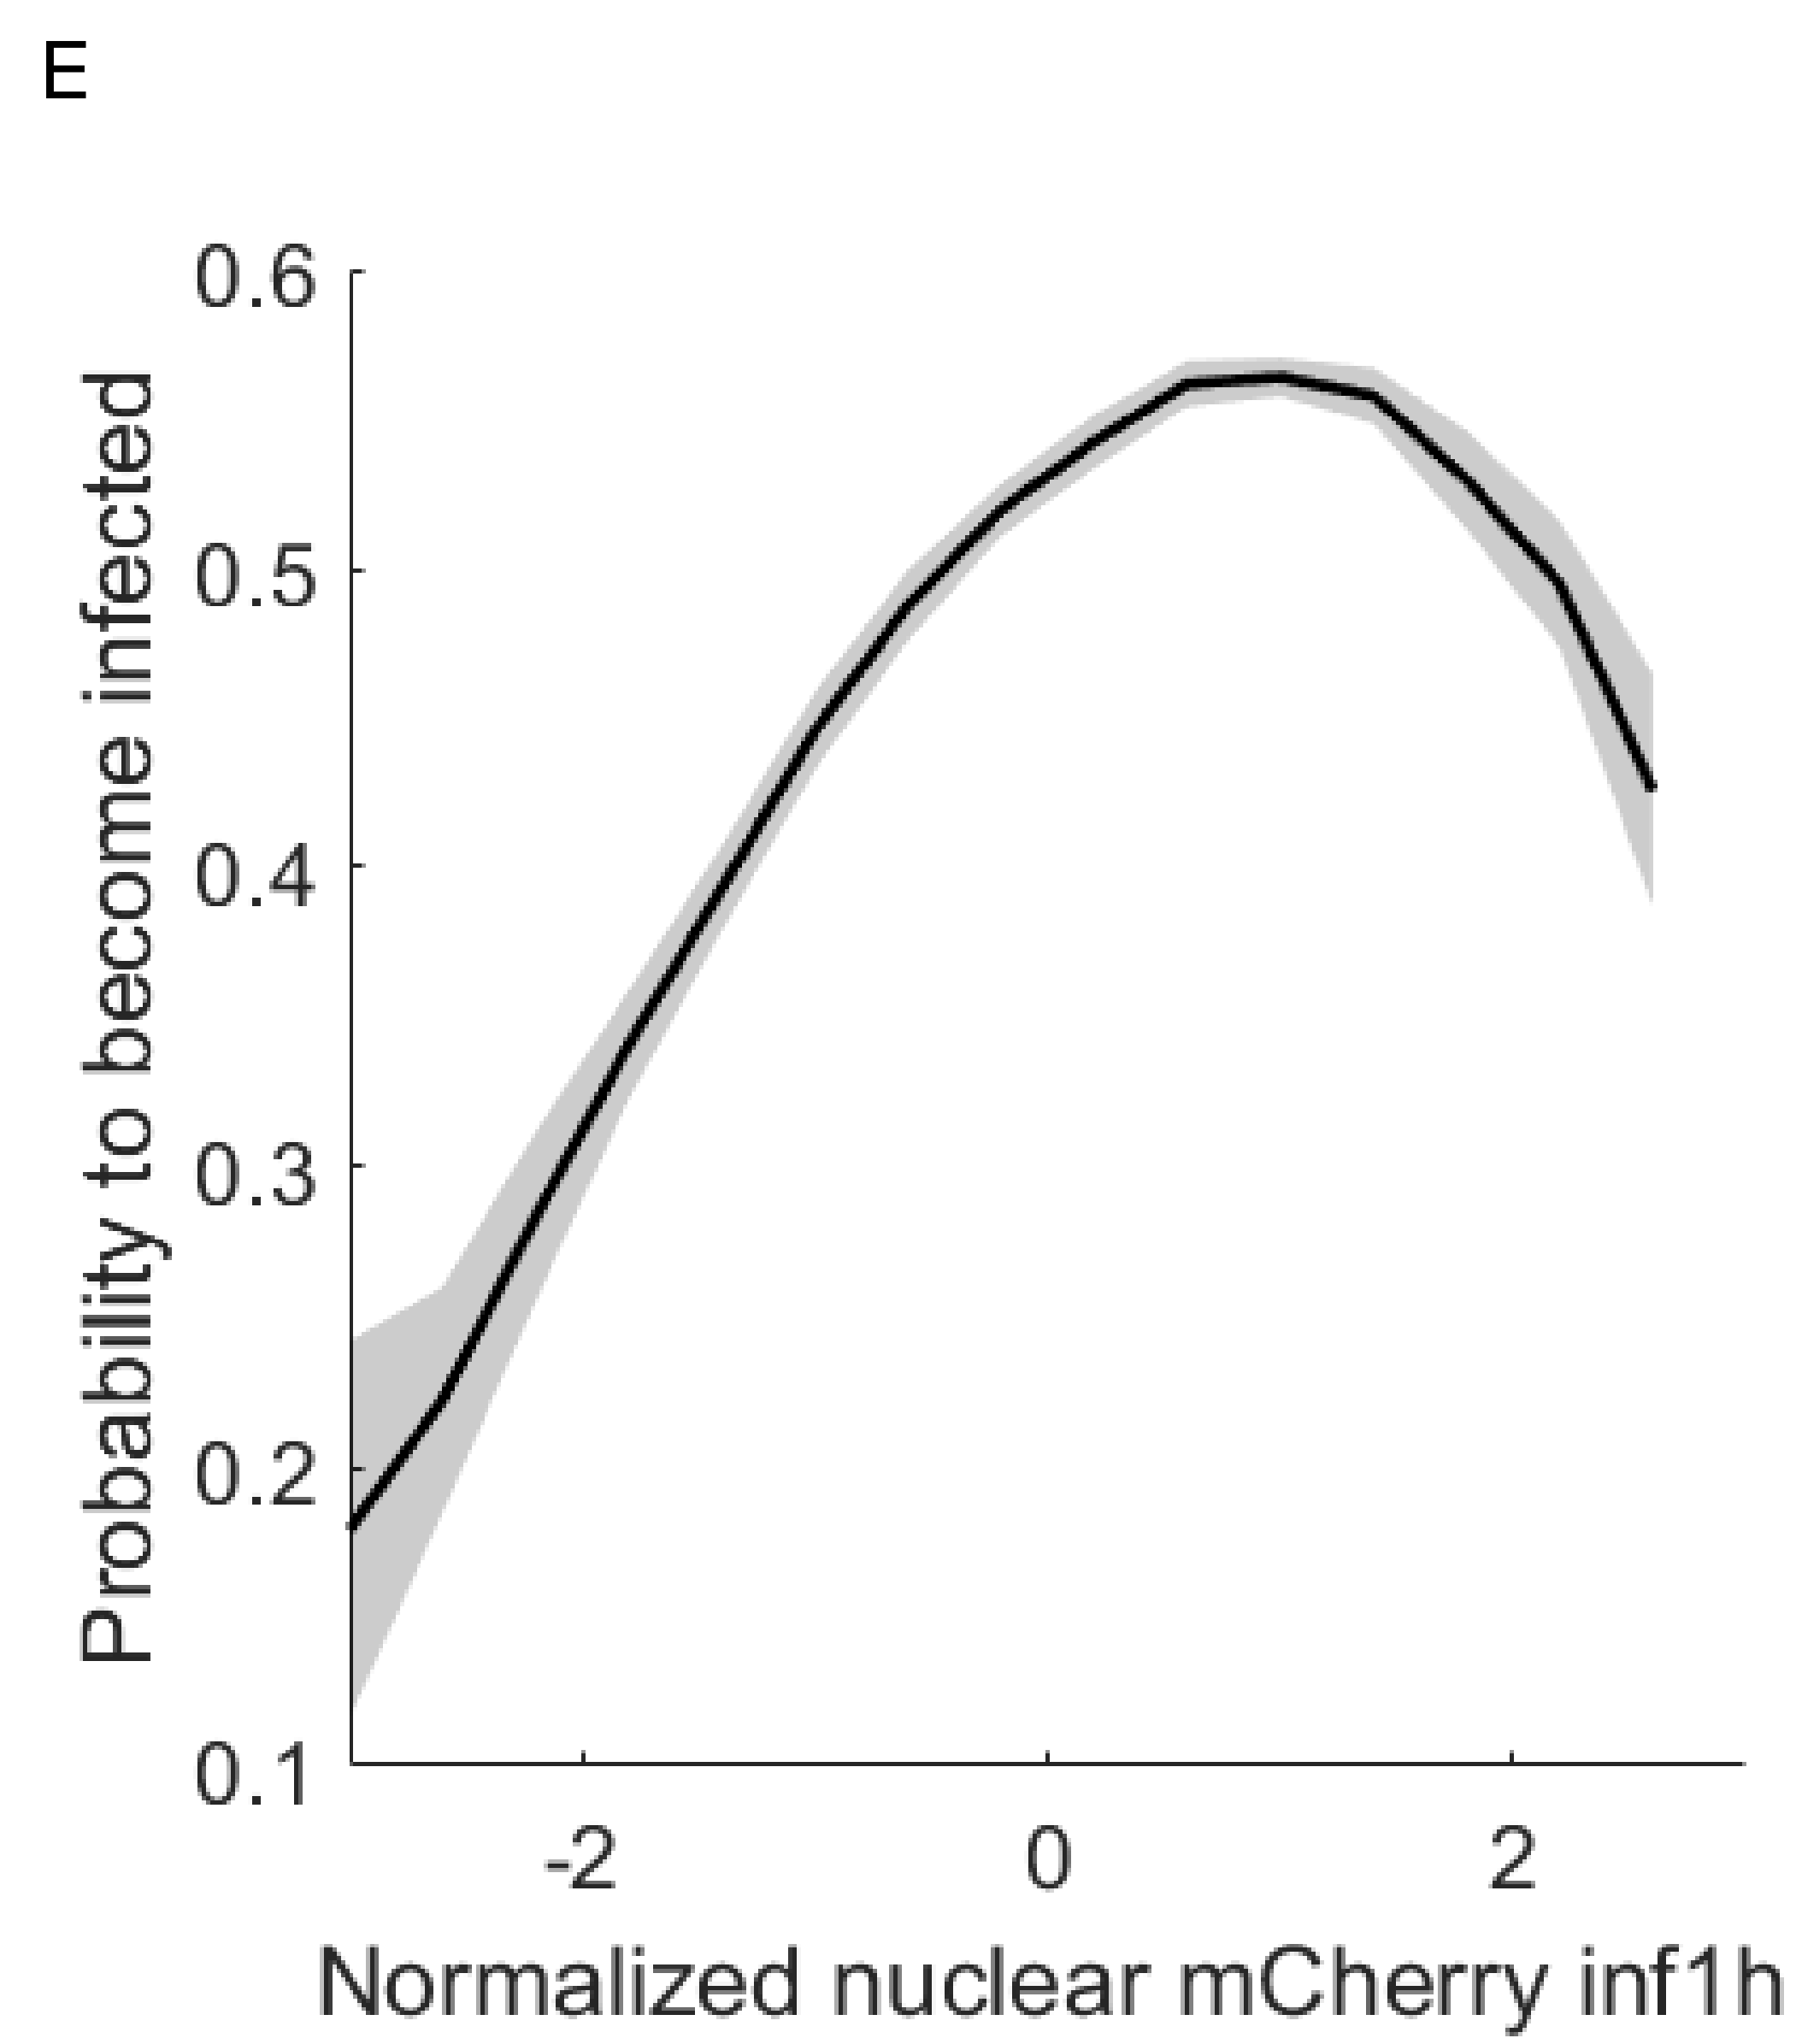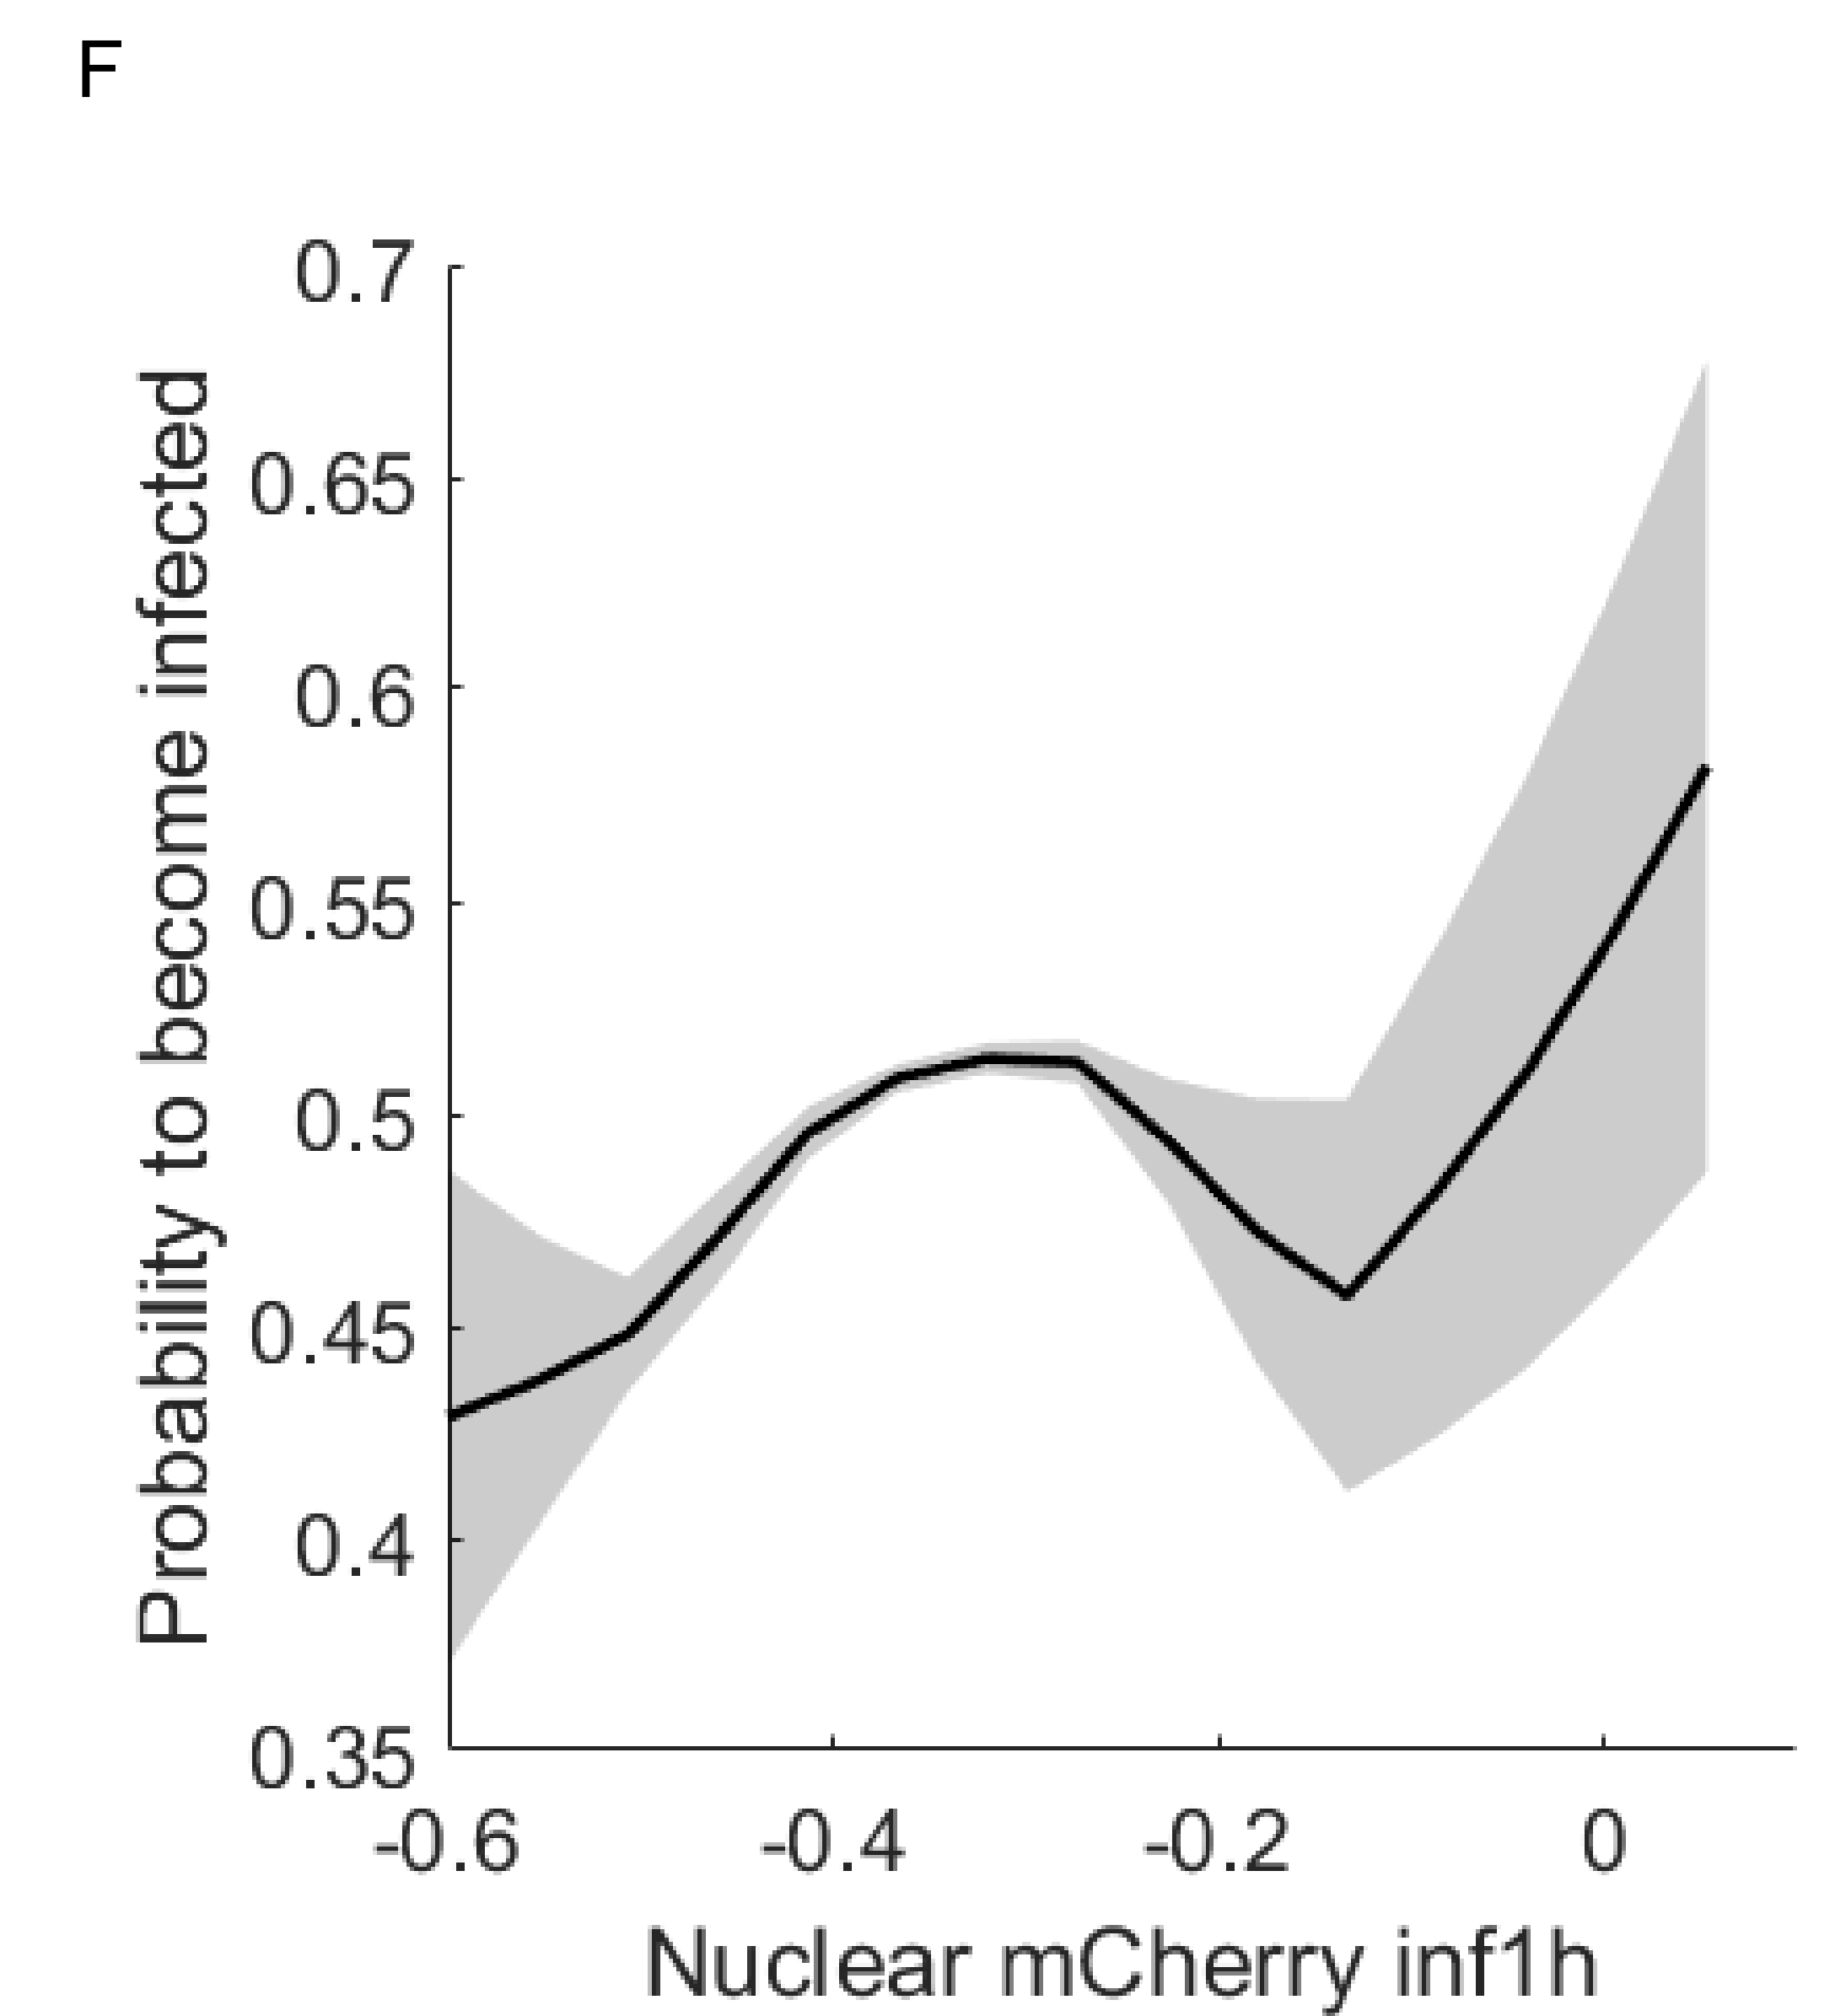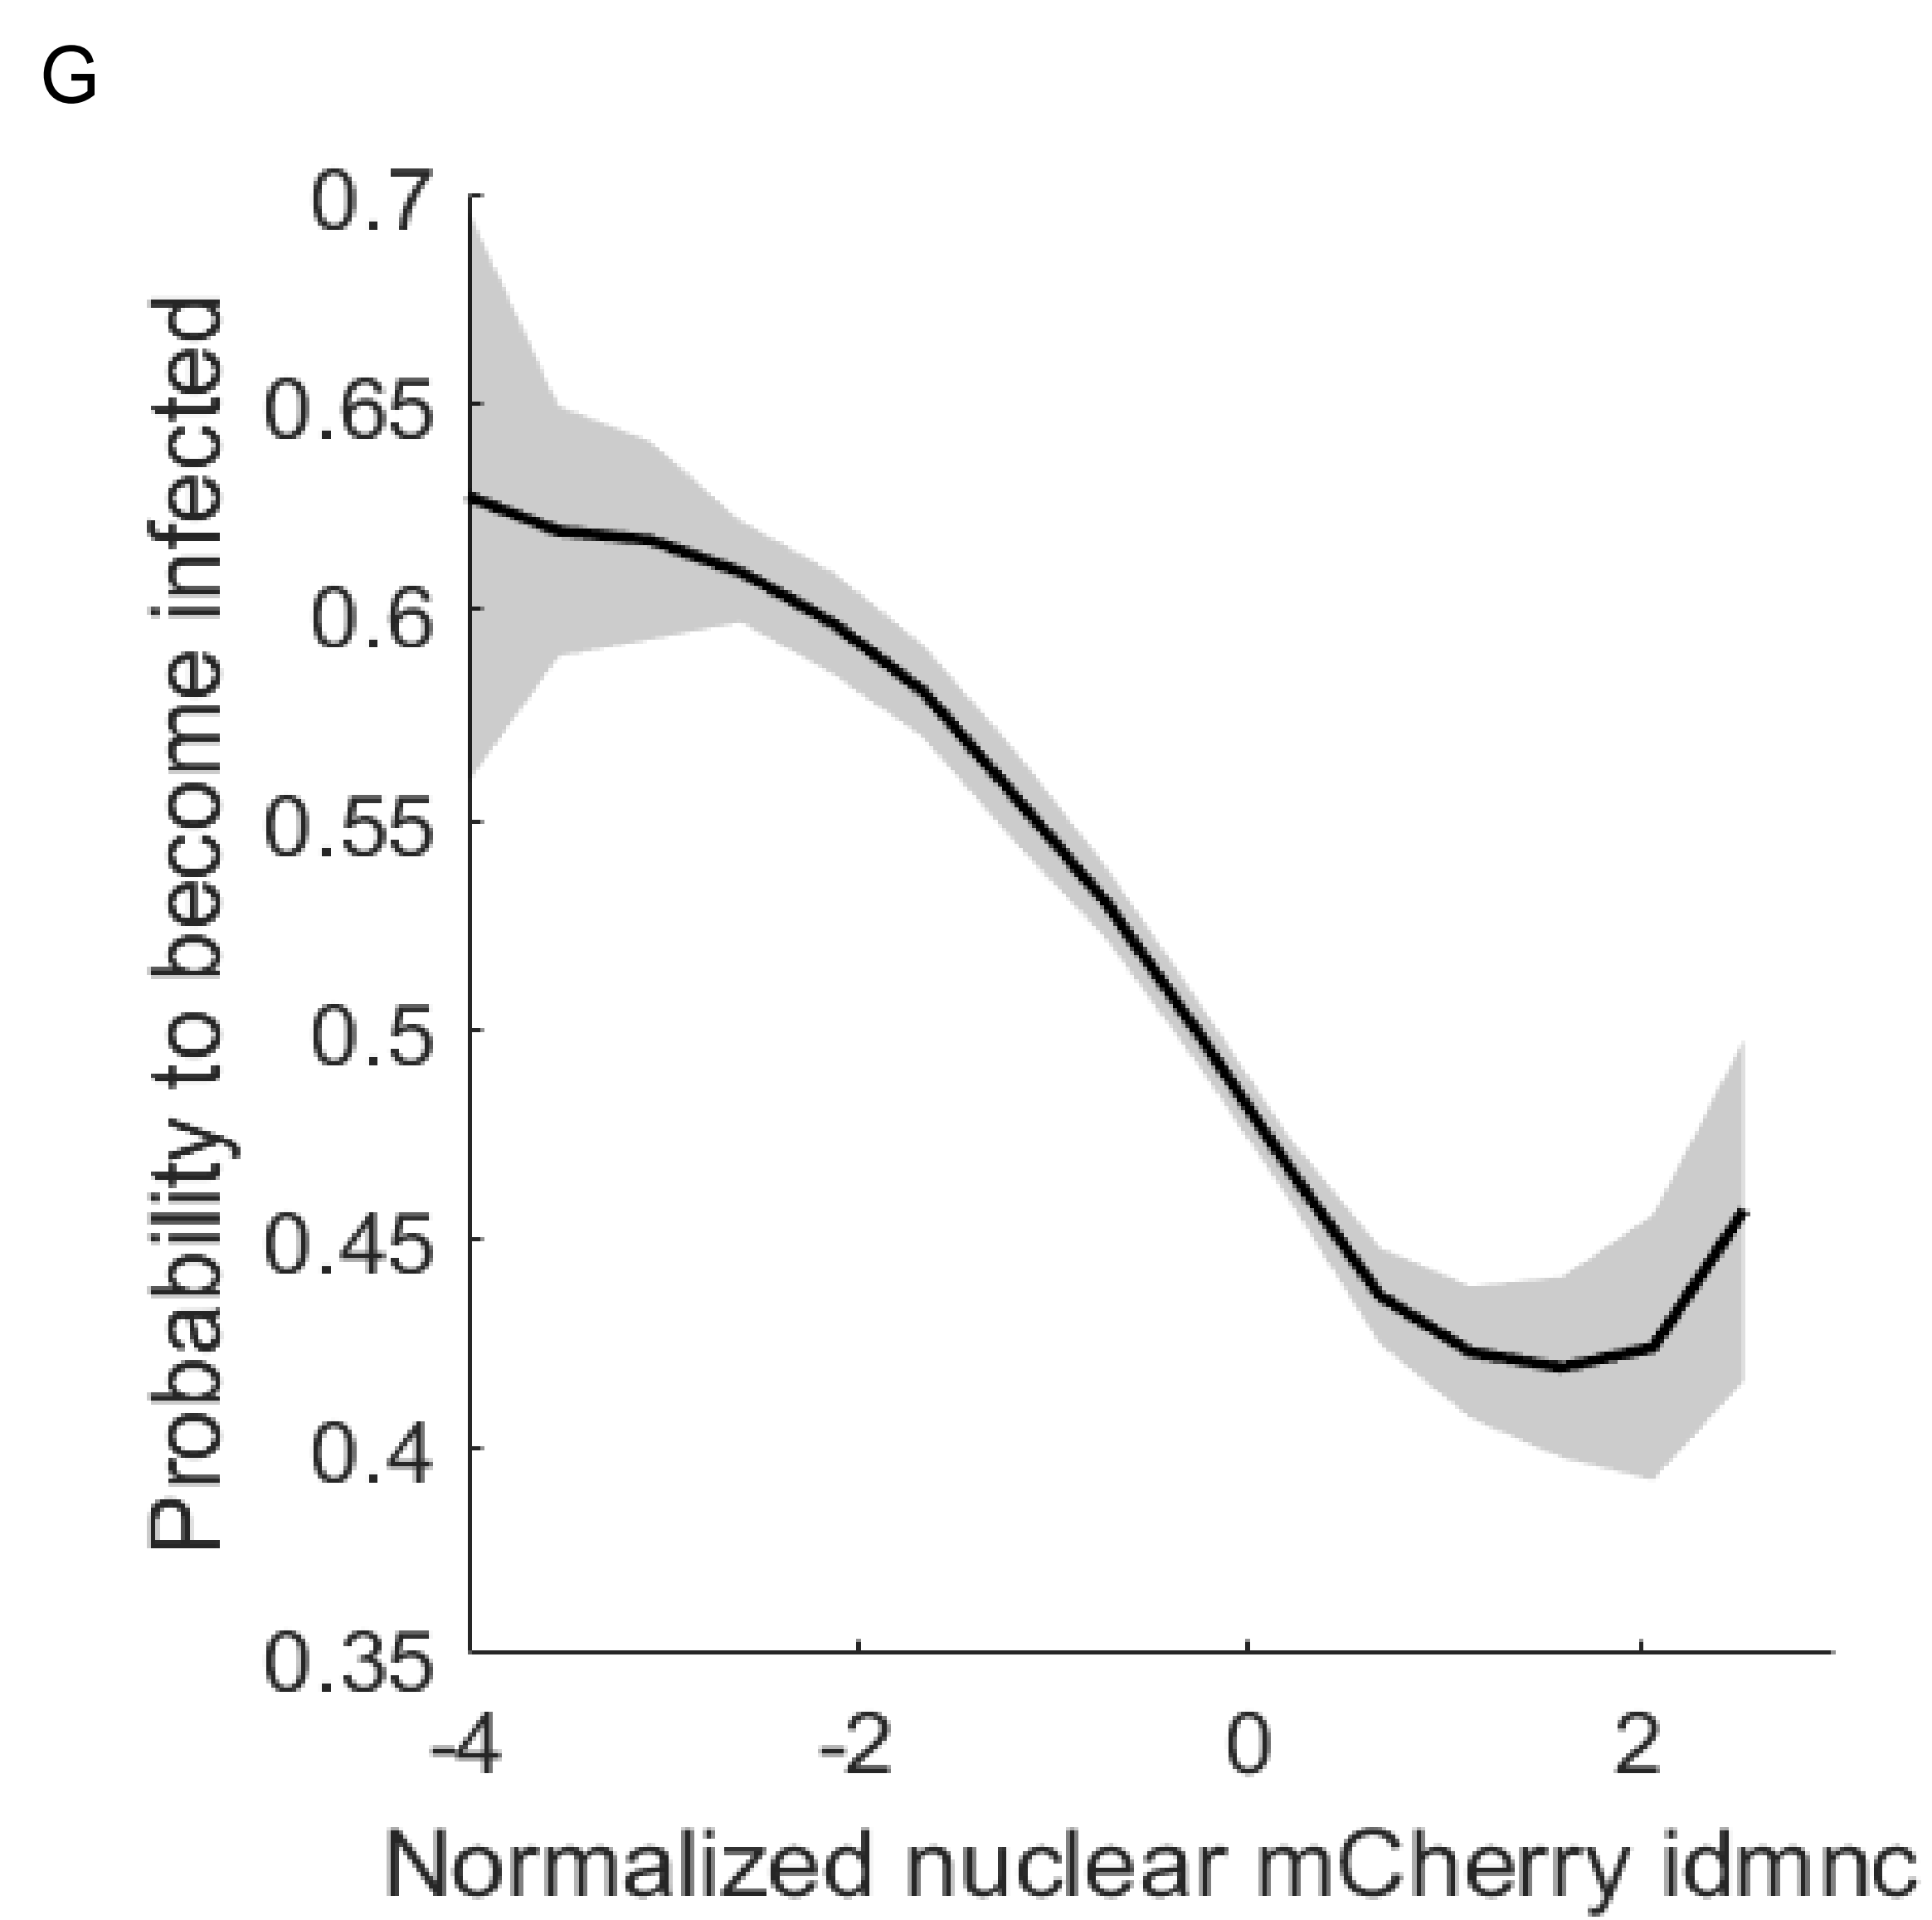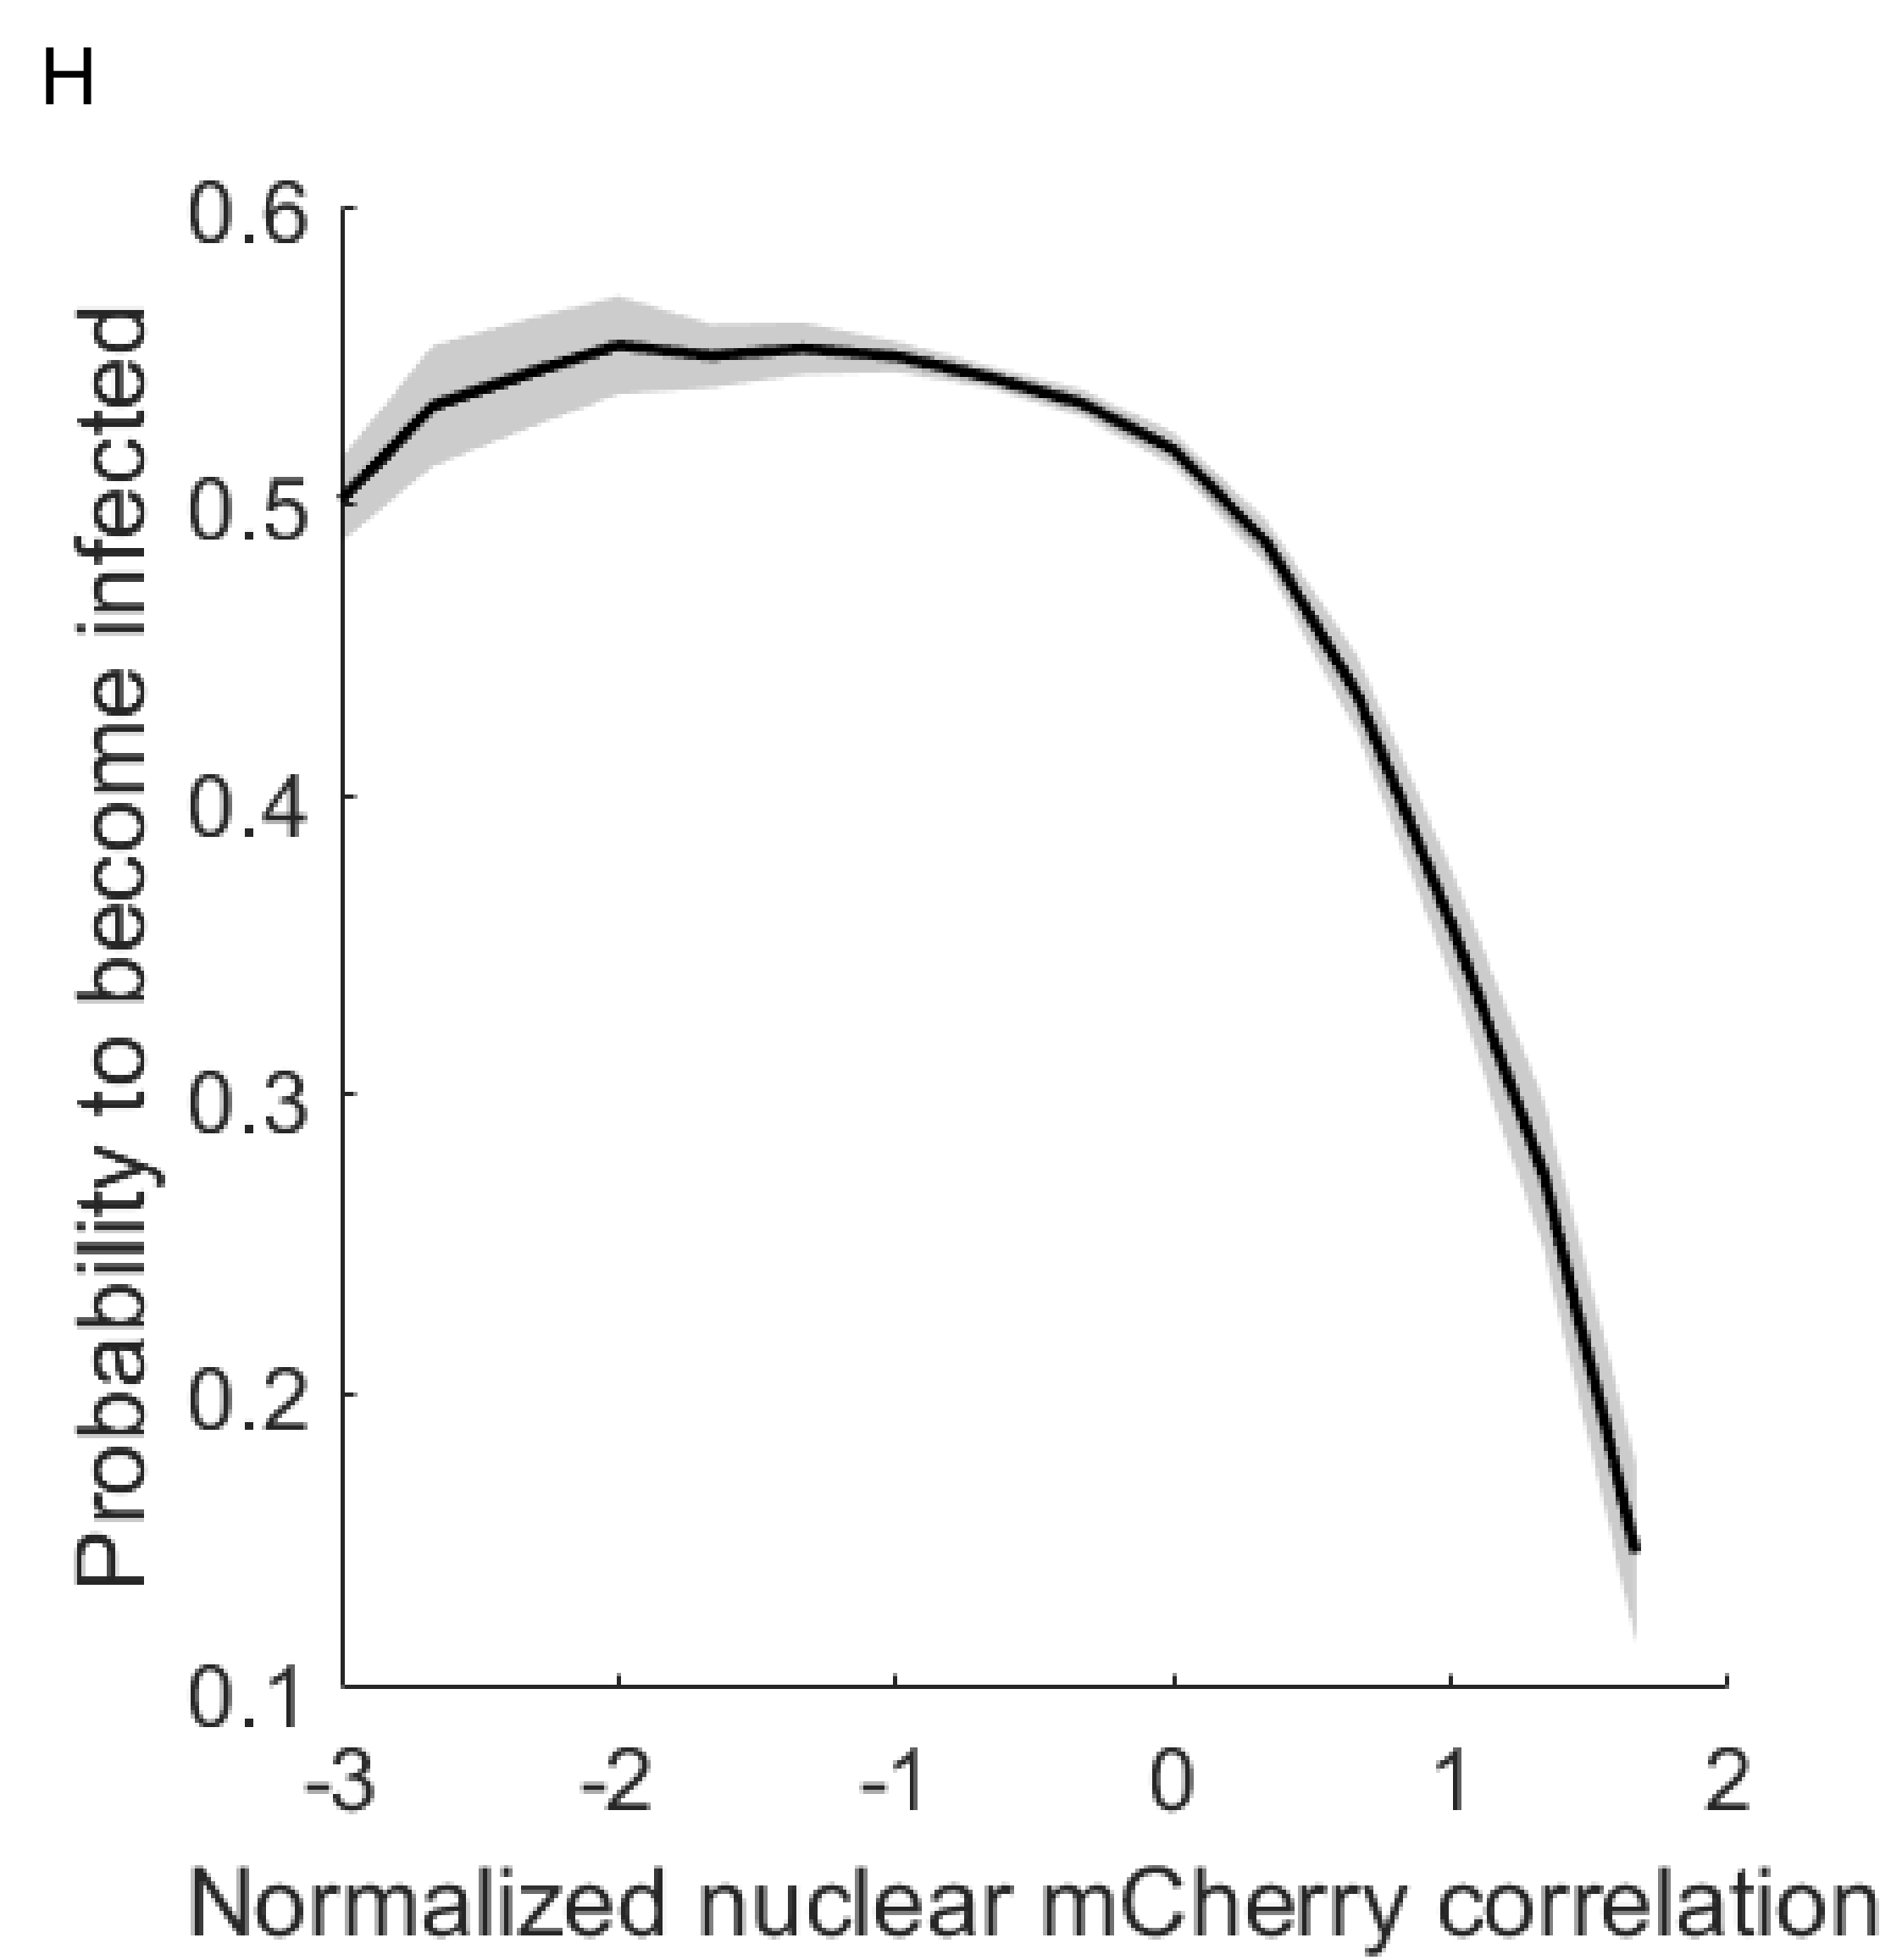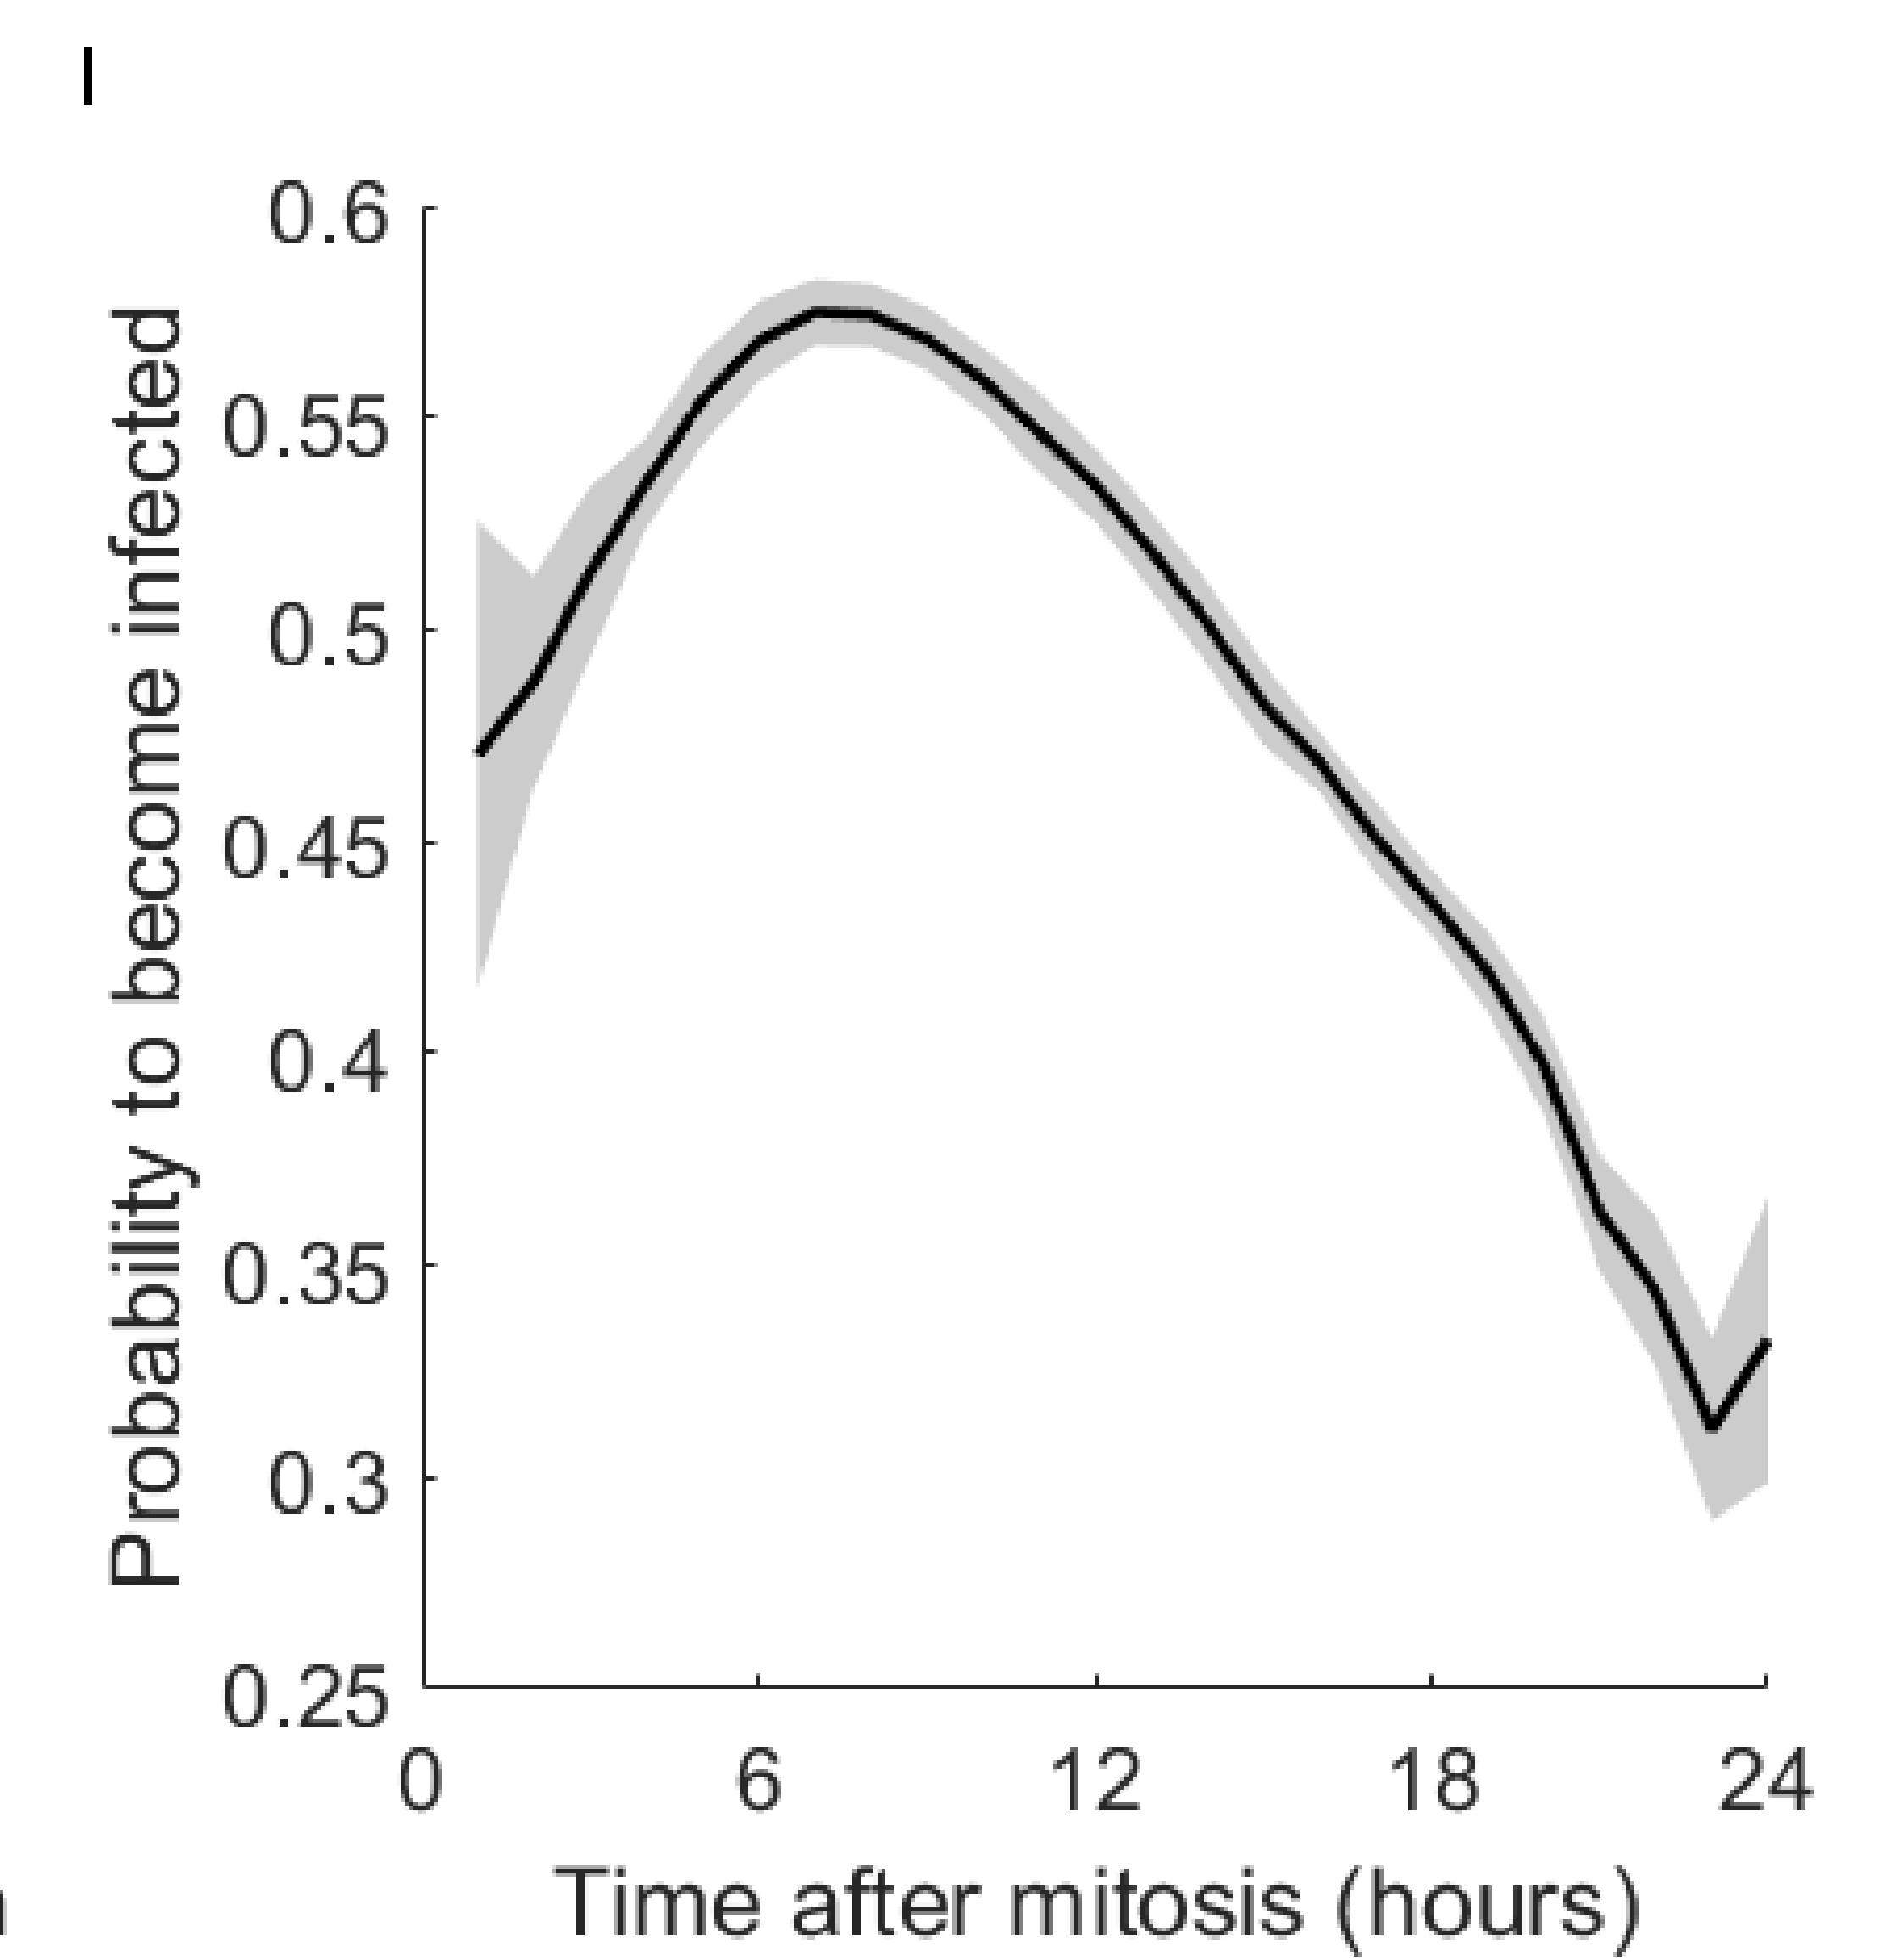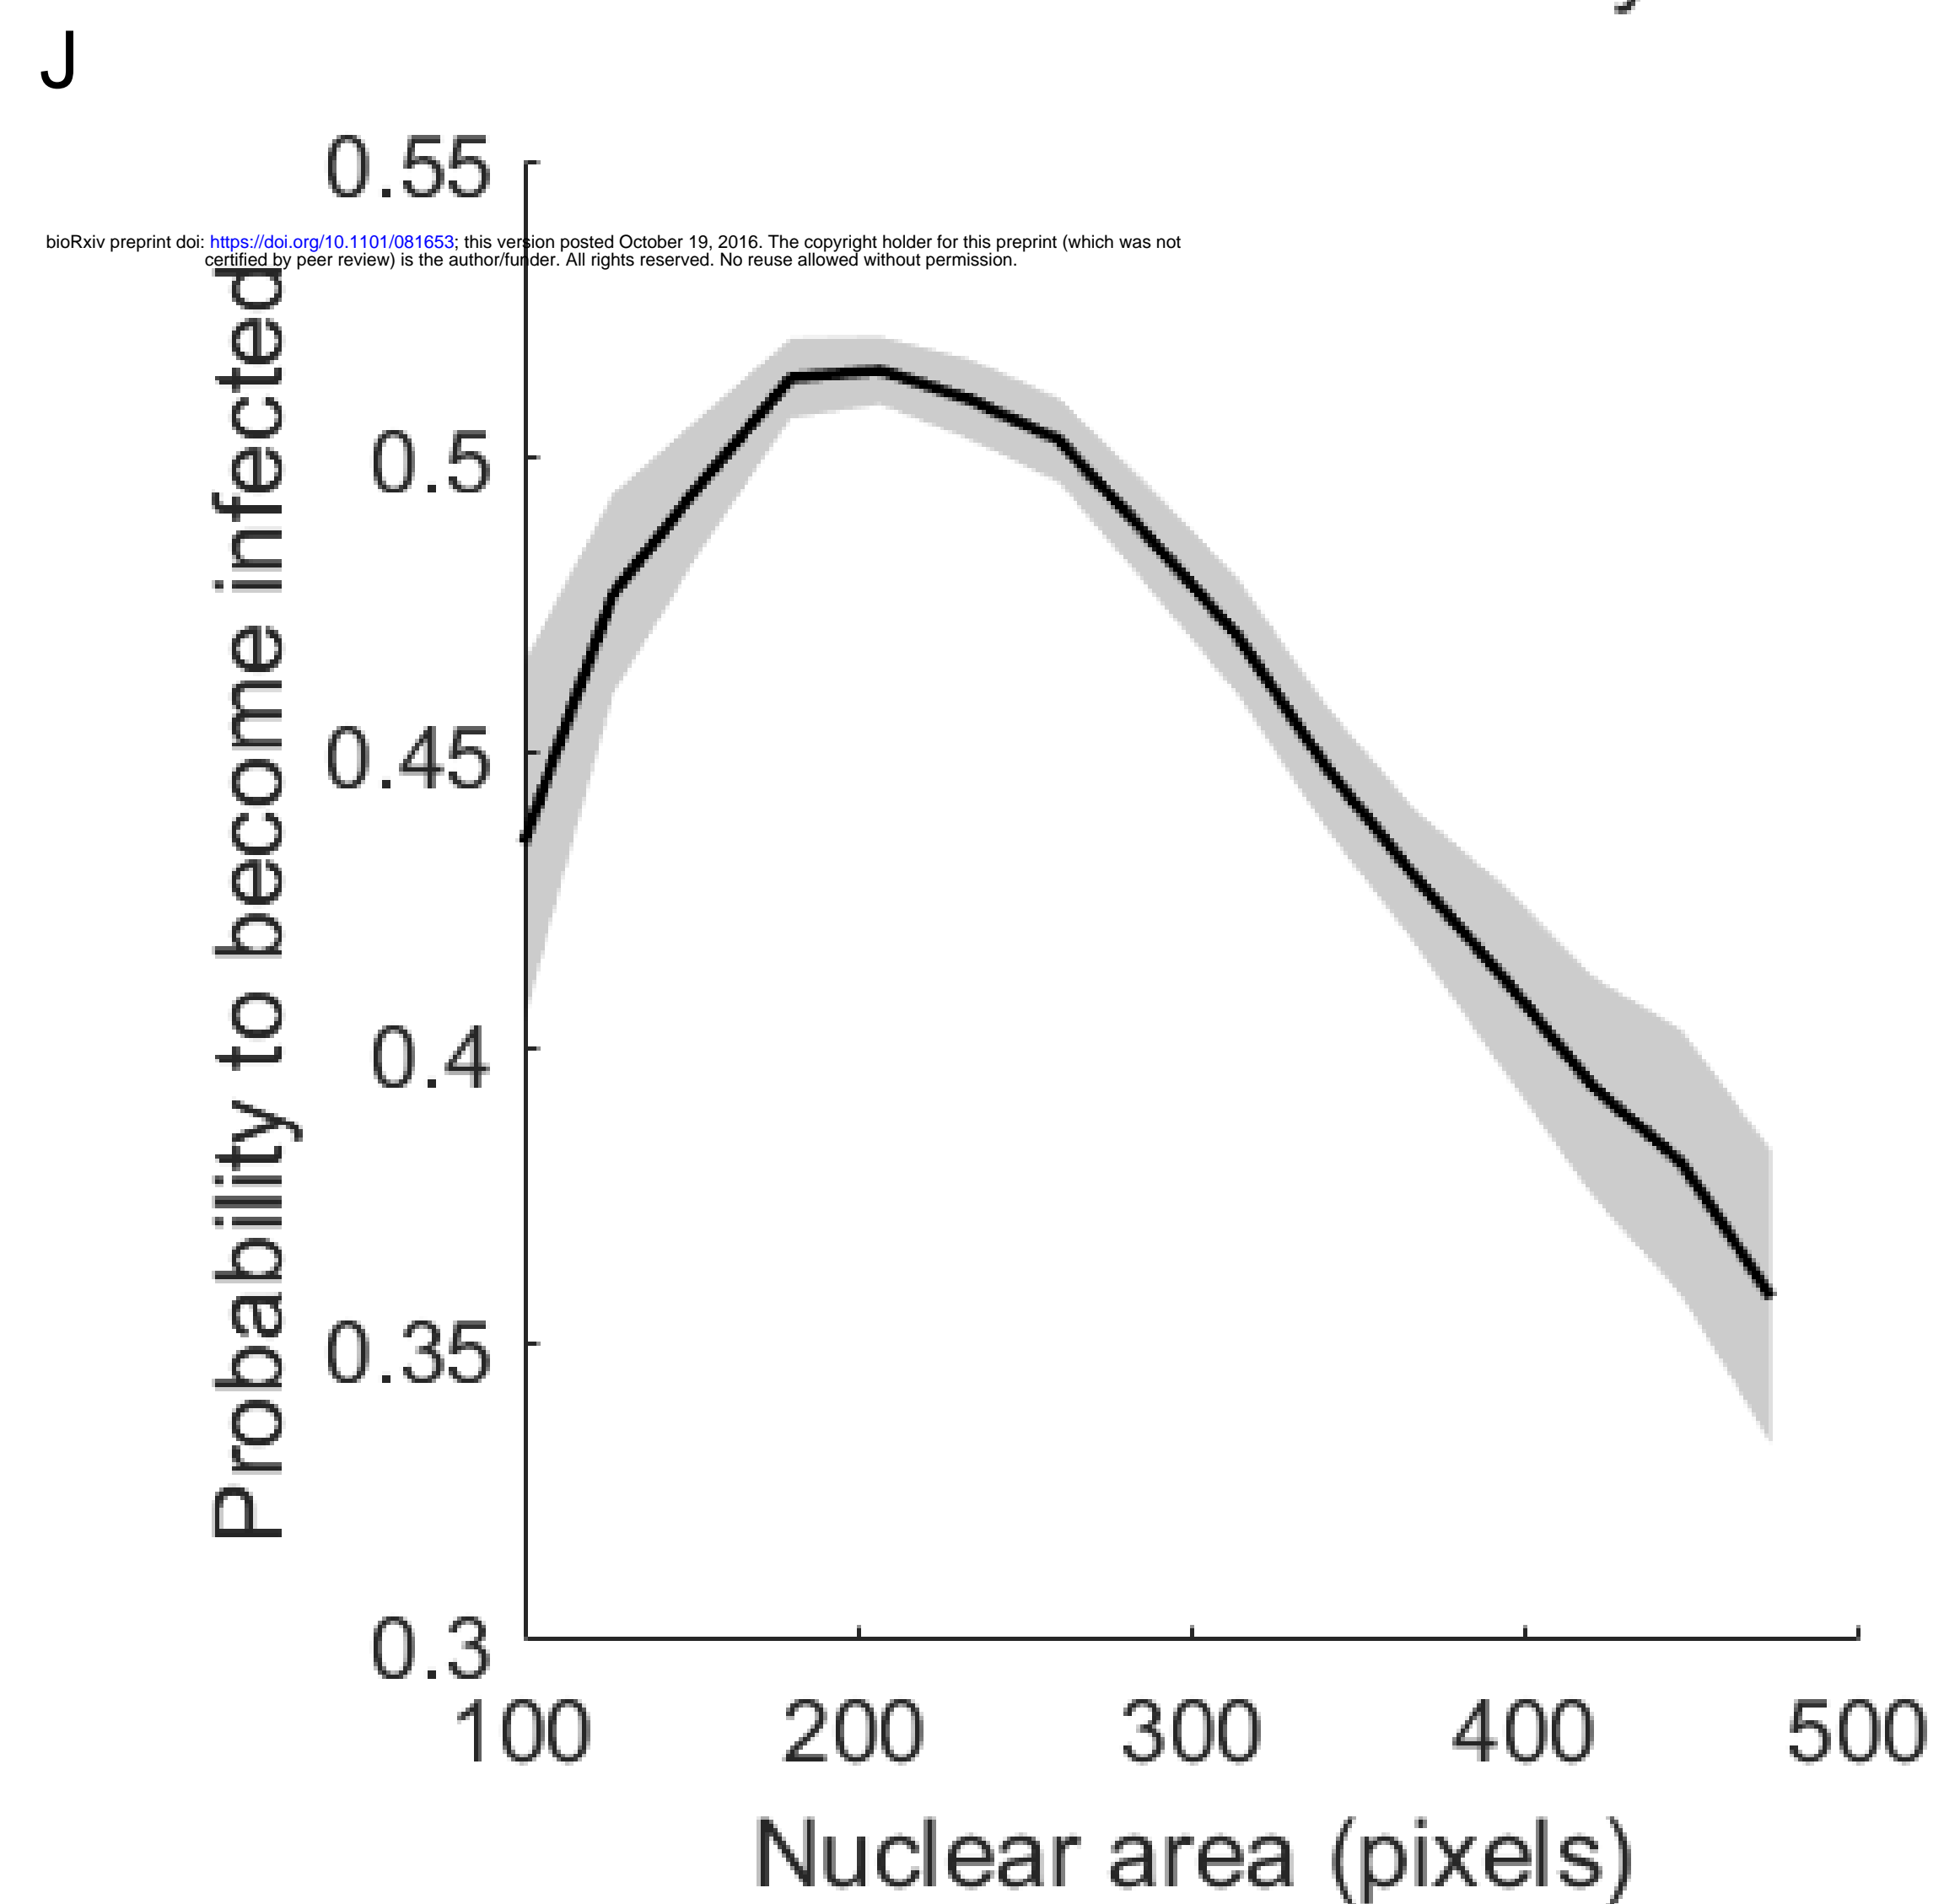

#### Supplementary Figure 4 – Infection probability as a function of different features

We analyzed the relation between infection probability and the top 10 features used by the supervised machine learning algorithm to predict infection outcome. Infection probability was calculated by binning the cells and calculating the percentage of infected cells in each bin. The features are: (A) normalized cluster prominence of the nucleus from the phase channel, (B) normalized cell velocity, (C) normalized mCherry concentration, (D), raw cluster prominence of the nucleus from the phase channel, (E) normalized information measure of correlation 1 of the nucleus from the mCherry channel, (F) raw information measure of correlation 1 of the nucleus from the mCherry channel, (G) normalized Inverse difference moment normalized of the nucleus from the mCherry channel, (H) normalized correlation of the nucleus from the mCherry channel, (I) cell-cycle stage and (J) nuclear area

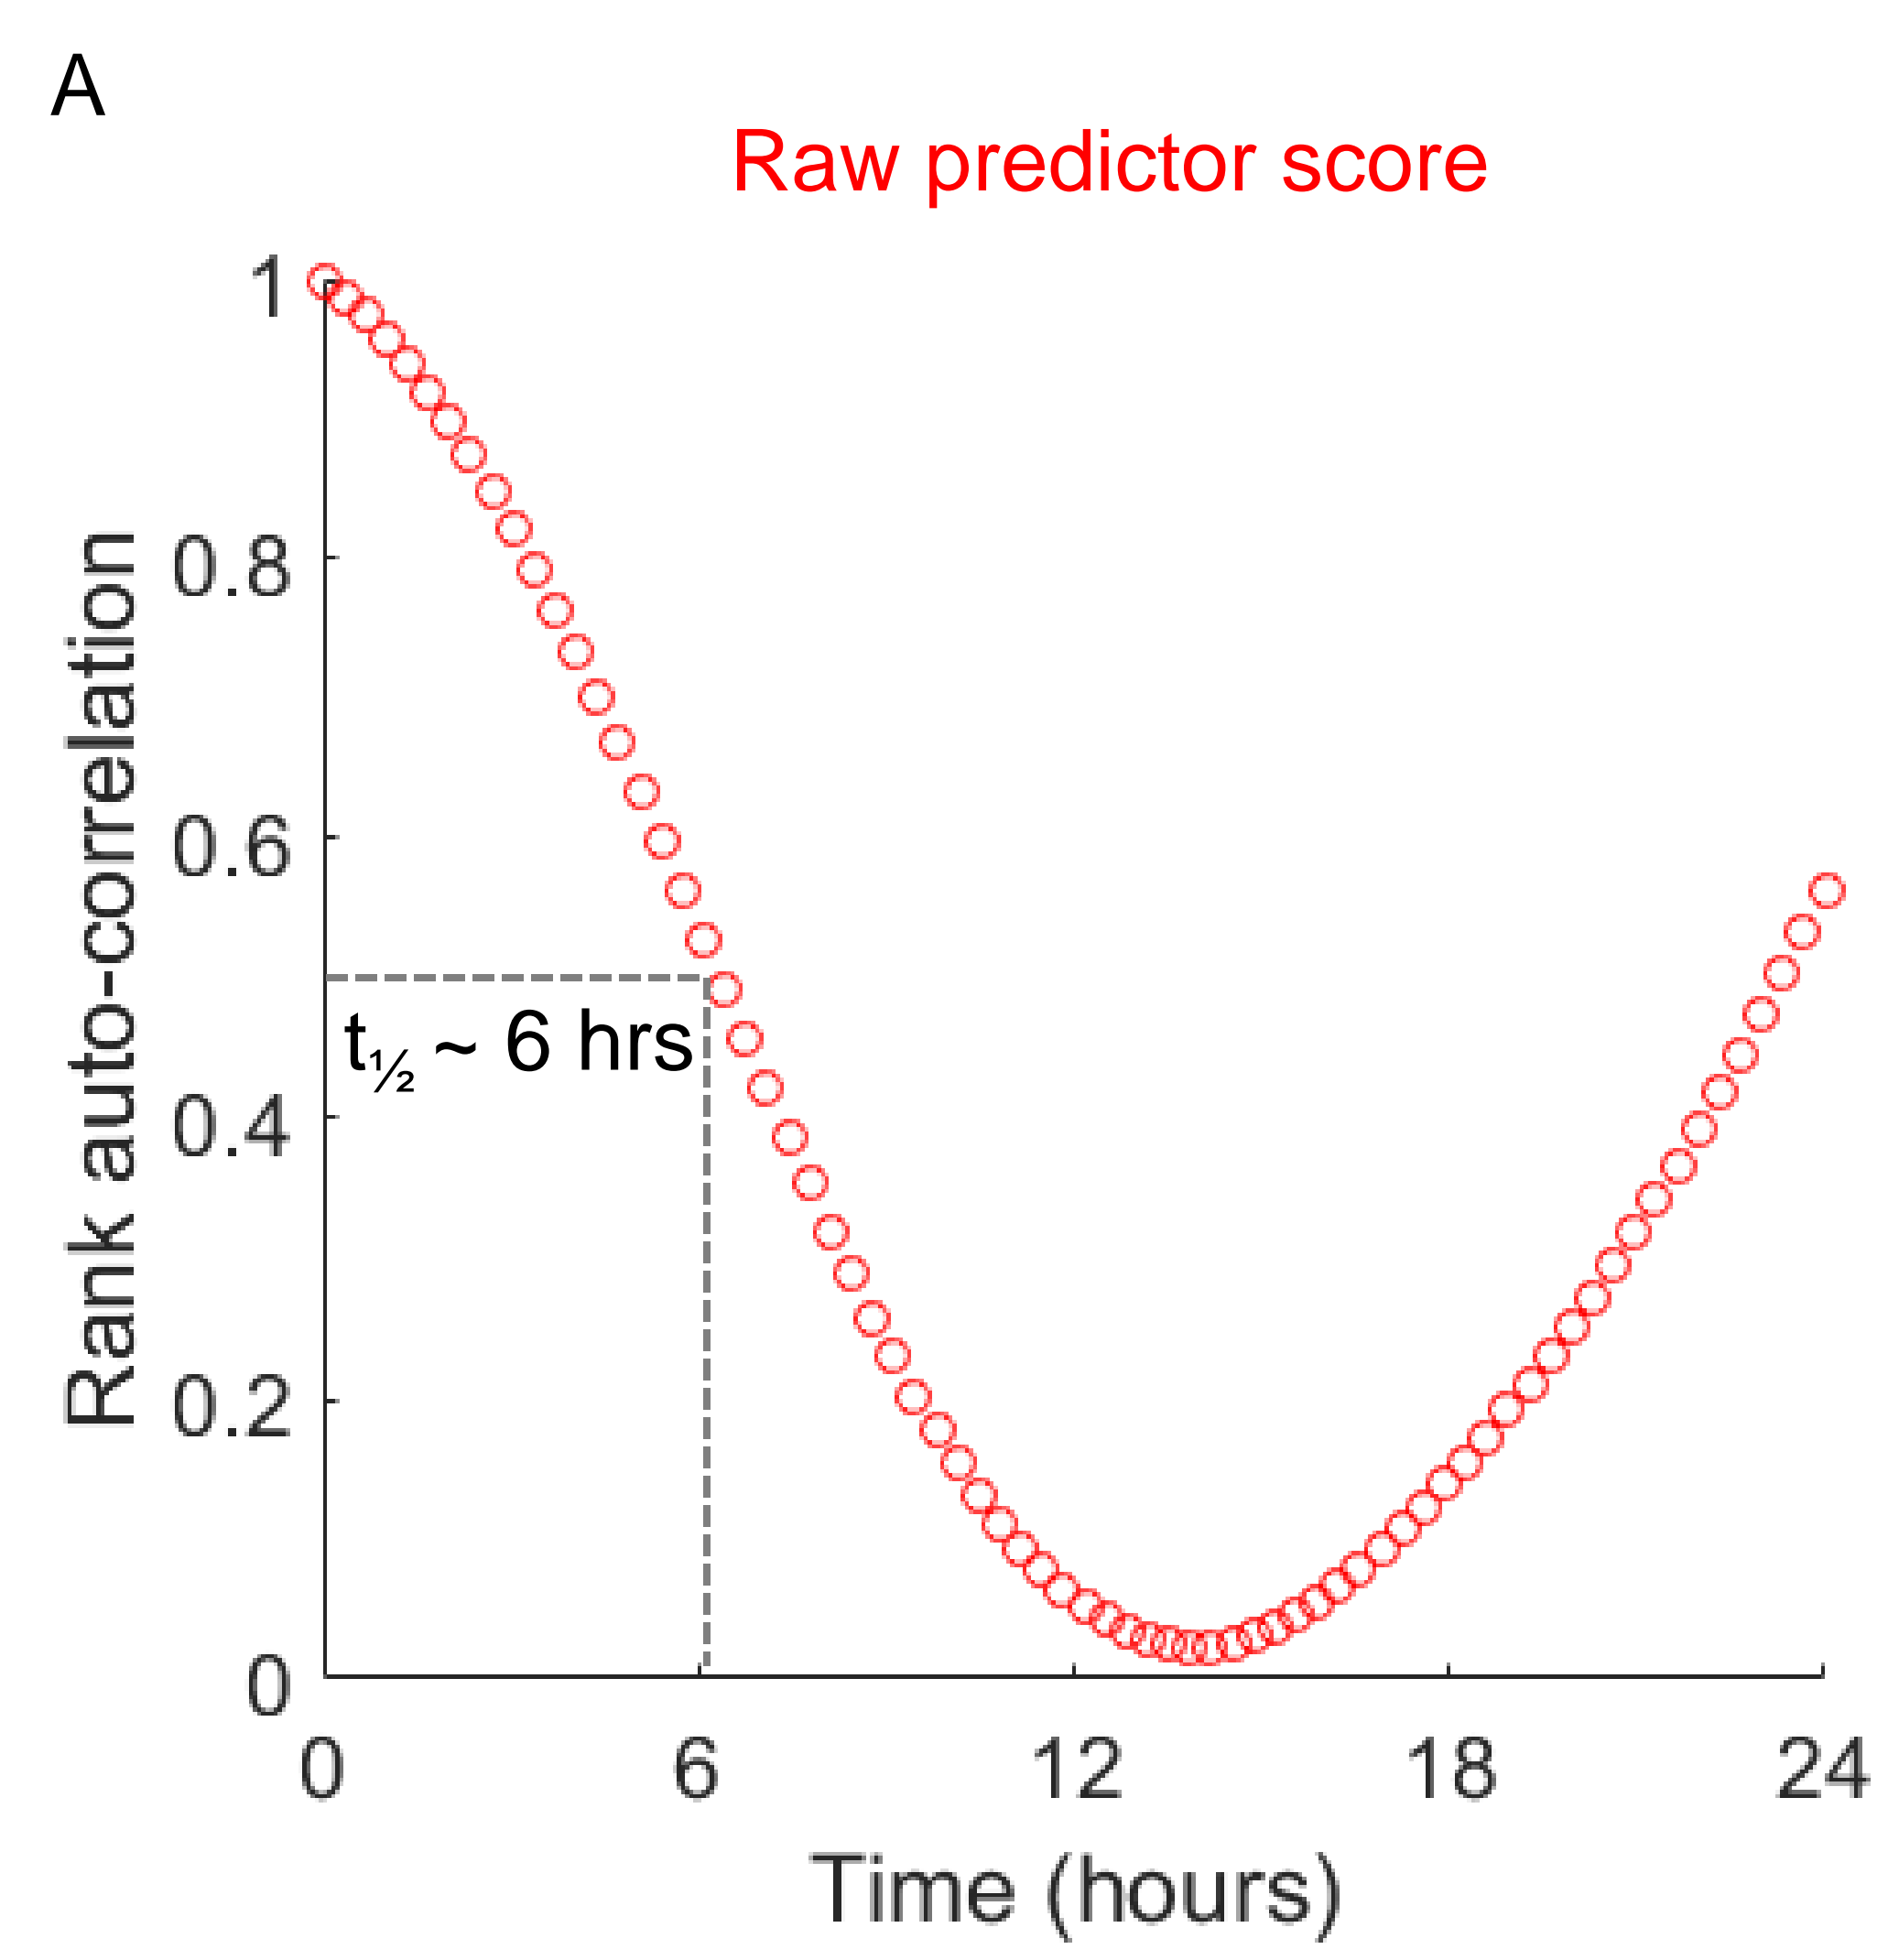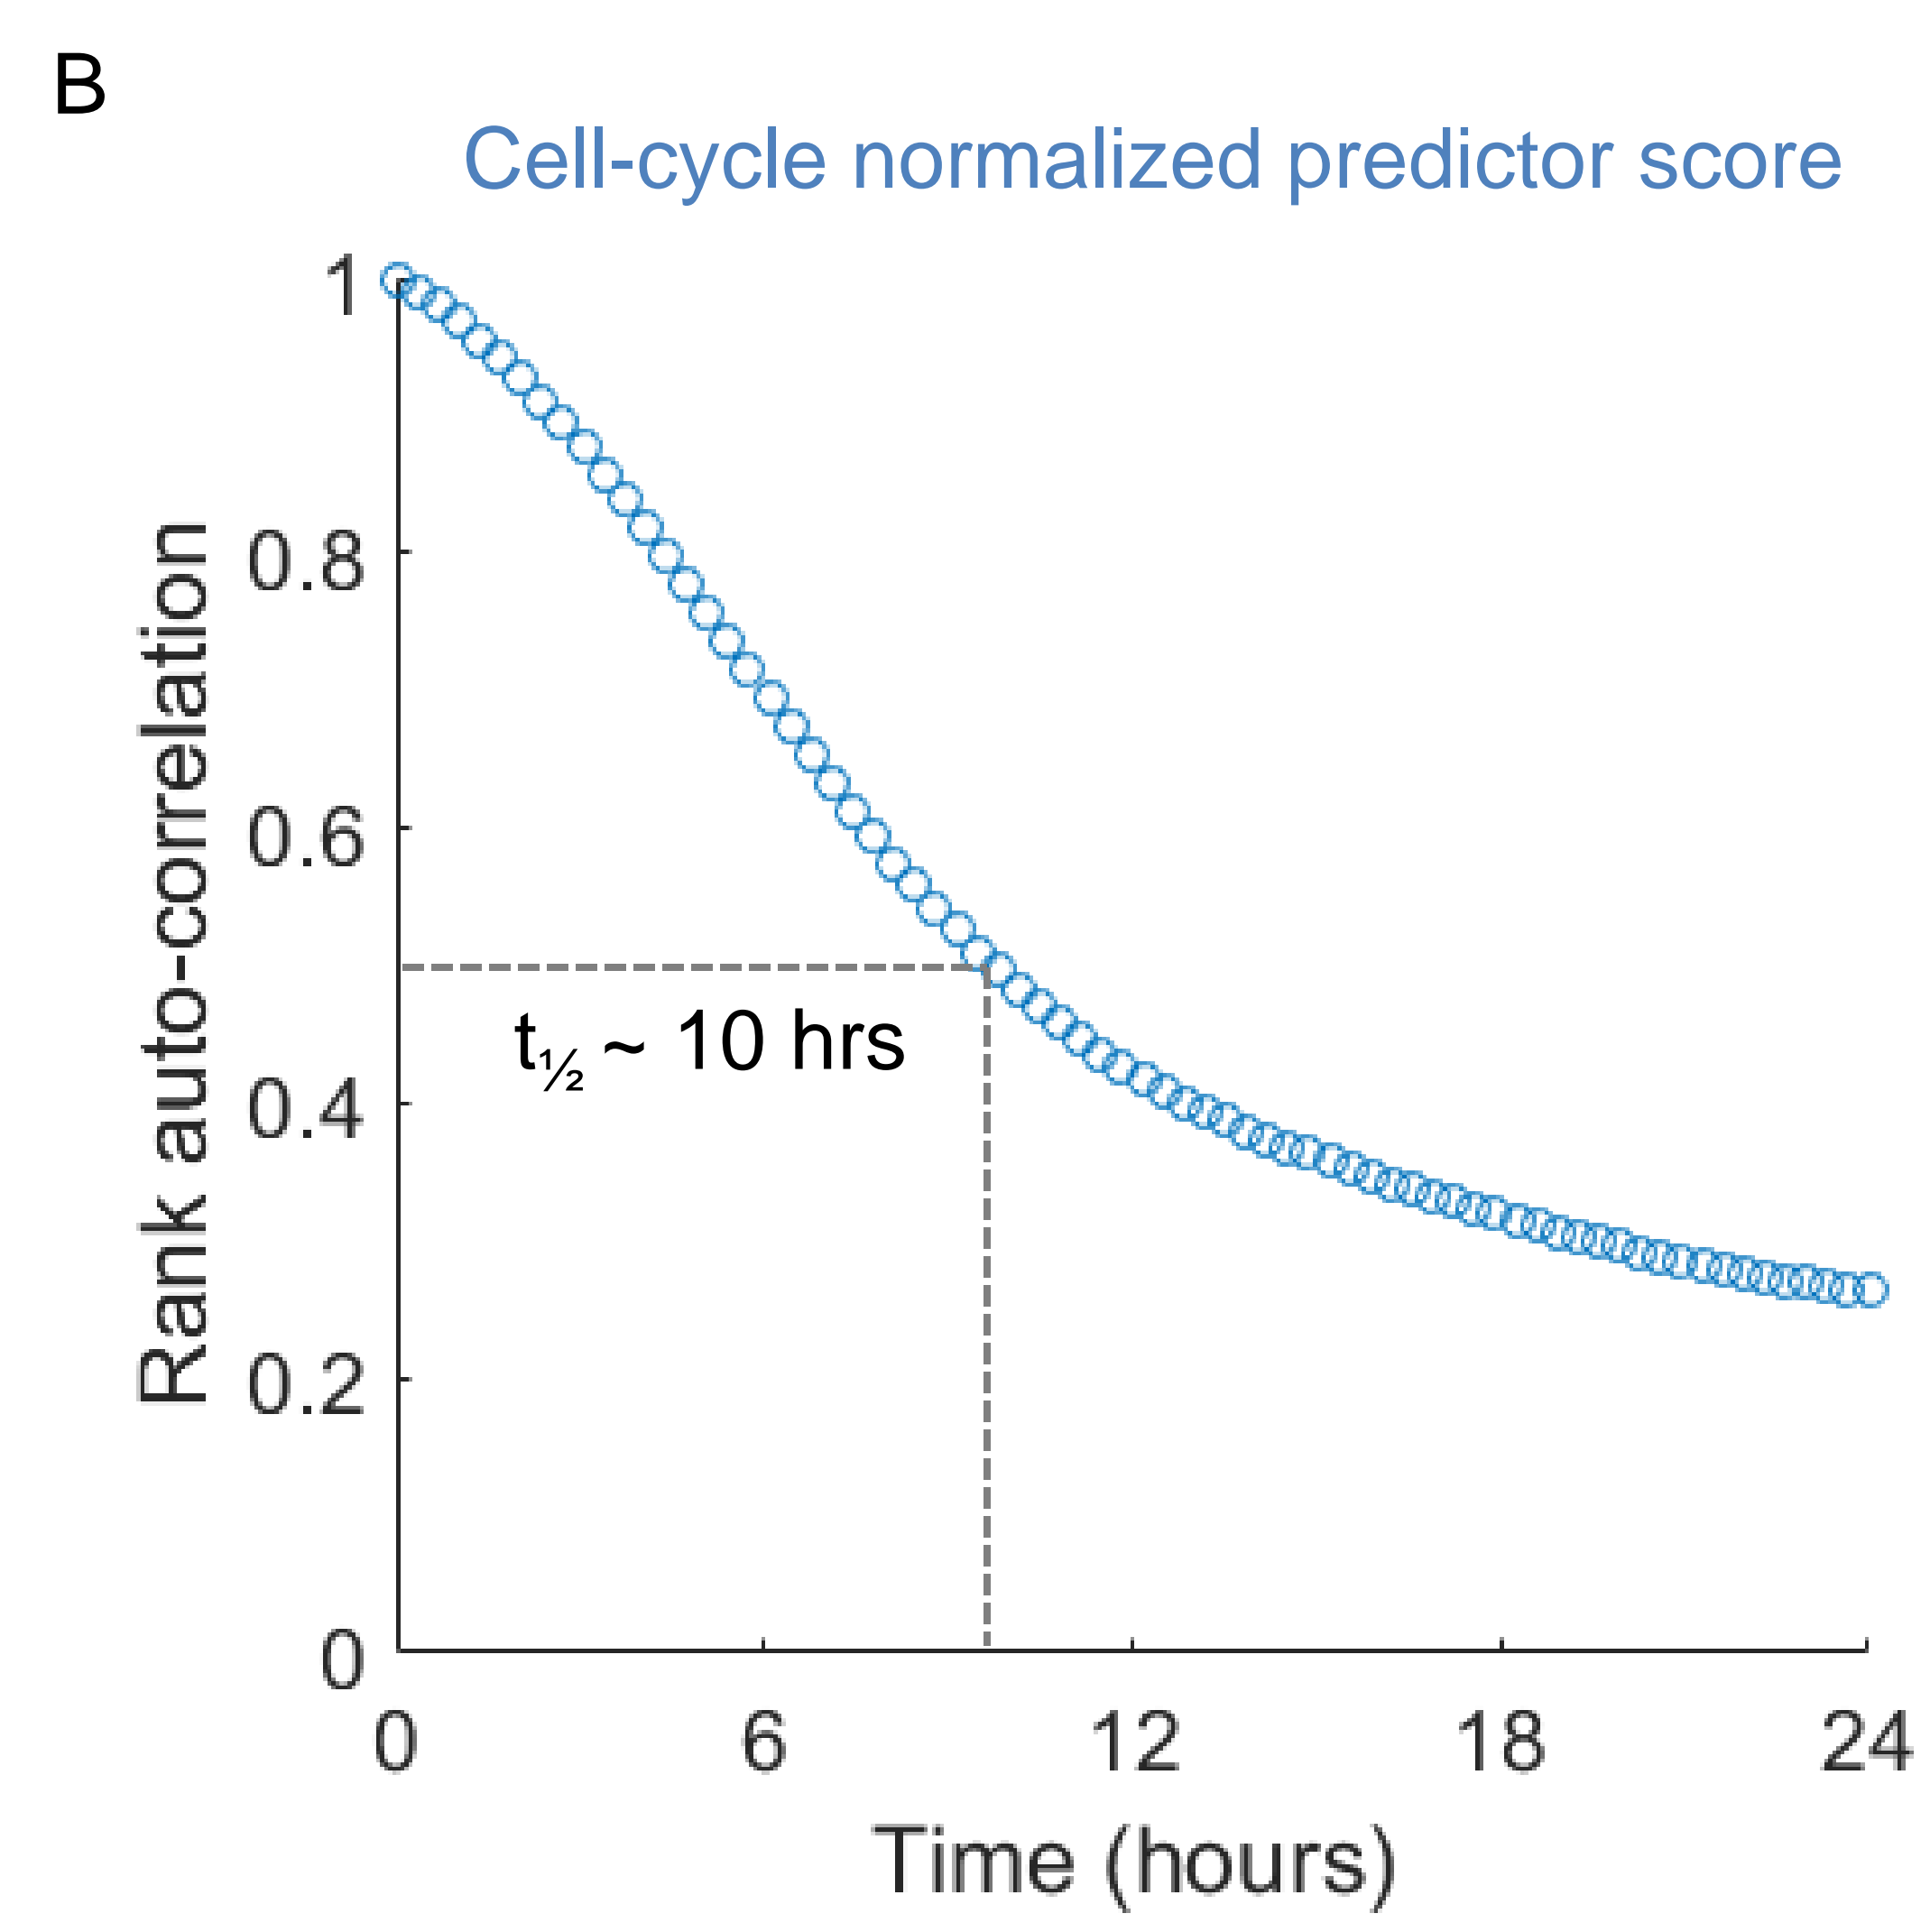

### Supplementary Figure 5 – Rank auto-correlation of predictor score in individual cells over time

Predictor score were calculated for >200 cells that were tracked for 24 hours prior to infection. The cells were ranked according to their score in the first frame, and the rank auto-correlation was calculated. Shown are the auto-correlation for the raw predictor score (A) and after normalizing the score according to the cell-cycle position of the cell (B). The raw scores decays faster, with a  $t_{1/2}$  time of about 6 hours. It reaches zero around half a cell-cycle (12 hours) and then begins to raise again. After normalizing for the cell-cycle effect, the auto-correlation decay is slower, with a  $t_{1/2}$  around 10 hours.
